# Supplementary material
Source: PubMed Central journal article supplement (PMC3497393)
Supplement: AEM.01938-12_zam999103868so1.pdf [file AEM.01938-12_zam999103868so1.pdf]

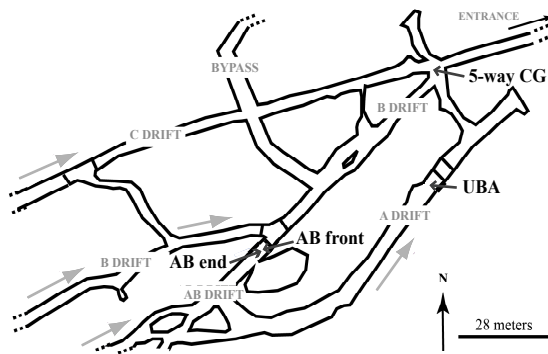

FIG. S1. Map of mine showing sampling locations

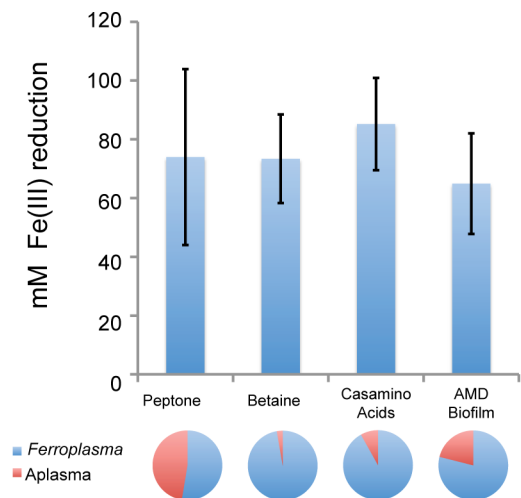

FIG S2. Bar graph (top) represents ferric iron reduction (mM) in anaerobic enrichments on different carbon substrates. Error bars are +/- SD. Pie charts (bottom) show representative community composition based on 16S clone libraries (at least 50 clones each).
