# Supplementary material
Source: PubMed Central journal article supplement (PMC3497393)
Supplement: AEM.01938-12_zam999103868so2.pdf [file AEM.01938-12_zam999103868so2.pdf]

**Table S1. Samples used in this study**

| Sample            | Site             | Date   | pH   | Temperature (°C) | Reference         |
|-------------------|------------------|--------|------|------------------|-------------------|
| GS1               |                  |        |      |                  |                   |
| Sample 4          | C drift + 8-10 m | Nov-06 | 1.01 | 39.5             | (1)               |
| Sample 11         | AB Muck +20 m    | Jun-06 | 0.72 | 36.0             | (1)               |
| Sample 14         | AB Muck +20 m    | Jun-06 | 0.72 | 36.0             | (1)               |
| Sample 17         | AB Muck          | Jun-06 | 0.72 | 36.0             | (1)               |
| Sample 28         | C drift + 8-10 m | Nov-05 | 0.5  | 40.0             | (1)               |
| Sample 29         | C drift + 30 m   | Nov-04 | ND   | 41.0             | (1)               |
| Sample 30         | C drift +20 m    | Nov-04 | ND   | 41.0             | (1)               |
| Sample 31         | C drift          | Nov-04 | ND   | 41.0             | (1)               |
| Sample 39         | B drif + 1-5m    | May-07 | 0.99 | 46.0             | (1)               |
| Sample 41         | AB Muck          | Aug-07 | 0.83 | 37.1             | (1)               |
| GS2               |                  |        |      |                  |                   |
| Sample 7          | AB Muck          | Nov-06 | 1.01 | 39.5             | (1)               |
| Sample 8          | AB Muck          | Nov-06 | 1.18 | 42.7             | (1)               |
| Sample 9          | C drift +8-10 m  | Nov-06 | 1    | 43.0             | (1)               |
| Sample 10         | C drift + 75 m   | Nov-06 | 0.7  | 43.0             | (1)               |
| Sample 20         | C drift + 75 m   | Aug-06 | 0.72 | 36.0             | (1)               |
| Sample 25         | C drift + 75 m   | Jun-06 | 0.92 | 39.3             | (1)               |
| Sample 33         | AB Muck          | Jun-06 | 0.93 | 42.0             | (1)               |
| Sample 40         | C drift +8-10 m  | Aug-06 | 1    | 41.0             | (1)               |
| Sample 49         | B drift          | Mar-05 | 1.12 | 40.2             | (1)               |
| 5way Floating GS2 | 5way             | Feb-08 | 0.98 | 38.0             | <i>this study</i> |
| Submerged         |                  |        |      |                  |                   |
| 5way-Sunken1      | 5way             | Feb-08 | 0.98 | 38.0             | <i>this study</i> |
| 5way-Sunken2      | 5way             | Feb-08 | 0.98 | 38.0             | <i>this study</i> |
| 5way-Sunken3      | 5way             | Feb-08 | 0.98 | 38.0             | <i>this study</i> |
| UBA-Sunken1       | UBA              | Jun-09 | 1.1  | 38.0             | <i>this study</i> |
| UBA-Sunken2       | UBA              | Jun-09 | 1.1  | 38.0             | <i>this study</i> |
| UBA-Sunken3       | UBA              | Jun-09 | 1.1  | 38.0             | <i>this study</i> |

(1)Mueller, R. S., V. J. Deneff, L. H. Kalnejais, B. K. Suttle, B. C. Thomas, P. Wilmes, R. L. Smith, D. K. Nordstrom, R. B. McCleskey, M. Shah, N. VerBerkmoes, R. L. Hettich, and J. Banfield. 2010. Ecological distribution and population physiology defined by proteomics in a natural microbial community. *Molecular Systems Biology* 6.

**Table S2: FISH analysis results for the sunken biofilm samples.**

|           | 5way-Sunken1 | 5way-Sunken2 | UBA-Sunken1 | UBA-Sunken2 | UBA-Sunken3 |
|-----------|--------------|--------------|-------------|-------------|-------------|
| EubMix    | 28.1 (8.9)   | 17.0 (8.75)  | 24.2 (8.5)  | 21.8 (10.3) | 23.2 (9.9)  |
| ARC915    | 50.1 (11.9)  | 65.4 (10.1)  | 73.1 (5.4)  | 78.2 (4.7)  | 76.9 (7.1)  |
| LF655     | 10.8 (6.8)   | <5           | 20.6 (7.9)  | 13.9 (10.1) | 23.2 (5.9)  |
| SUL230    | 15.6 (10.0)  | 13.1 (11.9)  | <5          | <5          | <5          |
| ARMAN 4/5 | 23.1 (7.4)   | 16.7 (6.5)   | <1          | <1          | <1          |

\*<1 and <5 indicates qualitative assessment only

**Table S3: All archaeal proteins detected across samples**

| Protein        | Annotation                                                                                                                                                                     |
|----------------|--------------------------------------------------------------------------------------------------------------------------------------------------------------------------------|
| IPL_15911_0581 | hypothetical protein                                                                                                                                                           |
| IPL_15911_0573 | oligopeptide ABC transporter Opp1, ATP binding protein; K02031 peptide/nickel transport system ATP-binding protein; K02032 peptide/nickel transport system ATP-binding protein |
| IPL_15911_0569 | putative glycogen debranching enzyme                                                                                                                                           |
| IPL_15911_0566 | transcription regulator                                                                                                                                                        |
| IPL_15911_0558 | icd; isocitrate dehydrogenase, nADP-dependent; K00031 isocitrate dehydrogenase [EC:1.1.1.42]                                                                                   |
| IPL_15911_0557 | transcription factor; K03120 transcription initiation factor TFIID TATA-box-binding protein                                                                                    |
| IPL_15911_0498 | rps28e; 30S ribosomal protein S28e; K02979 small subunit ribosomal protein S28e                                                                                                |
| IPL_15911_0419 | thermosome                                                                                                                                                                     |
| IPL_15911_0383 | cobQ; cobyrinic acid synthase (EC:6.3.5.10); K02232 adenosylcobyrinic acid synthase [EC:6.3.5.10]                                                                              |
| IPL_15911_0328 | rps19p; 30S ribosomal protein S19P; K02965 small subunit ribosomal protein S19                                                                                                 |
| IPL_15911_0321 | rpl14p; 50S ribosomal protein L14P; K02874 large subunit ribosomal protein L14                                                                                                 |
| IPL_15911_0268 | 2-oxoacid ferredoxin oxidoreductase subunit alpha; K00174 2-oxoglutarate ferredoxin oxidoreductase subunit alpha [EC:1.2.7.3]                                                  |
| IPL_15911_0264 | seryl-tRNA synthetase (EC:6.1.1.11); K01875 seryl-tRNA synthetase [EC:6.1.1.11]                                                                                                |
| IPL_15911_0262 | aspartyl-tRNA(Asn) amidotransferase, B subunit; K03330 glutamyl-tRNA(Gln) amidotransferase subunit E [EC:6.3.5.7]                                                              |
| IPL_15911_0253 | putative deoxyhypusine synthase (EC:2.5.1.46); K00809 deoxyhypusine synthase [EC:2.5.1.46]                                                                                     |

|                |                                                                                                                                                                                                         |
|----------------|---------------------------------------------------------------------------------------------------------------------------------------------------------------------------------------------------------|
| IPL_15911_0239 | DNA-directed RNA polymerase subunit B; K13798 DNA-directed RNA polymerase subunit B [EC:2.7.7.6]                                                                                                        |
| IPL_15911_0234 | hypothetical protein                                                                                                                                                                                    |
| IPL_15911_0222 | peptidase S16, Lon-like protease; K04076 Lon-like ATP-dependent protease [EC:3.4.21.-]                                                                                                                  |
| IPL_15911_0218 | purE; phosphoribosylaminoimidazole carboxylase catalytic subunit; K01588 5-(carboxyamino)imidazole ribonucleotide mutase [EC:5.4.99.18]                                                                 |
| IPL_15911_0216 | dnaG; DNA primase                                                                                                                                                                                       |
| IPL_15911_0207 | small GTP-binding protein                                                                                                                                                                               |
| IPL_15911_0147 | hypothetical protein; K07029                                                                                                                                                                            |
| IPL_15911_0127 | chromosome hypothetical proteinregation protein SMC; K03529 chromosome hypothetical proteinregation protein                                                                                             |
| IPL_15911_0124 | methionine adenosyltransferase (EC:2.5.1.6); K00789 S-adenosylmethionine synthetase [EC:2.5.1.6]                                                                                                        |
| IPL_15911_0123 | phosphoribosylaminoimidazolecarboxamide formyltransferase/IMP cyclohydrolase (EC:3.5.4.10); K00602 phosphoribosylaminoimidazolecarboxamide formyltransferase / IMP cyclohydrolase [EC:2.1.2.3 3.5.4.10] |
| IPL_15911_0107 | AAA family ATPase, CDC48 subfamily (EC:3.6.1.3); K13525 transitional endoplasmic reticulum ATPase                                                                                                       |
| IPL_15911_0090 | serine/threonine protein kinase (EC:2.7.11.1); K00870 protein kinase [EC:2.7.1.37]                                                                                                                      |
| IPL_15911_0089 | serine/threonine protein kinase (EC:2.7.11.1); K00870 protein kinase [EC:2.7.1.37]                                                                                                                      |
| IPL_15911_0083 | transcription factor TFIIIB cyclin-related protein; K03124 transcription initiation factor TFIIIB                                                                                                       |
| IPL_15911_0066 | urocanate hydratase (EC:4.2.1.49); K01712 urocanate hydratase [EC:4.2.1.49]                                                                                                                             |
| IPL_15911_0014 | hypothetical protein                                                                                                                                                                                    |
| IPL_13624_0384 | arylsulfatase regulatory protein, putative; K06871                                                                                                                                                      |
| IPL_13624_0383 | MFS general substrate transporter                                                                                                                                                                       |
| IPL_13624_0382 | Fe-S oxidoreductase                                                                                                                                                                                     |
| IPL_13624_0381 | hypothetical protein                                                                                                                                                                                    |
| IPL_13624_0350 | ef1a, tuf; elongation factor 1-alpha (EC:3.6.5.3); K03231 elongation factor EF-1 alpha subunit [EC:3.6.5.3]                                                                                             |
| IPL_13624_0347 | ribosomal protein S7; K02992 small subunit ribosomal protein S7                                                                                                                                         |
| IPL_13624_0326 | superoxide dismutase (EC:1.15.1.1); K04564 superoxide dismutase, Fe-Mn family [EC:1.15.1.1]                                                                                                             |
| IPL_13624_0273 | 4-aminobutyrate aminotransferase (EC:2.6.1.19); K00823 4-aminobutyrate aminotransferase [EC:2.6.1.19]                                                                                                   |
| IPL_13624_0267 | aldehyde dehydrogenase; K07248 lactaldehyde dehydrogenase / glycolaldehyde dehydrogenase [EC:1.2.1.22 1.2.1.21]                                                                                         |
| IPL_13624_0250 | threonine synthase (EC:4.2.3.1); K01733 threonine synthase [EC:4.2.3.1]                                                                                                                                 |
| IPL_13624_0240 | thiamine pyrophosphate enzyme; K01652 acetolactate synthase I/II/III large subunit [EC:2.2.1.6]                                                                                                         |
| IPL_13624_0224 | 4-hydroxyphenylpyruvate dioxygenase (EC:1.13.11.27); K00457 4-hydroxyphenylpyruvate dioxygenase [EC:1.13.11.27]                                                                                         |
| IPL_13624_0194 | ABC transporter related; K02006 cobalt/nickel transport system ATP-binding protein                                                                                                                      |

|                |                                                                                                                                                     |
|----------------|-----------------------------------------------------------------------------------------------------------------------------------------------------|
| IPL_13624_0137 | NAD-dependent aldehyde dehydrogenase; K00294 1-pyrroline-5-carboxylate dehydrogenase [EC:1.5.1.12]                                                  |
| IPL_13624_0135 | carB; carbamoyl-phosphate synthase, large subunit (EC:6.3.5.5); K01955 carbamoyl-phosphate synthase large subunit [EC:6.3.5.5]                      |
| IPL_13624_0071 | valyl-tRNA synthetase; K01873 valyl-tRNA synthetase [EC:6.1.1.9]                                                                                    |
| IPL_13624_0064 | proteasome endopeptidase complex, alpha subunit (EC:3.4.25.1); K03432 proteasome alpha subunit [EC:3.4.25.1]                                        |
| IPL_13624_0044 | membrane metalloprotease                                                                                                                            |
| IPL_13624_0040 | translation initiation factor eIF-5A; K03263 translation initiation factor eIF-5A                                                                   |
| IPL_13624_0007 | DNA integration/recombination/inversion protein                                                                                                     |
| IPL_13624_0004 | molybdenum cofactor biosynthesis protein A; K06937                                                                                                  |
| IPL_13624_0001 | integrase/recombinase                                                                                                                               |
| IPL_13613_0001 | integrase/recombinase                                                                                                                               |
| IPL_13606_0513 | aldehyde:ferredoxin oxidoreductase; K03738 aldehyde:ferredoxin oxidoreductase [EC:1.2.7.5]                                                          |
| IPL_13606_0459 | 2,4-dienoyl-CoA reductase (NADPH) precursor related protein                                                                                         |
| IPL_13606_0441 | pyruvate, phosphate dikinase (EC:2.7.9.1); K01006 pyruvate,orthophosphate dikinase [EC:2.7.9.1]                                                     |
| IPL_13606_0433 | hypothetical protein                                                                                                                                |
| IPL_13606_0387 | hypothetical protein                                                                                                                                |
| IPL_13606_0363 | aconitate hydratase (EC:4.2.1.3); K01681 aconitate hydratase 1 [EC:4.2.1.3]                                                                         |
| IPL_13606_0265 | pyruvate flavodoxin/ferredoxin oxidoreductase domain-containing protein; K00174 2-oxoglutarate ferredoxin oxidoreductase subunit alpha [EC:1.2.7.3] |
| IPL_13606_0257 | nucleoside-diphosphate-sugar epimerase; K01795 [EC:5.1.3.-]                                                                                         |
| IPL_13606_0201 | V-type ATP synthase subunit A (EC:3.6.3.14); K02117 V-type H <sup>+</sup> -transporting ATPase subunit A [EC:3.6.3.14]                              |
| IPL_13606_0200 | V-type ATP synthase subunit B (EC:3.6.3.14); K02118 V-type H <sup>+</sup> -transporting ATPase subunit B [EC:3.6.3.14]                              |
| IPL_13606_0192 | protein of unknown function DUF255; K06888                                                                                                          |
| IPL_13606_0135 | katG; catalase (peroxidase I); K03782 catalase/peroxidase [EC:1.11.1.6 1.11.1.7]                                                                    |
| IPL_13606_0121 | dnaK; molecular chaperone DnaK; K04043 molecular chaperone DnaK                                                                                     |
| IPL_13606_0110 | sdhA; succinate dehydrogenase flavoprotein subunit (EC:1.3.5.1); K00239 succinate dehydrogenase flavoprotein subunit [EC:1.3.99.1]                  |
| IPL_13606_0079 | ABC-type multidrug transport system, ATPase component; K01990 ABC-2 type transport system ATP-binding protein                                       |
| IPL_13606_0059 | oligopeptide/dipeptide ABC transporter, ATPase subunit                                                                                              |
| IPL_13606_0037 | chaperonin GroEL                                                                                                                                    |
| IPL_13606_0011 | hypothetical protein                                                                                                                                |
| IPL_13448_0025 | hypothetical protein                                                                                                                                |

|                |                                                                                                                                           |
|----------------|-------------------------------------------------------------------------------------------------------------------------------------------|
| IPL_13448_0021 | hypothetical protein                                                                                                                      |
| IPL_13448_0018 | type III restriction enzyme, res subunit family                                                                                           |
| IPL_13448_0017 | modification methylase                                                                                                                    |
| IPL_13249_0160 | 3-hydroxybutyryl-CoA dehydrogenase (EC:1.1.1.157); K00074 3-hydroxybutyryl-CoA dehydrogenase [EC:1.1.1.157]                               |
| IPL_13249_0156 | hypothetical protein                                                                                                                      |
| IPL_13249_0145 | small nuclear ribonucleoprotein (snRNP)-like protein                                                                                      |
| IPL_13249_0140 | glutamate dehydrogenase; K00261 glutamate dehydrogenase (NAD(P)+) [EC:1.4.1.3]                                                            |
| IPL_13249_0100 | inosine-5'-monophosphate dehydrogenase (EC:1.1.1.205); K00088 IMP dehydrogenase [EC:1.1.1.205]                                            |
| IPL_13249_0090 | methionyl-tRNA synthetase; K01874 methionyl-tRNA synthetase [EC:6.1.1.10]                                                                 |
| IPL_13249_0061 | tetrahydrofolylpolyglutamate synthase related protein; K11754 dihydrofolate synthase / folylpolyglutamate synthase [EC:6.3.2.12 6.3.2.17] |
| GPL_13477_0077 | aldo/keto reductase                                                                                                                       |
| GPL_13477_0075 | formyltetrahydrofolate synthetase; K01938 formate--tetrahydrofolate ligase [EC:6.3.4.3]                                                   |
| GPL_13477_0072 | hypothetical protein                                                                                                                      |
| GPL_13477_0068 | multi drug ABC transporter ATP binding protein; K01990 ABC-2 type transport system ATP-binding protein                                    |
| GPL_13477_0066 | coenzyme A transferase                                                                                                                    |
| GPL_13477_0061 | prefoldin subunit beta; K04798 prefoldin beta subunit                                                                                     |
| GPL_13477_0059 | 6,7-dimethyl-8-ribityllumazine synthase (EC:2.5.1.9); K00794 riboflavin synthase beta chain [EC:2.5.1.-]                                  |
| GPL_13477_0057 | glycerol-3-phosphate cytidyltransferase (EC:2.7.7.39); K00980 glycerol-3-phosphate cytidyltransferase [EC:2.7.7.39]                       |
| GPL_13477_0053 | hypothetical protein; K00768 nicotinate-nucleotide--dimethylbenzimidazole phosphoribosyltransferase [EC:2.4.2.21]                         |
| GPL_13477_0040 | hypothetical protein                                                                                                                      |
| GPL_13477_0039 | 3-hydroxy-3-methylglutaryl-coenzyme A reductase (EC:1.1.1.34); K00021 3-hydroxy-3-methylglutaryl-CoA reductase [EC:1.1.1.34]              |
| GPL_13477_0037 | hypothetical protein                                                                                                                      |
| GPL_13477_0036 | long-chain-fatty-acid-CoA ligase ; K01897 long-chain acyl-CoA synthetase [EC:6.2.1.3]                                                     |
| GPL_13477_0032 | hypothetical protein                                                                                                                      |
| GPL_13477_0028 | aspartate carbamoyltransferase regulatory subunit (EC:2.1.3.2); K00610 aspartate carbamoyltransferase regulatory subunit                  |
| GPL_13477_0027 | pyrB; aspartate carbamoyltransferase catalytic subunit (EC:2.1.3.2); K00609 aspartate carbamoyltransferase catalytic subunit [EC:2.1.3.2] |

|                |                                                                                                                                      |
|----------------|--------------------------------------------------------------------------------------------------------------------------------------|
| GPL_13477_0026 | hypothetical protein; K07442 tRNA (adenine-N1-)-methyltransferase [EC:2.1.1.36]                                                      |
| GPL_13477_0024 | ATP-dependent RNA helicase; K03724 ATP-dependent helicase Lhr and Lhr-like helicase [EC:3.6.1.-]                                     |
| GPL_13477_0019 | oxidoreductase                                                                                                                       |
| GPL_13475_0044 | 3-deoxy-7-phosphoheptulonate synthase; K03856 3-deoxy-7-phosphoheptulonate synthase [EC:2.5.1.54]                                    |
| GPL_13475_0034 | ilvE1; branched-chain amino acid aminotransferase (EC:2.6.1.42); K00826 branched-chain amino acid aminotransferase [EC:2.6.1.42]     |
| GPL_13475_0029 | putative cyclase; K07130                                                                                                             |
| GPL_13475_0025 | biphenyl dioxygenase, Rieske iron-sulfur component related protein                                                                   |
| GPL_13475_0012 | methionine aminopeptidase (EC:3.4.11.18); K01265 methionyl aminopeptidase [EC:3.4.11.18]                                             |
| GPL_13459_0370 | type III restriction-modification enzyme, helicase subunit                                                                           |
| GPL_13459_0332 | pyruvate ferredoxin/ferredoxin oxidoreductase; K00180 indolepyruvate ferredoxin oxidoreductase, beta subunit [EC:1.2.7.8]            |
| GPL_13459_0331 | indolepyruvate ferredoxin oxidoreductase, alpha subunit; K00179 indolepyruvate ferredoxin oxidoreductase, alpha subunit [EC:1.2.7.8] |
| GPL_13459_0328 | long-chain-fatty-acid--CoA ligase (EC:2.3.1.86); K00666 fatty-acyl-CoA synthase [EC:6.2.1.-]                                         |
| GPL_13459_0324 | hypothetical protein                                                                                                                 |
| GPL_13459_0323 | proline dipeptidase related protein; K01271 X-Pro dipeptidase [EC:3.4.13.9]                                                          |
| GPL_13459_0321 | gluconolactonase                                                                                                                     |
| GPL_13459_0310 | neprilysin (EC:3.4.24.11); K07386 putative endopeptidase [EC:3.4.24.-]                                                               |
| GPL_13459_0309 | N-acetylglucosamine kinase (EC:2.7.1.59); K00884 N-acetylglucosamine kinase [EC:2.7.1.59]                                            |
| GPL_13459_0305 | hypothetical protein                                                                                                                 |
| GPL_13459_0287 | hypothetical protein                                                                                                                 |
| GPL_13459_0282 | hypothetical protein                                                                                                                 |
| GPL_13459_0281 | hypothetical protein                                                                                                                 |
| GPL_13459_0276 | L-asparaginase related protein; K01424 L-asparaginase [EC:3.5.1.1]                                                                   |
| GPL_13459_0274 | hypothetical protein; K09730 hypothetical protein                                                                                    |
| GPL_13459_0273 | ychF; translation-associated GTPase; K06942                                                                                          |
| GPL_13459_0269 | electron transfer flavoprotein alpha and beta-subunit                                                                                |
| GPL_13459_0268 | biphenyl dioxygenase, Rieske iron-sulfur component related protein                                                                   |
| GPL_13459_0265 | methionine aminopeptidase (EC:3.4.11.18); K01265 methionyl aminopeptidase [EC:3.4.11.18]                                             |
| GPL_13459_0263 | cystathionine gamma-lyase (EC:4.4.1.1); K01739 cystathionine gamma-synthase [EC:2.5.1.48]                                            |
| GPL_13459_0260 | ABC-type multidrug transport system, ATPase component                                                                                |

|                |                                                                                                                                                        |
|----------------|--------------------------------------------------------------------------------------------------------------------------------------------------------|
| GPL_13459_0259 | L-3-hydroxyacyl-CoA dehydrogenase precursor related protein                                                                                            |
| GPL_13459_0258 | sterol-binding domain-containing protein                                                                                                               |
| GPL_13459_0255 | 2-methylcitrate synthase/citrate synthase II (EC:2.3.3.1); K01647 citrate synthase [EC:2.3.3.1]                                                        |
| GPL_13459_0254 | isochorismatase hydrolase                                                                                                                              |
| GPL_13459_0249 | orotate phosphoribosyltransferase-like protein; K00762 orotate phosphoribosyltransferase [EC:2.4.2.10]                                                 |
| GPL_13459_0248 | lysK; lysyl-tRNA synthetase (EC:6.1.1.6); K04566 lysyl-tRNA synthetase, class I [EC:6.1.1.6]                                                           |
| GPL_13459_0247 | methionyl-tRNA synthetase (EC:6.1.1.10); K01874 methionyl-tRNA synthetase [EC:6.1.1.10]                                                                |
| GPL_13459_0246 | rpoK; DNA-directed RNA polymerase subunit K (EC:2.7.7.6); K03055 DNA-directed RNA polymerase subunit K [EC:2.7.7.6]                                    |
| GPL_13459_0242 | nusG; transcription antitermination protein NusG; K02601 transcriptional antiterminator NusG                                                           |
| GPL_13459_0241 | hypothetical protein                                                                                                                                   |
| GPL_13459_0240 | putative RNA-binding protein                                                                                                                           |
| GPL_13459_0239 | thiol-specific antioxidant related protein; K03564 peroxiredoxin Q/BCP [EC:1.11.1.15]                                                                  |
| GPL_13459_0238 | nucleic-acid-binding protein; K07068                                                                                                                   |
| GPL_13459_0237 | acetyl-CoA acetyltransferase (EC:2.3.1.9); K00626 acetyl-CoA C-acetyltransferase [EC:2.3.1.9]                                                          |
| GPL_13459_0236 | hypothetical protein                                                                                                                                   |
| GPL_13459_0235 | transcription regulator (HTH)                                                                                                                          |
| GPL_13459_0231 | rpl11p; 50S ribosomal protein L11P; K02867 large subunit ribosomal protein L11                                                                         |
| GPL_13459_0230 | rpl1P; 50S ribosomal protein L1P; K02863 large subunit ribosomal protein L1                                                                            |
| GPL_13459_0229 | rplP0; acidic ribosomal protein P0; K02864 large subunit ribosomal protein L10                                                                         |
| GPL_13459_0228 | rpl12p; 50S ribosomal protein L12P; K02869 large subunit ribosomal protein L12                                                                         |
| GPL_13459_0225 | glutamate formiminotransferase; K01746 formiminotetrahydrofolate cyclodeaminase [EC:4.3.1.4]                                                           |
| GPL_13459_0224 | formiminotransferase cyclodeaminase related protein                                                                                                    |
| GPL_13459_0222 | GTP-binding protein; K06944                                                                                                                            |
| GPL_13459_0221 | purA; adenylosuccinate synthetase (EC:6.3.4.4); K01939 adenylosuccinate synthase [EC:6.3.4.4]                                                          |
| GPL_13459_0219 | isocitrate dehydrogenase; K00031 isocitrate dehydrogenase [EC:1.1.1.42]                                                                                |
| GPL_13459_0218 | hypothetical protein                                                                                                                                   |
| GPL_13459_0217 | hypothetical protein                                                                                                                                   |
| GPL_13459_0214 | dihydrolipoamide dehydrogenase (EC:1.8.1.4); K00382 dihydrolipoamide dehydrogenase [EC:1.8.1.4]                                                        |
| GPL_13459_0213 | branched-chain alpha-keto acid dehydrogenase subunit E2; K00627 pyruvate dehydrogenase E2 component (dihydrolipoamide acetyltransferase) [EC:2.3.1.12] |
| GPL_13459_0212 | thiamine pyrophosphate-dependent dehydrogenase, E1 component beta subunit; K00162 pyruvate                                                             |

|                |                                                                                                                                          |
|----------------|------------------------------------------------------------------------------------------------------------------------------------------|
|                | dehydrogenase E1 component subunit beta [EC:1.2.4.1]                                                                                     |
| GPL_13459_0211 | 3-methyl-2-oxobutanoate dehydrogenase alpha chain precursor; K00161 pyruvate dehydrogenase E1 component subunit alpha [EC:1.2.4.1]       |
| GPL_13459_0208 | CoA-binding domain-containing protein                                                                                                    |
| GPL_13459_0206 | prolyl endopeptidase; K01322 prolyl oligopeptidase [EC:3.4.21.26]                                                                        |
| GPL_13459_0204 | hypothetical protein                                                                                                                     |
| GPL_13459_0196 | hypothetical protein                                                                                                                     |
| GPL_13459_0195 | ABC transporter related protein                                                                                                          |
| GPL_13459_0193 | glycosyltransferase (EC:2.4.1.-)                                                                                                         |
| GPL_13459_0191 | hypothetical protein; K09723 hypothetical protein                                                                                        |
| GPL_13459_0188 | proteasome subunit alpha (EC:3.4.25.1); K03432 proteasome alpha subunit [EC:3.4.25.1]                                                    |
| GPL_13459_0183 | pyruvate ferredoxin oxidoreductase, alpha chain (EC:1.2.7.1); K00174 2-oxoglutarate ferredoxin oxidoreductase subunit alpha [EC:1.2.7.3] |
| GPL_13459_0182 | 2-oxoacid ferredoxin oxidoreductase subunit beta (EC:1.2.7.1); K00175 2-oxoglutarate ferredoxin oxidoreductase subunit beta [EC:1.2.7.3] |
| GPL_13459_0179 | rps12P; 30S ribosomal protein S12P; K02950 small subunit ribosomal protein S12                                                           |
| GPL_13459_0178 | 30S ribosomal protein S7P; K02992 small subunit ribosomal protein S7                                                                     |
| GPL_13459_0173 | gliding motility protein related                                                                                                         |
| GPL_13459_0171 | putative deoxyhypusine synthase (EC:2.5.1.46); K00809 deoxyhypusine synthase [EC:2.5.1.46]                                               |
| GPL_13459_0167 | tRNA CCA-pyrophosphorylase (EC:2.7.7.25 2.7.7.21); K07558 tRNA nucleotidyltransferase (CCA-adding enzyme) [EC:2.7.7.25 2.7.7.21]         |
| GPL_13459_0166 | ferredoxin                                                                                                                               |
| GPL_13459_0165 | phosphoribosylaminoimidazole synthetase (EC:6.3.3.1); K01933 phosphoribosylformylglycinamide cyclo-ligase [EC:6.3.3.1]                   |
| GPL_13459_0163 | hypothetical protein                                                                                                                     |
| GPL_13459_0162 | aconitate hydratase (EC:4.2.1.3); K01681 aconitate hydratase 1 [EC:4.2.1.3]                                                              |
| GPL_13459_0161 | tricorn protease; K08676 tricorn protease [EC:3.4.21.-]                                                                                  |
| GPL_13459_0159 | hypothetical protein                                                                                                                     |
| GPL_13459_0158 | geranylgeranyl pyrophosphate synthase (EC:2.5.1.1); K13787 geranylgeranyl diphosphate synthase, type I [EC:2.5.1.1 2.5.1.10 2.5.1.29]    |
| GPL_13459_0156 | TPR repeat-containing protein                                                                                                            |
| GPL_13459_0154 | Zn-dependent hydrolase                                                                                                                   |
| GPL_13459_0152 | sugar phosphate nucleotidyl transferase; K00992 [EC:2.7.7.-]                                                                             |



|                |                                                                                                                                                                                |
|----------------|--------------------------------------------------------------------------------------------------------------------------------------------------------------------------------|
| GPL_13459_0151 | 2-amino-3-ketobutyrate coenzyme A ligase (EC:2.3.1.29); K00639 glycine C-acetyltransferase [EC:2.3.1.29]                                                                       |
| GPL_13459_0150 | metal-dependent hydrolase related to alanyl-tRNA synthetase; K07050                                                                                                            |
| GPL_13459_0142 | geranylgeranyl reductase                                                                                                                                                       |
| GPL_13459_0140 | CBS domain-containing protein                                                                                                                                                  |
| GPL_13459_0139 | glycyl-tRNA synthetase (EC:6.1.1.14); K01880 glycyl-tRNA synthetase [EC:6.1.1.14]                                                                                              |
| GPL_13459_0137 | hypothetical protein; K06869                                                                                                                                                   |
| GPL_13459_0136 | glyceraldehyde-3-phosphate dehydrogenase (EC:1.2.1.59); K00150 glyceraldehyde-3-phosphate dehydrogenase (NAD(P)) [EC:1.2.1.59]                                                 |
| GPL_13459_0135 | radA; DNA repair and recombination protein RadA; K04483 DNA repair protein RadA                                                                                                |
| GPL_13459_0134 | hypothetical protein; K07103                                                                                                                                                   |
| GPL_13459_0133 | hypothetical protein                                                                                                                                                           |
| GPL_13459_0131 | oligopeptide ABC transporter Opp1, extracellular binding protein                                                                                                               |
| GPL_13459_0129 | oligopeptide ABC transporter Opp1, permease protein; K02034 peptide/nickel transport system permease protein                                                                   |
| GPL_13459_0128 | oligopeptide ABC transporter Opp1, ATP binding protein; K02031 peptide/nickel transport system ATP-binding protein; K02032 peptide/nickel transport system ATP-binding protein |
| GPL_13459_0126 | penicillin amidase (EC:3.5.1.11); K07116                                                                                                                                       |
| GPL_13459_0122 | aromatic acid decarboxylase; K03186 3-octaprenyl-4-hydroxybenzoate carboxy-lyase UbiX [EC:4.1.1.-]                                                                             |
| GPL_13459_0120 | cell division protein pelota related protein; K06965                                                                                                                           |
| GPL_13459_0117 | Metallo-hydrolase/oxidoreductase                                                                                                                                               |
| GPL_13459_0115 | fabG; 3-ketoacyl-(acyl-carrier-protein) reductase (EC:1.1.1.100); K00059 3-oxoacyl-[acyl-carrier protein] reductase [EC:1.1.1.100]                                             |
| GPL_13459_0114 | nth; endonuclease III; K10773 endonuclease III [EC:4.2.99.18]                                                                                                                  |
| GPL_13459_0112 | signal recognition particle protein SRP54; K03106 signal recognition particle subunit SRP54                                                                                    |
| GPL_13459_0110 | putative RNA-associated protein; K07582 hypothetical protein                                                                                                                   |
| GPL_13459_0109 | exosome complex RNA-binding protein Rrp4; K03679 exosome complex component RRP4                                                                                                |
| GPL_13459_0108 | exosome complex exonuclease Rrp41; K11600 exosome complex component RRP41                                                                                                      |
| GPL_13459_0107 | exosome complex RNA-binding protein Rrp42; K12589 exosome complex component RRP42                                                                                              |
| GPL_13459_0106 | rpl37ae; 50S ribosomal protein L37Ae; K02921 large subunit ribosomal protein L37Ae                                                                                             |
| GPL_13459_0104 | 50S ribosomal protein L21e; K02889 large subunit ribosomal protein L21e                                                                                                        |
| GPL_13459_0103 | DNA-directed RNA-polymerase subunit F (EC:2.7.7.6); K03051 DNA-directed RNA polymerase subunit F [EC:2.7.7.6]                                                                  |
| GPL_13459_0102 | hypothetical protein; K07572 putative nucleotide binding protein                                                                                                               |
| GPL_13459_0100 | band 7 integral membrane protein-like protein                                                                                                                                  |

|                |                                                                                                                                                               |
|----------------|---------------------------------------------------------------------------------------------------------------------------------------------------------------|
| GPL_13459_0096 | NAD-dependent aldehyde dehydrogenase; K00155 [EC:1.2.1.-]                                                                                                     |
| GPL_13459_0095 | acetolactate synthase (EC:2.2.1.6); K01652 acetolactate synthase I/II/III large subunit [EC:2.2.1.6]                                                          |
| GPL_13459_0089 | putative oxidoreductase; K00266 glutamate synthase (NADPH/NADH) small chain [EC:1.4.1.13 1.4.1.14]                                                            |
| GPL_13459_0087 | seryl-tRNA synthetase (EC:6.1.1.11); K01875 seryl-tRNA synthetase [EC:6.1.1.11]                                                                               |
| GPL_13459_0086 | hypothetical protein; K07145                                                                                                                                  |
| GPL_13459_0085 | hypothetical protein                                                                                                                                          |
| GPL_13459_0080 | hypothetical protein; K00806 undecaprenyl diphosphate synthase [EC:2.5.1.31]                                                                                  |
| GPL_13459_0075 | 2,5-diamino-6-hydroxy-4-(5-phosphoribosylamino)pyrimidine 1-reductase (EC:1.1.1.193); K00082 5-amino-6-(5-phosphoribosylamino)uracil reductase [EC:1.1.1.193] |
| GPL_13459_0074 | S-adenosyl-L-homocysteine hydrolase (EC:3.3.1.1); K01251 adenosylhomocysteinase [EC:3.3.1.1]                                                                  |
| GPL_13459_0073 | cofactor-independent phosphoglycerate mutase (EC:5.4.2.1); K01834 phosphoglycerate mutase [EC:5.4.2.1]                                                        |
| GPL_13459_0072 | phosphoglucomutase/phosphomannomutase (EC:5.4.2.8 5.4.2.2); K01835 phosphoglucomutase [EC:5.4.2.2]; K01840 phosphomannomutase [EC:5.4.2.8]                    |
| GPL_13459_0070 | ef1B; elongation factor 1-beta; K03232 elongation factor EF-1 beta subunit                                                                                    |
| GPL_13459_0069 | hypothetical protein                                                                                                                                          |
| GPL_13459_0067 | alaS; alanyl-tRNA synthetase (EC:6.1.1.7); K01872 alanyl-tRNA synthetase [EC:6.1.1.7]                                                                         |
| GPL_13459_0065 | hypothetical protein                                                                                                                                          |
| GPL_13459_0063 | chorismate synthase (EC:4.2.3.5); K01736 chorismate synthase [EC:4.2.3.5]                                                                                     |
| GPL_13459_0058 | hypothetical protein                                                                                                                                          |
| GPL_13459_0056 | dTDP-glucose pyrophosphorylase; K00973 glucose-1-phosphate thymidyltransferase [EC:2.7.7.24]                                                                  |
| GPL_13459_0055 | dTDP-4-dehydrorhamnose reductase; K00067 dTDP-4-dehydrorhamnose reductase [EC:1.1.1.133]                                                                      |
| GPL_13459_0048 | hypothetical protein                                                                                                                                          |
| GPL_13459_0047 | gcvH; glycine cleavage system protein H; K02437 glycine cleavage system H protein                                                                             |
| GPL_13459_0043 | hypothetical protein                                                                                                                                          |
| GPL_13459_0042 | hemB; delta-aminolevulinic acid dehydratase (EC:4.2.1.24); K01698 porphobilinogen synthase [EC:4.2.1.24]                                                      |
| GPL_13459_0041 | ATPase                                                                                                                                                        |
| GPL_13459_0040 | malate dehydrogenase (EC:1.1.1.37); K00024 malate dehydrogenase [EC:1.1.1.37]                                                                                 |
| GPL_13459_0037 | short-chain dehydrogenase/reductase SDR (EC:1.3.1.34)                                                                                                         |
| GPL_13459_0036 | DNA polymerase sliding clamp; K04802 proliferating cell nuclear antigen                                                                                       |
| GPL_13459_0035 | hypothetical protein                                                                                                                                          |
| GPL_13459_0034 | glycine dehydrogenase subunit 1 (EC:1.4.4.2); K00282 glycine dehydrogenase subunit 1 [EC:1.4.4.2]                                                             |
| GPL_13459_0033 | glycine dehydrogenase subunit 2 (EC:1.4.4.2); K00283 glycine dehydrogenase subunit 2 [EC:1.4.4.2]                                                             |

|                |                                                                                                                            |
|----------------|----------------------------------------------------------------------------------------------------------------------------|
| GPL_13459_0032 | hypothetical protein; K09746 hypothetical protein                                                                          |
| GPL_13459_0031 | replication factor A; K07466 replication factor A1                                                                         |
| GPL_13459_0030 | 5'-methylthioadenosine phosphorylase II (EC:2.4.2.28); K00772 5'-methylthioadenosine phosphorylase [EC:2.4.2.28]           |
| GPL_13459_0029 | hypothetical protein; K07577 putative mRNA 3-end processing factor                                                         |
| GPL_13459_0027 | sulfolipid biosynthesis protein                                                                                            |
| GPL_13459_0026 | peptidase S8/S53 subtilisin kexin sedolisin                                                                                |
| GPL_13459_0014 | pgk; phosphoglycerate kinase (EC:2.7.2.3); K00927 phosphoglycerate kinase [EC:2.7.2.3]                                     |
| GPL_13459_0013 | NUDIX hydrolase                                                                                                            |
| GPL_13459_0010 | 50S ribosomal protein L15e; K02877 large subunit ribosomal protein L15e                                                    |
| GPL_13459_0009 | replication factor C large subunit; K04800 replication factor C large subunit                                              |
| GPL_13459_0008 | kinase related to galactokinase and mevalonate kinase; K07031                                                              |
| GPL_13459_0006 | chaperonin GroEL                                                                                                           |
| GPL_13459_0004 | acyl-CoA dehydrogenase; K00249 acyl-CoA dehydrogenase [EC:1.3.99.3]                                                        |
| GPL_13459_0002 | inorganic pyrophosphatase; K01507 inorganic pyrophosphatase [EC:3.6.1.1]                                                   |
| GPL_13455_0104 | hypothetical protein                                                                                                       |
| GPL_13455_0103 | CRISPR-associated protein                                                                                                  |
| GPL_13455_0102 | hypothetical protein                                                                                                       |
| GPL_13455_0101 | CRISPR-associated helicase Cas3; K07012                                                                                    |
| GPL_13455_0100 | hypothetical protein                                                                                                       |
| GPL_13455_0097 | trehalose/maltose transport ATP-hydrolyzing subunit Malk; K02023 multiple sugar transport system ATP-binding protein       |
| GPL_13455_0094 | trehalose/maltose binding protein (MalE) related protein; K02027 multiple sugar transport system substrate-binding protein |
| GPL_13455_0089 | GntR family transcriptional regulator                                                                                      |
| GPL_13455_0088 | electron transfer flavoprotein subunit alpha; K03522 electron transfer flavoprotein alpha subunit                          |
| GPL_13455_0087 | electron transfer flavoprotein subunit beta; K03521 electron transfer flavoprotein beta subunit                            |
| GPL_13455_0085 | FixC protein related; K00313 electron transfer flavoprotein-quinone oxidoreductase [EC:1.5.5.-]                            |
| GPL_13455_0081 | spermidine synthase (EC:2.5.1.16); K00797 spermidine synthase [EC:2.5.1.16]                                                |
| GPL_13455_0076 | pirin-related protein; K06911                                                                                              |
| GPL_13455_0073 | 3-isopropylmalate dehydratase, small subunit; K01705 homoaconitate hydratase [EC:4.2.1.36]                                 |
| GPL_13455_0069 | 30S ribosomal protein S6e; K02991 small subunit ribosomal protein S6e                                                      |

|                |                                                                                                                                                                                                       |
|----------------|-------------------------------------------------------------------------------------------------------------------------------------------------------------------------------------------------------|
| GPL_13455_0068 | translation initiation factor IF-2 subunit gamma; K03242 translation initiation factor eIF-2 gamma subunit                                                                                            |
| GPL_13455_0066 | DNA-binding protein                                                                                                                                                                                   |
| GPL_13455_0065 | hypothetical protein                                                                                                                                                                                  |
| GPL_13455_0064 | hypothetical protein; K01151 deoxyribonuclease IV [EC:3.1.21.2]                                                                                                                                       |
| GPL_13455_0063 | DNA primase                                                                                                                                                                                           |
| GPL_13455_0062 | hypothetical protein; K01338 ATP-dependent Lon protease [EC:3.4.21.53]                                                                                                                                |
| GPL_13455_0061 | putative peroxiredoxin (EC:1.11.1.15); K03386 peroxiredoxin (alkyl hydroperoxide reductase subunit C) [EC:1.11.1.15]                                                                                  |
| GPL_13455_0058 | hypothetical protein                                                                                                                                                                                  |
| GPL_13455_0057 | sec-independent protein secretion pathway component; K03116 sec-independent protein translocase protein TatA                                                                                          |
| GPL_13455_0054 | hypothetical protein                                                                                                                                                                                  |
| GPL_13455_0053 | hypothetical protein                                                                                                                                                                                  |
| GPL_13455_0044 | NADH dehydrogenase subunit I (EC:1.6.5.3); K00338 NADH dehydrogenase I subunit I [EC:1.6.5.3]                                                                                                         |
| GPL_13455_0042 | NADH dehydrogenase subunit D (EC:1.6.5.3); K00333 NADH dehydrogenase I subunit D [EC:1.6.5.3]                                                                                                         |
| GPL_13455_0041 | NADH dehydrogenase subunit C (EC:1.6.5.3); K00332 NADH dehydrogenase I subunit C [EC:1.6.5.3]                                                                                                         |
| GPL_13455_0038 | glutamyl-tRNA(Gln) amidotransferase subunit E; K03330 glutamyl-tRNA(Gln) amidotransferase subunit E [EC:6.3.5.7]                                                                                      |
| GPL_13455_0037 | L-asparaginase, type I; K09482 glutamyl-tRNA(Gln) amidotransferase subunit D [EC:6.3.5.7]                                                                                                             |
| GPL_13455_0035 | acyl-CoA dehydrogenase; K00257 [EC:1.3.99.-]                                                                                                                                                          |
| GPL_13455_0034 | purine phosphoribosyltransferase related protein; K07101                                                                                                                                              |
| GPL_13455_0032 | hypothetical protein                                                                                                                                                                                  |
| GPL_13455_0031 | hypothetical protein                                                                                                                                                                                  |
| GPL_13455_0023 | Fe-S oxidoreductase                                                                                                                                                                                   |
| GPL_13455_0021 | DNA polymerase I (EC:2.7.7.7); K02319 DNA polymerase I [EC:2.7.7.7]                                                                                                                                   |
| GPL_13455_0014 | argS; arginyl-tRNA synthetase (EC:6.1.1.19); K01887 arginyl-tRNA synthetase [EC:6.1.1.19]                                                                                                             |
| GPL_13455_0013 | hypothetical protein                                                                                                                                                                                  |
| GPL_13455_0009 | hypothetical protein                                                                                                                                                                                  |
| GPL_13455_0005 | rfc; replication factor C small subunit; K04801 replication factor C small subunit                                                                                                                    |
| GPL_13455_0003 | hypothetical protein                                                                                                                                                                                  |
| GPL_13447_0034 | argC; N-acetyl-gamma-glutamyl-phosphate reductase (EC:1.2.1.38); K00145 N-acetyl-gamma-glutamyl-phosphate reductase [EC:1.2.1.38]; K05829 N-acetyl-gamma-aminoadipyl-phosphate reductase [EC:1.2.1.-] |
| GPL_13447_0033 | acetylglutamate kinase; K00930 acetylglutamate kinase [EC:2.7.2.8]; K05828 acetylaminoadipate kinase [EC:2.7.2.-]                                                                                     |

|                |                                                                                                                                                         |
|----------------|---------------------------------------------------------------------------------------------------------------------------------------------------------|
| GPL_13447_0032 | acetylornithine aminotransferase (EC:2.6.1.11); K05830 acetylornithine/acetyl-lysine aminotransferase [EC:2.6.1.11 2.6.1.-]                             |
| GPL_13447_0031 | RimK-like protein; K05827 lysine biosynthesis protein LysX                                                                                              |
| GPL_13447_0029 | 3-isopropylmalate dehydratase large subunit (EC:4.2.1.33); K01703 3-isopropylmalate/(R)-2-methylmalate dehydratase large subunit [EC:4.2.1.33 4.2.1.35] |
| GPL_13447_0010 | subtilase family protein                                                                                                                                |
| GPL_13374_0232 | hypothetical protein                                                                                                                                    |
| GPL_13374_0206 | hypothetical protein                                                                                                                                    |
| GPL_13374_0202 | DNA-directed RNA polymerase subunit E'; K03049 DNA-directed RNA polymerase subunit E' [EC:2.7.7.6]                                                      |
| GPL_13374_0200 | hypothetical protein; K09735 hypothetical protein                                                                                                       |
| GPL_13374_0199 | rps24e; 30S ribosomal protein S24e; K02974 small subunit ribosomal protein S24e                                                                         |
| GPL_13374_0198 | hypothetical protein                                                                                                                                    |
| GPL_13374_0194 | hypothetical protein; K03724 ATP-dependent helicase Lhr and Lhr-like helicase [EC:3.6.1.-]                                                              |
| GPL_13374_0187 | hypothetical protein                                                                                                                                    |
| GPL_13374_0186 | ATPase; K03924 MoxR-like ATPase [EC:3.6.3.-]                                                                                                            |
| GPL_13374_0183 | hypothetical protein                                                                                                                                    |
| GPL_13374_0182 | ATP-dependent protease Lon; K04076 Lon-like ATP-dependent protease [EC:3.4.21.-]                                                                        |
| GPL_13374_0180 | ribokinase related protein; K00852 ribokinase [EC:2.7.1.15]                                                                                             |
| GPL_13374_0179 | acetyltransferase                                                                                                                                       |
| GPL_13374_0178 | eno; phosphopyruvate hydratase (EC:4.2.1.11); K01689 enolase [EC:4.2.1.11]                                                                              |
| GPL_13374_0176 | putative phosphatidylethanolamine-binding protein; K06910                                                                                               |
| GPL_13374_0175 | GTP:adenosylcobinamide-phosphate guanylyltransferase                                                                                                    |
| GPL_13374_0167 | malA; alpha-glucosidase (EC:3.2.1.20); K01187 alpha-glucosidase [EC:3.2.1.20]                                                                           |
| GPL_13374_0164 | succinate-semialdehyde dehydrogenase [NADP+] (EC:1.2.1.16); K00135 succinate-semialdehyde dehydrogenase (NADP+) [EC:1.2.1.16]                           |
| GPL_13374_0162 | hypothetical protein                                                                                                                                    |
| GPL_13374_0156 | ctaD; cytochrome c oxidase subunit I; K02274 cytochrome c oxidase subunit I [EC:1.9.3.1]                                                                |
| GPL_13374_0153 | transcription factor; K03627 putative transcription factor                                                                                              |
| GPL_13374_0151 | TPR repeat-containing protein                                                                                                                           |
| GPL_13374_0148 | rps15p; 30S ribosomal protein S15P; K02956 small subunit ribosomal protein S15                                                                          |
| GPL_13374_0141 | hypothetical protein; K07151 dolichyl-diphosphooligosaccharide--protein glycosyltransferase [EC:2.4.1.119]                                              |
| GPL_13374_0140 | pheT; phenylalanyl-tRNA synthetase subunit beta (EC:6.1.1.20); K01890 phenylalanyl-tRNA synthetase beta chain [EC:6.1.1.20]                             |

|                |                                                                                                                   |
|----------------|-------------------------------------------------------------------------------------------------------------------|
| GPL_13374_0139 | hypothetical protein; K07722 CopG family transcriptional regulator, nickel-responsive regulator                   |
| GPL_13374_0138 | hypothetical protein; K06937                                                                                      |
| GPL_13374_0136 | pyruvoyl-dependent arginine decarboxylase (EC:4.1.1.19); K02626 arginine decarboxylase [EC:4.1.1.19]              |
| GPL_13374_0134 | short chain dehydrogenase                                                                                         |
| GPL_13374_0131 | short chain dehydrogenase                                                                                         |
| GPL_13374_0128 | aldehyde dehydrogenase related protein; K00294 1-pyrroline-5-carboxylate dehydrogenase [EC:1.5.1.12]              |
| GPL_13374_0126 | phosphoenolpyruvate carboxykinase (EC:4.1.1.32); K01596 phosphoenolpyruvate carboxykinase (GTP) [EC:4.1.1.32]     |
| GPL_13374_0122 | translation initiation factor IF-2; K03243 translation initiation factor IF-2 unclassified subunit                |
| GPL_13374_0121 | ndk; nucleoside diphosphate kinase; K00940 nucleoside-diphosphate kinase [EC:2.7.4.6]                             |
| GPL_13374_0119 | rps28e; 30S ribosomal protein S28e; K02979 small subunit ribosomal protein S28e                                   |
| GPL_13374_0118 | rpl7ae; 50S ribosomal protein L7Ae; K02936 large subunit ribosomal protein L7Ae                                   |
| GPL_13374_0117 | dihydrodipicolinate synthetase; K01714 dihydrodipicolinate synthase [EC:4.2.1.52]                                 |
| GPL_13374_0114 | exosome complex RNA-binding protein Csl4; K07573 exosome complex component CSL4                                   |
| GPL_13374_0112 | small nuclear ribonucleoprotein (snRNP)-like protein                                                              |
| GPL_13374_0108 | carboxymethylenebutenolidase (EC:3.1.1.45); K01061 carboxymethylenebutenolidase [EC:3.1.1.45]                     |
| GPL_13374_0107 | ornithine carbamoyltransferase (EC:2.1.3.3); K00611 ornithine carbamoyltransferase [EC:2.1.3.3]                   |
| GPL_13374_0106 | succinyl-CoA synthetase subunit alpha (EC:6.2.1.5); K01902 succinyl-CoA synthetase alpha subunit [EC:6.2.1.5]     |
| GPL_13374_0105 | sucC; succinyl-CoA synthetase subunit beta (EC:6.2.1.5); K01903 succinyl-CoA synthetase beta subunit [EC:6.2.1.5] |
| GPL_13374_0104 | thermosome, alpha chain                                                                                           |
| GPL_13374_0103 | alternative thymidylate synthase                                                                                  |
| GPL_13374_0102 | hypothetical protein; K07068                                                                                      |
| GPL_13374_0101 | acetyl-CoA acetyltransferase (EC:2.3.1.9); K00626 acetyl-CoA C-acetyltransferase [EC:2.3.1.9]                     |
| GPL_13374_0100 | sugar ABC transporter extracellular solute binding protein                                                        |
| GPL_13374_0098 | sugar ABC transporter ATP binding protein                                                                         |
| GPL_13374_0097 | HAD superfamily hydrolase                                                                                         |
| GPL_13374_0096 | thioesterase; K07107                                                                                              |
| GPL_13374_0094 | hypothetical protein                                                                                              |
| GPL_13374_0093 | hypothetical protein                                                                                              |
| GPL_13374_0091 | VAT ATPase (VCP-like ATPase); K13525 transitional endoplasmic reticulum ATPase                                    |
| GPL_13374_0090 | hypothetical protein                                                                                              |

|                |                                                                                                                                               |
|----------------|-----------------------------------------------------------------------------------------------------------------------------------------------|
| GPL_13374_0089 | peptide chain release factor 1; K03265 peptide chain release factor eRF subunit 1                                                             |
| GPL_13374_0088 | pyrH; uridylyate kinase; K09903 uridylyate kinase [EC:2.7.4.22]                                                                               |
| GPL_13374_0087 | 2-oxoglutarate ferredoxin oxidoreductase subunit beta (EC:1.2.7.3); K00175 2-oxoglutarate ferredoxin oxidoreductase subunit beta [EC:1.2.7.3] |
| GPL_13374_0086 | 2-oxoacid ferredoxin oxidoreductase subunit alpha; K00174 2-oxoglutarate ferredoxin oxidoreductase subunit alpha [EC:1.2.7.3]                 |
| GPL_13374_0085 | hypothetical protein                                                                                                                          |
| GPL_13374_0084 | phosphoribosylformylglycinamide synthase I (EC:6.3.5.3); K01952 phosphoribosylformylglycinamide synthase [EC:6.3.5.3]                         |
| GPL_13374_0081 | hypothetical protein                                                                                                                          |
| GPL_13374_0078 | heat shock protein                                                                                                                            |
| GPL_13374_0075 | DNA-directed RNA polymerase subunit L (EC:2.7.7.6); K03056 DNA-directed RNA polymerase subunit L [EC:2.7.7.6]                                 |
| GPL_13374_0072 | NAD(FAD)-dependent dehydrogenase                                                                                                              |
| GPL_13374_0071 | hypothetical protein                                                                                                                          |
| GPL_13374_0069 | threonine synthase (EC:4.2.3.1); K01733 threonine synthase [EC:4.2.3.1]                                                                       |
| GPL_13374_0068 | fusA; elongation factor EF-2; K03234 elongation factor EF-2 [EC:3.6.5.3]                                                                      |
| GPL_13374_0067 | rps10p; 30S ribosomal protein S10P; K02946 small subunit ribosomal protein S10                                                                |
| GPL_13374_0066 | ef1a, tuf; elongation factor 1-alpha (EC:3.6.5.3); K03231 elongation factor EF-1 alpha subunit [EC:3.6.5.3]                                   |
| GPL_13374_0065 | 30S ribosomal protein S3Ae; K02984 small subunit ribosomal protein S3Ae                                                                       |
| GPL_13374_0062 | transcription regulator                                                                                                                       |
| GPL_13374_0061 | asparagine synthetase A (EC:6.1.1.22); K01893 asparaginyl-tRNA synthetase [EC:6.1.1.22]                                                       |
| GPL_13374_0060 | ATPase; K06865                                                                                                                                |
| GPL_13374_0052 | hypothetical protein                                                                                                                          |
| GPL_13374_0047 | glutamate decarboxylase; K01580 glutamate decarboxylase [EC:4.1.1.15]                                                                         |
| GPL_13374_0045 | bcp-1; peroxiredoxin; K03564 peroxiredoxin Q/BCP [EC:1.11.1.15]                                                                               |
| GPL_13374_0033 | translation initiation factor IF-5A; K03263 translation initiation factor eIF-5A                                                              |
| GPL_13374_0032 | agmatinase; K01480 agmatinase [EC:3.5.3.11]                                                                                                   |
| GPL_13374_0030 | rpl10e; 50S ribosomal protein L10e; K02866 large subunit ribosomal protein L10e                                                               |
| GPL_13374_0027 | hypothetical protein; K07050                                                                                                                  |
| GPL_13374_0026 | tetrahydrofolylpolyglutamate synthase related protein; K11754 dihydrofolate synthase / folylpolyglutamate synthase [EC:6.3.2.12 6.3.2.17]     |
| GPL_13374_0024 | metal-dependent hydrolase                                                                                                                     |

|                |                                                                                                                                                                                                               |
|----------------|---------------------------------------------------------------------------------------------------------------------------------------------------------------------------------------------------------------|
| GPL_13374_0022 | pyridoxal biosynthesis lyase PdxS; K06215 pyridoxine biosynthesis protein [EC:4.-.-.-]                                                                                                                        |
| GPL_13374_0020 | enoyl-CoA hydratase                                                                                                                                                                                           |
| GPL_13374_0018 | Rieske Fe-S protein                                                                                                                                                                                           |
| GPL_13374_0014 | cysteine desulfurase (EC:4.4.1.-)                                                                                                                                                                             |
| GPL_13374_0011 | hypothetical protein                                                                                                                                                                                          |
| GPL_13374_0008 | aldo/keto reductase (EC:1.1.1.91)                                                                                                                                                                             |
| GPL_13334_0195 | transposase, IS4                                                                                                                                                                                              |
| GPL_13334_0193 | NADH oxidoreductase (EC:1.-.-.-); K00540 [EC:1.-.-.-]                                                                                                                                                         |
| GPL_13334_0191 | ribose-phosphate pyrophosphokinase (EC:2.7.6.1); K00948 ribose-phosphate pyrophosphokinase [EC:2.7.6.1]                                                                                                       |
| GPL_13334_0190 | crt; 3-hydroxybutyryl-CoA dehydratase                                                                                                                                                                         |
| GPL_13334_0187 | iron-dependent transcription repressor related protein                                                                                                                                                        |
| GPL_13334_0184 | multidrug resistance ABC transporter ATP-binding and permease protein; K06147 ATP-binding cassette, subfamily B, bacterial                                                                                    |
| GPL_13334_0183 | domain of unknown function DUF1731; K07071                                                                                                                                                                    |
| GPL_13334_0182 | acetyl-CoA acetyltransferase (EC:2.3.1.16); K00626 acetyl-CoA C-acetyltransferase [EC:2.3.1.9]                                                                                                                |
| GPL_13334_0166 | universal stress protein UspA-like protein                                                                                                                                                                    |
| GPL_13334_0165 | aspA; aspartate ammonia-lyase (EC:4.3.1.1); K01679 fumarate hydratase, class II [EC:4.2.1.2]                                                                                                                  |
| GPL_13334_0164 | methyltransferase type 11                                                                                                                                                                                     |
| GPL_13334_0163 | amidohydrolase                                                                                                                                                                                                |
| GPL_13334_0158 | 6-phosphogluconate dehydrogenase NAD-binding; K00020 3-hydroxyisobutyrate dehydrogenase [EC:1.1.1.31]                                                                                                         |
| GPL_13334_0156 | phosphopantothencysteine decarboxylase/phosphopantothenate--cysteine ligase (EC:4.1.1.36 6.3.2.5); K13038 phosphopantothencysteine decarboxylase / phosphopantothenate--cysteine ligase [EC:4.1.1.36 6.3.2.5] |
| GPL_13334_0145 | SoxB-like sarcosine oxidase, beta subunit related                                                                                                                                                             |
| GPL_13334_0141 | metal-binding protein                                                                                                                                                                                         |
| GPL_13334_0139 | tryptophanyl-tRNA synthetase (EC:6.1.1.2); K01867 tryptophanyl-tRNA synthetase [EC:6.1.1.2]                                                                                                                   |
| GPL_13334_0138 | ornithine cyclodeaminase (EC:4.3.1.12); K01750 ornithine cyclodeaminase [EC:4.3.1.12]                                                                                                                         |
| GPL_13334_0135 | hypothetical protein                                                                                                                                                                                          |
| GPL_13334_0133 | cbiA-2; cobyrinic acid a,c-diamide synthase (EC:6.3.5.9); K02224 cobyrinic acid a,c-diamide synthase [EC:6.3.5.9 6.3.1.-]                                                                                     |
| GPL_13334_0132 | ilvE; branched-chain amino acid aminotransferase (EC:2.6.1.42); K00826 branched-chain amino acid aminotransferase [EC:2.6.1.42]                                                                               |
| GPL_13334_0129 | electron transfer flavoprotein subunit alpha; K03522 electron transfer flavoprotein alpha subunit                                                                                                             |
| GPL_13334_0128 | electron transfer flavoprotein subunit beta; K03521 electron transfer flavoprotein beta subunit                                                                                                               |



|                |                                                                                                                                         |
|----------------|-----------------------------------------------------------------------------------------------------------------------------------------|
| GPL_13334_0127 | acetyl-CoA acetyltransferase (EC:2.3.1.9); K00626 acetyl-CoA C-acetyltransferase [EC:2.3.1.9]                                           |
| GPL_13334_0125 | acyl-CoA dehydrogenase; K00249 acyl-CoA dehydrogenase [EC:1.3.99.3]                                                                     |
| GPL_13334_0124 | acyl-CoA dehydrogenase-like protein                                                                                                     |
| GPL_13334_0120 | trehalose synthase (EC:5.4.99.16); K05343 maltose alpha-D-glucosyltransferase [EC:5.4.99.16]                                            |
| GPL_13334_0118 | 1,4-alpha-glucan branching enzyme (EC:2.4.1.18); K00700 1,4-alpha-glucan branching enzyme [EC:2.4.1.18]                                 |
| GPL_13334_0116 | chromosome partitioning ATPase; K03593 ATP-binding protein involved in chromosome partitioning                                          |
| GPL_13334_0112 | transcriptional regulatory protein                                                                                                      |
| GPL_13334_0108 | citrate synthase; K01647 citrate synthase [EC:2.3.3.1]                                                                                  |
| GPL_13334_0107 | PadR family transcriptional regulator                                                                                                   |
| GPL_13334_0105 | sugar kinase                                                                                                                            |
| GPL_13334_0104 | glutamine synthetase; K01915 glutamine synthetase [EC:6.3.1.2]                                                                          |
| GPL_13334_0103 | 30S ribosomal protein S19e; K02966 small subunit ribosomal protein S19e                                                                 |
| GPL_13334_0102 | hypothetical protein; K06875                                                                                                            |
| GPL_13334_0100 | 50S ribosomal protein L31e; K02910 large subunit ribosomal protein L31e                                                                 |
| GPL_13334_0098 | pyrE; orotate phosphoribosyltransferase (EC:2.4.2.10); K00762 orotate phosphoribosyltransferase [EC:2.4.2.10]                           |
| GPL_13334_0097 | fumarylacetoacetate (FAA) hydrolase                                                                                                     |
| GPL_13334_0094 | hypothetical protein                                                                                                                    |
| GPL_13334_0093 | mannose-1-phosphate guanyltransferase (EC:2.7.7.13); K00966 mannose-1-phosphate guanylyltransferase [EC:2.7.7.13]                       |
| GPL_13334_0092 | hutU; urocanate hydratase (EC:4.2.1.49); K01712 urocanate hydratase [EC:4.2.1.49]                                                       |
| GPL_13334_0090 | acylaminoacyl-peptidase                                                                                                                 |
| GPL_13334_0079 | aldo/keto reductase                                                                                                                     |
| GPL_13334_0078 | acetyl-coenzyme-A synthetase; K01895 acetyl-CoA synthetase [EC:6.2.1.1]                                                                 |
| GPL_13334_0073 | methionine synthase; K00549 5-methyltetrahydropteroyltriglutamate--homocysteine methyltransferase [EC:2.1.1.14]                         |
| GPL_13334_0072 | hypothetical protein                                                                                                                    |
| GPL_13334_0069 | hypothetical protein                                                                                                                    |
| GPL_13334_0067 | tricorn protease interacting factor F2 (EC:3.4.11.-); K13722 tricorn protease interacting factor F2/3 [EC:3.4.11.-]                     |
| GPL_13334_0059 | ribonucleotide-diphosphate reductase subunit alpha (EC:1.17.4.1); K00525 ribonucleoside-diphosphate reductase alpha chain [EC:1.17.4.1] |
| GPL_13334_0057 | aminomethyltransferase (glycine cleavage system T protein); K00605 aminomethyltransferase [EC:2.1.2.10]                                 |
| GPL_13334_0055 | glyA; serine hydroxymethyltransferase (EC:2.1.2.1); K00600 glycine hydroxymethyltransferase [EC:2.1.2.1]                                |

|                |                                                                                                                                                                                                                                    |
|----------------|------------------------------------------------------------------------------------------------------------------------------------------------------------------------------------------------------------------------------------|
| GPL_13334_0054 | RecA-superfamily ATPase implicated in signal transduction-like protein                                                                                                                                                             |
| GPL_13334_0053 | galactonate dehydratase                                                                                                                                                                                                            |
| GPL_13334_0052 | DNA topoisomerase I (EC:5.99.1.2); K03168 DNA topoisomerase I [EC:5.99.1.2]                                                                                                                                                        |
| GPL_13334_0050 | tricorn protease; K08676 tricorn protease [EC:3.4.21.-]                                                                                                                                                                            |
| GPL_13334_0048 | purH; bifunctional phosphoribosylaminoimidazolecarboxamide formyltransferase/IMP cyclohydrolase (EC:3.5.4.10 2.1.2.3); K00602 phosphoribosylaminoimidazolecarboxamide formyltransferase / IMP cyclohydrolase [EC:2.1.2.3 3.5.4.10] |
| GPL_13334_0047 | S-adenosylmethionine synthetase (EC:2.5.1.6); K00789 S-adenosylmethionine synthetase [EC:2.5.1.6]                                                                                                                                  |
| GPL_13334_0042 | hypothetical protein                                                                                                                                                                                                               |
| GPL_13334_0040 | hypothetical protein; K09716 hypothetical protein                                                                                                                                                                                  |
| GPL_13334_0039 | hypothetical protein                                                                                                                                                                                                               |
| GPL_13334_0038 | valS; valyl-tRNA synthetase (EC:6.1.1.9); K01873 valyl-tRNA synthetase [EC:6.1.1.9]                                                                                                                                                |
| GPL_13334_0035 | 4-aminobutyrate aminotransferase (EC:2.6.1.19); K00823 4-aminobutyrate aminotransferase [EC:2.6.1.19]                                                                                                                              |
| GPL_13334_0034 | hypothetical protein                                                                                                                                                                                                               |
| GPL_13334_0033 | acyl-coenzyme A synthetase; K01895 acetyl-CoA synthetase [EC:6.2.1.1]                                                                                                                                                              |
| GPL_13334_0028 | pyrG; CTP synthetase (EC:6.3.4.2); K01937 CTP synthase [EC:6.3.4.2]                                                                                                                                                                |
| GPL_13334_0026 | GTPase; K06883                                                                                                                                                                                                                     |
| GPL_13334_0024 | hypothetical protein                                                                                                                                                                                                               |
| GPL_13334_0022 | superoxide dismutase; K04564 superoxide dismutase, Fe-Mn family [EC:1.15.1.1]                                                                                                                                                      |
| GPL_13334_0021 | phospholipase D                                                                                                                                                                                                                    |
| GPL_13334_0017 | hypothetical protein                                                                                                                                                                                                               |
| GPL_13334_0016 | V-type ATP synthase subunit C (EC:3.6.3.14); K02119 V-type H <sup>+</sup> -transporting ATPase subunit C [EC:3.6.3.14]                                                                                                             |
| GPL_13334_0015 | V-type ATP synthase subunit F (EC:3.6.3.14); K02122 V-type H <sup>+</sup> -transporting ATPase subunit F [EC:3.6.3.14]                                                                                                             |
| GPL_13334_0014 | atpA; V-type ATP synthase subunit A (EC:3.6.3.14); K02117 V-type H <sup>+</sup> -transporting ATPase subunit A [EC:3.6.3.14]                                                                                                       |
| GPL_13334_0013 | V-type ATP synthase subunit B (EC:3.6.3.14); K02118 V-type H <sup>+</sup> -transporting ATPase subunit B [EC:3.6.3.14]                                                                                                             |
| GPL_13334_0012 | V-type ATP synthase subunit D (EC:3.6.3.14); K02120 V-type H <sup>+</sup> -transporting ATPase subunit D [EC:3.6.3.14]                                                                                                             |
| GPL_13334_0011 | hypothetical protein                                                                                                                                                                                                               |
| GPL_13334_0010 | V-type ATP synthase subunit I (EC:3.6.3.14); K02123 V-type H <sup>+</sup> -transporting ATPase subunit I [EC:3.6.3.14]                                                                                                             |
| GPL_13334_0007 | hypothetical protein                                                                                                                                                                                                               |
| GPL_13334_0006 | UDP-glucose 4-epimerase (EC:5.1.3.2); K01784 UDP-glucose 4-epimerase [EC:5.1.3.2]                                                                                                                                                  |
| GPL_13334_0004 | isopentenyl pyrophosphate isomerase (EC:5.3.3.2); K01823 isopentenyl-diphosphate delta-isomerase [EC:5.3.3.2]                                                                                                                      |

|                |                                                                                                                                                              |
|----------------|--------------------------------------------------------------------------------------------------------------------------------------------------------------|
| GPL_13327_0080 | hypothetical protein                                                                                                                                         |
| GPL_13327_0079 | metal-dependent RNase; K07041                                                                                                                                |
| GPL_13327_0078 | proteasome, beta chain; K03433 proteasome beta subunit [EC:3.4.25.1]                                                                                         |
| GPL_13327_0077 | inosine-5'-monophosphate dehydrogenase related protein                                                                                                       |
| GPL_13327_0075 | hypothetical protein                                                                                                                                         |
| GPL_13327_0074 | hemH; phosphoribosylaminoimidazole-succinocarboxamide synthase (EC:6.3.2.6); K01923<br>phosphoribosylaminoimidazole-succinocarboxamide synthase [EC:6.3.2.6] |
| GPL_13327_0073 | hypothetical protein; K07145                                                                                                                                 |
| GPL_13327_0072 | peptidyl-prolyl cis-trans isomerase (EC:5.2.1.8); K01802 peptidylprolyl isomerase [EC:5.2.1.8]                                                               |
| GPL_13327_0071 | nicotinate phosphoribosyltransferase (EC:2.4.2.11); K00763 nicotinate phosphoribosyltransferase [EC:2.4.2.11]                                                |
| GPL_13327_0069 | cysS; cysteinyl-tRNA synthetase (EC:6.1.1.16); K01883 cysteinyl-tRNA synthetase [EC:6.1.1.16]                                                                |
| GPL_13327_0068 | hypothetical protein                                                                                                                                         |
| GPL_13327_0067 | hypothetical protein                                                                                                                                         |
| GPL_13327_0066 | hypothetical protein                                                                                                                                         |
| GPL_13327_0064 | NADH peroxidase related protein; K00359 NADH oxidase [EC:1.6.-.-]                                                                                            |
| GPL_13327_0060 | hypothetical protein                                                                                                                                         |
| GPL_13327_0058 | hypothetical protein                                                                                                                                         |
| GPL_13327_0057 | hypothetical protein                                                                                                                                         |
| GPL_13327_0056 | hypothetical protein                                                                                                                                         |
| GPL_13327_0055 | hypothetical protein                                                                                                                                         |
| GPL_13327_0054 | hypothetical protein                                                                                                                                         |
| GPL_13327_0053 | ATPase of the AAA+ class involved in cell division                                                                                                           |
| GPL_13327_0052 | hypothetical protein                                                                                                                                         |
| GPL_13327_0049 | heat shock protein GrpE related protein; K03687 molecular chaperone GrpE                                                                                     |
| GPL_13327_0048 | dnaK; molecular chaperone DnaK; K04043 molecular chaperone DnaK                                                                                              |
| GPL_13327_0047 | chaperone protein DnaJ; K03686 molecular chaperone DnaJ                                                                                                      |
| GPL_13327_0045 | universal stress protein                                                                                                                                     |
| GPL_13327_0037 | rps17E; 30S ribosomal protein S17e; K02962 small subunit ribosomal protein S17e                                                                              |
| GPL_13327_0034 | ileS; isoleucyl-tRNA synthetase (EC:6.1.1.5); K01870 isoleucyl-tRNA synthetase [EC:6.1.1.5]                                                                  |
| GPL_13327_0031 | winged helix-turn-helix domain-containing protein/riboflavin kinase; K07732 riboflavin kinase, archaea type<br>[EC:2.7.1.161]                                |
| GPL_13327_0029 | phosphoribosylformylglycinamide synthase II (EC:6.3.5.3); K01952 phosphoribosylformylglycinamide synthase                                                    |

|                |                                                                                                                                                                      |
|----------------|----------------------------------------------------------------------------------------------------------------------------------------------------------------------|
|                | [EC:6.3.5.3]                                                                                                                                                         |
| GPL_13327_0028 | phosphoribosylformylglycinamide synthase (EC:6.3.5.3); K01952 phosphoribosylformylglycinamide synthase [EC:6.3.5.3]                                                  |
| GPL_13327_0027 | geranylgeranylgeranyl glycerol phosphate synthase-like protein; K07094                                                                                               |
| GPL_13327_0024 | putative NTPase; K06928                                                                                                                                              |
| GPL_13327_0019 | acyl-CoA hydrolase related protein                                                                                                                                   |
| GPL_13327_0018 | ribose-5-phosphate isomerase A (EC:5.3.1.6); K01807 ribose 5-phosphate isomerase A [EC:5.3.1.6]                                                                      |
| GPL_13327_0017 | AsnC family transcriptional regulator                                                                                                                                |
| GPL_13327_0015 | hypothetical protein                                                                                                                                                 |
| GPL_13327_0014 | glucoamylase (EC:3.2.1.3); K01178 glucoamylase [EC:3.2.1.3]                                                                                                          |
| GPL_13327_0009 | endoribonuclease L-PSP; K07567 TdcF protein                                                                                                                          |
| GPL_13327_0008 | glutamate dehydrogenase; K00261 glutamate dehydrogenase (NAD(P)+) [EC:1.4.1.3]                                                                                       |
| GPL_13327_0007 | alcohol dehydrogenase (EC:1.1.1.1); K13953 alcohol dehydrogenase, propanol-preferring [EC:1.1.1.1]                                                                   |
| GPL_13327_0006 | hypothetical protein                                                                                                                                                 |
| GPL_13317_0005 | sporulation protein (spo0KD) related protein; K02031 peptide/nickel transport system ATP-binding protein; K02032 peptide/nickel transport system ATP-binding protein |
| GPL_13317_0003 | penicillin amidase (EC:3.5.1.11); K07116                                                                                                                             |
| GPL_13296_0125 | thrS; threonyl-tRNA synthetase (EC:6.1.1.3); K01868 threonyl-tRNA synthetase [EC:6.1.1.3]                                                                            |
| GPL_13296_0124 | tricorn protease interacting factor F2 (EC:3.4.11.-); K13722 tricorn protease interacting factor F2/3 [EC:3.4.11.-]                                                  |
| GPL_13296_0123 | exported protein                                                                                                                                                     |
| GPL_13296_0119 | hypothetical protein                                                                                                                                                 |
| GPL_13296_0118 | hypothetical protein                                                                                                                                                 |
| GPL_13296_0117 | hypothetical protein                                                                                                                                                 |
| GPL_13296_0115 | hypothetical protein                                                                                                                                                 |
| GPL_13296_0114 | hutH; histidine ammonia-lyase (EC:4.3.1.3); K01745 histidine ammonia-lyase [EC:4.3.1.3]                                                                              |
| GPL_13296_0110 | amidohydrolase (EC:3.5.1.-); K01463 [EC:3.5.1.-]                                                                                                                     |
| GPL_13296_0109 | hypothetical protein                                                                                                                                                 |
| GPL_13296_0103 | triosephosphate isomerase (EC:5.3.1.1); K01803 triosephosphate isomerase (TIM) [EC:5.3.1.1]                                                                          |
| GPL_13296_0101 | (S)-2-hydroxy-acid oxidase chain D (EC:1.1.3.15); K00104 glycolate oxidase [EC:1.1.3.15]                                                                             |
| GPL_13296_0100 | heterodisulfide reductase related protein                                                                                                                            |
| GPL_13296_0099 | isochorismatase hydrolase                                                                                                                                            |
| GPL_13296_0098 | hypothetical protein                                                                                                                                                 |

|                |                                                                                                                                                       |
|----------------|-------------------------------------------------------------------------------------------------------------------------------------------------------|
| GPL_13296_0096 | rpl3p; 50S ribosomal protein L3P; K02906 large subunit ribosomal protein L3                                                                           |
| GPL_13296_0095 | rpl4lp; 50S ribosomal protein L4P; K02930 large subunit ribosomal protein L4e                                                                         |
| GPL_13296_0094 | rplW; 50S ribosomal protein L23P; K02892 large subunit ribosomal protein L23                                                                          |
| GPL_13296_0093 | rpl2p; 50S ribosomal protein L2P; K02886 large subunit ribosomal protein L2                                                                           |
| GPL_13296_0092 | rps19p; 30S ribosomal protein S19P; K02965 small subunit ribosomal protein S19                                                                        |
| GPL_13296_0091 | rpl22p; 50S ribosomal protein L22P; K02890 large subunit ribosomal protein L22                                                                        |
| GPL_13296_0090 | rps3p; 30S ribosomal protein S3P; K02982 small subunit ribosomal protein S3                                                                           |
| GPL_13296_0086 | rps17p; 30S ribosomal protein S17P; K02961 small subunit ribosomal protein S17                                                                        |
| GPL_13296_0085 | rpl14p; 50S ribosomal protein L14P; K02874 large subunit ribosomal protein L14                                                                        |
| GPL_13296_0084 | rpl24p; 50S ribosomal protein L24P; K02895 large subunit ribosomal protein L24                                                                        |
| GPL_13296_0083 | 30S ribosomal protein S4e; K02987 small subunit ribosomal protein S4e                                                                                 |
| GPL_13296_0082 | rpl5p; 50S ribosomal protein L5P; K02931 large subunit ribosomal protein L5                                                                           |
| GPL_13296_0080 | rps8p; 30S ribosomal protein S8P; K02994 small subunit ribosomal protein S8                                                                           |
| GPL_13296_0079 | rpl6p; 50S ribosomal protein L6P; K02933 large subunit ribosomal protein L6                                                                           |
| GPL_13296_0078 | rpl32e; 50S ribosomal protein L32e; K02912 large subunit ribosomal protein L32e                                                                       |
| GPL_13296_0077 | rpl19e; 50S ribosomal protein L19e; K02885 large subunit ribosomal protein L19e                                                                       |
| GPL_13296_0075 | rps5p; 30S ribosomal protein S5P; K02988 small subunit ribosomal protein S5                                                                           |
| GPL_13296_0074 | rpl30p; 50S ribosomal protein L30P; K02907 large subunit ribosomal protein L30                                                                        |
| GPL_13296_0073 | rpl15p; 50S ribosomal protein L15P; K02876 large subunit ribosomal protein L15                                                                        |
| GPL_13296_0071 | adenylate kinase (EC:2.7.4.3); K00939 adenylate kinase [EC:2.7.4.3]                                                                                   |
| GPL_13296_0068 | H/ACA RNA-protein complex component Cbf5p; K03177 tRNA pseudouridine synthase B [EC:5.4.99.12]                                                        |
| GPL_13296_0065 | small nuclear ribonucleoprotein; K04796 small nuclear ribonucleoprotein                                                                               |
| GPL_13296_0064 | hypothetical protein                                                                                                                                  |
| GPL_13296_0062 | rpl44e; 50S ribosomal protein L44e; K02929 large subunit ribosomal protein L44e                                                                       |
| GPL_13296_0060 | translation initiation factor IF-2 subunit alpha; K03237 translation initiation factor eIF-2 alpha subunit                                            |
| GPL_13296_0058 | hypothetical protein; K07159                                                                                                                          |
| GPL_13296_0055 | nitrilase related protein                                                                                                                             |
| GPL_13296_0053 | alpha, alpha-trehalose-phosphate synthase (UDP-forming) related protein; K00697 alpha, alpha-trehalose-phosphate synthase (UDP-forming) [EC:2.4.1.15] |
| GPL_13296_0050 | translation initiation factor IF-2B subunit alpha; K03239 translation initiation factor eIF-2B alpha subunit                                          |
| GPL_13296_0048 | rpoH; DNA-directed RNA polymerase subunit H (EC:2.7.7.6); K03053 DNA-directed RNA polymerase subunit H [EC:2.7.7.6]                                   |

|                |                                                                                                                                                                                           |
|----------------|-------------------------------------------------------------------------------------------------------------------------------------------------------------------------------------------|
| GPL_13296_0047 | DNA-directed RNA polymerase subunit B (EC:2.7.7.6); K13798 DNA-directed RNA polymerase subunit B [EC:2.7.7.6]                                                                             |
| GPL_13296_0046 | DNA-directed RNA polymerase subunit A' (EC:2.7.7.6); K03041 DNA-directed RNA polymerase subunit A' [EC:2.7.7.6]                                                                           |
| GPL_13296_0045 | DNA-directed RNA polymerase subunit A'' (EC:2.7.7.6); K03042 DNA-directed RNA polymerase subunit A'' [EC:2.7.7.6]                                                                         |
| GPL_13296_0044 | nusA; transcription elongation factor NusA-like protein; K02600 N utilization substance protein A                                                                                         |
| GPL_13296_0043 | TIF11; translation initiation factor IF-1A; K03236 translation initiation factor eIF-1A                                                                                                   |
| GPL_13296_0036 | hypothetical protein                                                                                                                                                                      |
| GPL_13296_0034 | rps13p; 30S ribosomal protein S13P; K02952 small subunit ribosomal protein S13                                                                                                            |
| GPL_13296_0033 | rps4p; 30S ribosomal protein S4P; K02986 small subunit ribosomal protein S4                                                                                                               |
| GPL_13296_0031 | DNA-directed RNA polymerase subunit D (EC:2.7.7.6); K03047 DNA-directed RNA polymerase subunit D [EC:2.7.7.6]                                                                             |
| GPL_13296_0030 | inositol-phosphate phosphatase (EC:3.1.3.25); K01092 myo-inositol-1(or 4)-monophosphatase [EC:3.1.3.25]                                                                                   |
| GPL_13296_0027 | 5-methyltetrahydropteroyltriglutamate--homocysteine methyltransferase, putative (EC:2.1.1.14); K00549 5-methyltetrahydropteroyltriglutamate--homocysteine methyltransferase [EC:2.1.1.14] |
| GPL_13296_0026 | carboxyphosphoenolpyruvate phosphonmutase; K01003 carboxyvinyl-carboxyphosphonate phosphorylmutase [EC:2.7.8.23]                                                                          |
| GPL_13296_0025 | hypothetical protein; K01720 2-methylcitrate dehydratase [EC:4.2.1.79]                                                                                                                    |
| GPL_13296_0023 | D-isomer specific 2-hydroxyacid dehydrogenase NAD-binding protein                                                                                                                         |
| GPL_13296_0022 | hypothetical protein                                                                                                                                                                      |
| GPL_13296_0019 | ubiquinone/menaquinone methyltransferase related protein; K03183 ubiquinone/menaquinone biosynthesis methyltransferase [EC:2.1.1.-]                                                       |
| GPL_13296_0010 | hypothetical protein; K06930                                                                                                                                                              |
| GPL_13296_0009 | pyruvate kinase (EC:2.7.1.40); K00873 pyruvate kinase [EC:2.7.1.40]                                                                                                                       |
| GPL_13296_0008 | FKBP-type peptidyl-prolyl cis-trans isomerase; K01802 peptidylprolyl isomerase [EC:5.2.1.8]                                                                                               |
| GPL_13296_0006 | 50S ribosomal protein L18e; K02883 large subunit ribosomal protein L18e                                                                                                                   |
| GPL_13296_0005 | rpl13p; 50S ribosomal protein L13P; K02871 large subunit ribosomal protein L13                                                                                                            |
| GPL_13296_0004 | rps9p; 30S ribosomal protein S9P; K02996 small subunit ribosomal protein S9                                                                                                               |
| GPL_13296_0003 | DNA-directed RNA polymerase subunit N (EC:2.7.7.6); K03058 DNA-directed RNA polymerase subunit N [EC:2.7.7.6]                                                                             |
| GPL_13290_0191 | hypothetical protein                                                                                                                                                                      |
| GPL_13290_0186 | hypothetical protein                                                                                                                                                                      |
| GPL_13290_0181 | D-3-phosphoglycerate dehydrogenase; K00058 D-3-phosphoglycerate dehydrogenase [EC:1.1.1.95]                                                                                               |

|                |                                                                                                                        |
|----------------|------------------------------------------------------------------------------------------------------------------------|
| GPL_13290_0180 | serine--pyruvate aminotransferase; K00839 aminotransferase [EC:2.6.1.-]                                                |
| GPL_13290_0173 | O-methyltransferase family 3                                                                                           |
| GPL_13290_0166 | hypothetical protein                                                                                                   |
| GPL_13290_0165 | hypothetical protein                                                                                                   |
| GPL_13290_0162 | hypothetical protein                                                                                                   |
| GPL_13290_0154 | VAT-2 protein                                                                                                          |
| GPL_13290_0153 | hypothetical protein                                                                                                   |
| GPL_13290_0151 | AAA ATPase central domain protein                                                                                      |
| GPL_13290_0150 | hypothetical protein                                                                                                   |
| GPL_13290_0148 | hsp 20 family small heat shock protein                                                                                 |
| GPL_13290_0146 | GTPase; K07588 LAO/AO transport system kinase [EC:2.7.-.-]                                                             |
| GPL_13290_0145 | methylmalonyl-CoA mutase alpha subunit (EC:5.4.99.2); K01849 methylmalonyl-CoA mutase, C-terminal domain [EC:5.4.99.2] |
| GPL_13290_0124 | alcohol dehydrogenase GroES domain protein                                                                             |
| GPL_13290_0123 | oxidoreductase                                                                                                         |
| GPL_13290_0121 | hypothetical protein; K09129 hypothetical protein                                                                      |
| GPL_13290_0120 | ABC transporter related protein                                                                                        |
| GPL_13290_0119 | hypothetical protein                                                                                                   |
| GPL_13290_0118 | rubrerythrin                                                                                                           |
| GPL_13290_0114 | peroxiredoxin                                                                                                          |
| GPL_13290_0110 | adenylosuccinate lyase (EC:4.3.2.2); K01756 adenylosuccinate lyase [EC:4.3.2.2]                                        |
| GPL_13290_0106 | hypothetical protein                                                                                                   |
| GPL_13290_0105 | hypothetical protein                                                                                                   |
| GPL_13290_0101 | tfb; transcription initiation factor IIB; K03124 transcription initiation factor TFIIB                                 |
| GPL_13290_0098 | hypothetical protein                                                                                                   |
| GPL_13290_0094 | putative oxidoreductase                                                                                                |
| GPL_13290_0092 | thioredoxin; K03671 thioredoxin 1                                                                                      |
| GPL_13290_0091 | trxB-2; thioredoxin reductase (TrxB-2); K00384 thioredoxin reductase (NADPH) [EC:1.8.1.9]                              |
| GPL_13290_0089 | TPR repeat-containing protein                                                                                          |
| GPL_13290_0087 | enoyl-CoA hydratase; K01692 enoyl-CoA hydratase [EC:4.2.1.17]                                                          |
| GPL_13290_0086 | 3-hydroxybutyryl-CoA dehydrogenase (EC:1.1.1.157); K00074 3-hydroxybutyryl-CoA dehydrogenase [EC:1.1.1.157]            |

|                |                                                                                                                          |
|----------------|--------------------------------------------------------------------------------------------------------------------------|
| GPL_13290_0085 | acetyl-CoA acetyltransferase (EC:2.3.1.9); K00626 acetyl-CoA C-acetyltransferase [EC:2.3.1.9]                            |
| GPL_13290_0084 | rhodanese domain protein                                                                                                 |
| GPL_13290_0081 | hypothetical protein                                                                                                     |
| GPL_13290_0080 | sugar ABC transporter 1, extracellular binding protein; K02027 multiple sugar transport system substrate-binding protein |
| GPL_13290_0079 | sugar ABC transporter 1, ATP binding protein; K02023 multiple sugar transport system ATP-binding protein                 |
| GPL_13290_0075 | long-chain-fatty-acid--CoA ligase (EC:2.3.1.86); K00666 fatty-acyl-CoA synthase [EC:6.2.1.-]                             |
| GPL_13290_0074 | ftsZ; cell division protein FtsZ; K03531 cell division protein FtsZ                                                      |
| GPL_13290_0073 | transketolase; K00615 transketolase [EC:2.2.1.1]                                                                         |
| GPL_13290_0072 | transketolase; K00615 transketolase [EC:2.2.1.1]                                                                         |
| GPL_13290_0071 | putative transaldolase (EC:2.2.1.2); K00616 transaldolase [EC:2.2.1.2]                                                   |
| GPL_13290_0069 | hypothetical protein                                                                                                     |
| GPL_13290_0068 | malate oxidoreductase (malic enzyme); K00027 malate dehydrogenase (oxaloacetate-decarboxylating) [EC:1.1.1.38]           |
| GPL_13290_0067 | hypothetical protein                                                                                                     |
| GPL_13290_0066 | hypothetical protein                                                                                                     |
| GPL_13290_0063 | asnC; asparaginyl-tRNA synthetase (EC:6.1.1.22); K01893 asparaginyl-tRNA synthetase [EC:6.1.1.22]                        |
| GPL_13290_0060 | translation elongation factor (GTPase)                                                                                   |
| GPL_13290_0059 | phosphoribosylamine--glycine ligase (EC:6.3.4.13); K01945 phosphoribosylamine--glycine ligase [EC:6.3.4.13]              |
| GPL_13290_0055 | ribonuclease Z (EC:3.1.26.11); K00784 ribonuclease Z [EC:3.1.26.11]                                                      |
| GPL_13290_0053 | chromosome hypothetical proteinregation protein related ptotein; K03529 chromosome hypothetical proteinregation protein  |
| GPL_13290_0049 | tyrosyl-tRNA synthetase (EC:6.1.1.1); K01866 tyrosyl-tRNA synthetase [EC:6.1.1.1]                                        |
| GPL_13290_0048 | flap endonuclease-1; K04799 flap endonuclease-1 [EC:3.-.-.-]                                                             |
| GPL_13290_0045 | prolyl-tRNA synthetase (EC:6.1.1.15); K01881 prolyl-tRNA synthetase [EC:6.1.1.15]                                        |
| GPL_13290_0044 | diaminopimelate aminotransferase; K01439 succinyl-diaminopimelate desuccinylase [EC:3.5.1.18]                            |
| GPL_13290_0041 | aspartate aminotransferase (EC:2.6.1.1); K00812 aspartate aminotransferase [EC:2.6.1.1]                                  |
| GPL_13290_0040 | transcriptional regulator                                                                                                |
| GPL_13290_0034 | protein of unknown function DUF255; K06888                                                                               |
| GPL_13290_0031 | 4-hydroxyphenylpyruvate dioxygenase (EC:1.13.11.27); K00457 4-hydroxyphenylpyruvate dioxygenase [EC:1.13.11.27]          |
| GPL_13290_0030 | fumarylacetoacetate hydrolase family protein                                                                             |
| GPL_13290_0029 | homogentisate 1,2-dioxygenase (EC:1.13.11.5); K00451 homogentisate 1,2-dioxygenase [EC:1.13.11.5]                        |



|                |                                                                                                                                                                     |
|----------------|---------------------------------------------------------------------------------------------------------------------------------------------------------------------|
| GPL_13290_0027 | DNA-binding protein; K06934                                                                                                                                         |
| GPL_13290_0024 | TenA/THI-4 family protein                                                                                                                                           |
| GPL_13290_0021 | 2-hydroxyhepta-2,4-diene-1,7-dioate isomerase                                                                                                                       |
| GPL_13290_0018 | hypothetical protein; K09732 hypothetical protein                                                                                                                   |
| GPL_13290_0017 | molybdopterin binding domain-containing protein; K03742 competence/damage-inducible protein CinA                                                                    |
| GPL_13290_0015 | isomerizing glucosamine--fructose-6-phosphate aminotransferase (EC:2.6.1.16); K00820 glucosamine--fructose-6-phosphate aminotransferase (isomerizing) [EC:2.6.1.16] |
| GPL_13290_0010 | hypothetical protein                                                                                                                                                |
| GPL_13290_0007 | DNA helicase II; K03657 DNA helicase II / ATP-dependent DNA helicase PcrA [EC:3.6.1.-]                                                                              |
| GPL_13290_0006 | putative alcohol dehydrogenase; K00001 alcohol dehydrogenase [EC:1.1.1.1]                                                                                           |
| GPL_13287_0180 | hypothetical protein                                                                                                                                                |
| GPL_13287_0178 | hypothetical protein                                                                                                                                                |
| GPL_13287_0176 | diphosphomevalonate decarboxylase (EC:4.1.1.33); K01597 diphosphomevalonate decarboxylase [EC:4.1.1.33]                                                             |
| GPL_13287_0175 | hypothetical protein                                                                                                                                                |
| GPL_13287_0173 | single-stranded DNA-binding protein; K07466 replication factor A1                                                                                                   |
| GPL_13287_0172 | ATP-dependent DNA ligase (EC:6.5.1.1); K10747 DNA ligase 1 [EC:6.5.1.1]                                                                                             |
| GPL_13287_0168 | sdhA; succinate dehydrogenase flavoprotein subunit (EC:1.3.5.1); K00239 succinate dehydrogenase flavoprotein subunit [EC:1.3.99.1]                                  |
| GPL_13287_0167 | fumarate reductase iron-sulfur subunit (EC:1.3.5.1); K00240 succinate dehydrogenase iron-sulfur protein [EC:1.3.99.1]                                               |
| GPL_13287_0159 | pyruvate dehydrogenase (EC:1.2.2.2); K00156 pyruvate dehydrogenase (cytochrome) [EC:1.2.2.2]                                                                        |
| GPL_13287_0157 | phosphoribosylaminoimidazole carboxylase catalytic subunit; K01588 5-(carboxyamino)imidazole ribonucleotide mutase [EC:5.4.99.18]                                   |
| GPL_13287_0152 | tricorn protease interacting factor F2 (EC:3.4.11.-); K13722 tricorn protease interacting factor F2/3 [EC:3.4.11.-]                                                 |
| GPL_13287_0151 | PmbA protein; K03592 PmbA protein                                                                                                                                   |
| GPL_13287_0150 | zinc metalloprotease (EC:3.4.24.-); K03568 TldD protein                                                                                                             |
| GPL_13287_0149 | CBS domain-containing protein                                                                                                                                       |
| GPL_13287_0148 | glycine hydroxymethyltransferase related protein; K00600 glycine hydroxymethyltransferase [EC:2.1.2.1]                                                              |
| GPL_13287_0146 | DNA polymerase II (EC:2.7.7.7); K02319 DNA polymerase I [EC:2.7.7.7]                                                                                                |
| GPL_13287_0139 | hypothetical protein                                                                                                                                                |
| GPL_13287_0137 | Fe <sup>2+</sup> uptake regulation protein; K03711 Fur family transcriptional regulator, ferric uptake regulator                                                    |
| GPL_13287_0136 | hisS; histidyl-tRNA synthetase (EC:6.1.1.21); K01892 histidyl-tRNA synthetase [EC:6.1.1.21]                                                                         |
| GPL_13287_0134 | transcription regulator                                                                                                                                             |

|                |                                                                                                                                                                                                                          |
|----------------|--------------------------------------------------------------------------------------------------------------------------------------------------------------------------------------------------------------------------|
| GPL_13287_0132 | GMP synthase subunit B (EC:6.3.5.2); K01951 GMP synthase (glutamine-hydrolysing) [EC:6.3.5.2]                                                                                                                            |
| GPL_13287_0131 | rps2P; 30S ribosomal protein S2; K02967 small subunit ribosomal protein S2                                                                                                                                               |
| GPL_13287_0128 | aspartate aminotransferase related protein                                                                                                                                                                               |
| GPL_13287_0124 | transcription factor; K03120 transcription initiation factor TFIID TATA-box-binding protein                                                                                                                              |
| GPL_13287_0119 | inosine 5'-monophosphate dehydrogenase (EC:1.1.1.205); K00088 IMP dehydrogenase [EC:1.1.1.205]                                                                                                                           |
| GPL_13287_0116 | pyruvate phosphate dikinase (EC:2.7.9.1); K01006 pyruvate,orthophosphate dikinase [EC:2.7.9.1]                                                                                                                           |
| GPL_13287_0115 | alpha/beta superfamily hydrolase                                                                                                                                                                                         |
| GPL_13287_0113 | bifunctional phosphopantothenoylcysteine decarboxylase/phosphopantothenate synthase (EC:4.1.1.36 6.3.2.5); K13038 phosphopantothenoylcysteine decarboxylase / phosphopantothenate--cysteine ligase [EC:4.1.1.36 6.3.2.5] |
| GPL_13287_0108 | transcriptional regulator                                                                                                                                                                                                |
| GPL_13287_0107 | probable endonuclease IV (EC:3.1.21.2); K01151 deoxyribonuclease IV [EC:3.1.21.2]                                                                                                                                        |
| GPL_13287_0102 | hypothetical protein; K07062                                                                                                                                                                                             |
| GPL_13287_0099 | alpha-mannosidase; K01191 alpha-mannosidase [EC:3.2.1.24]                                                                                                                                                                |
| GPL_13287_0098 | methyltransferase                                                                                                                                                                                                        |
| GPL_13287_0097 | protein of unknown function DUF323                                                                                                                                                                                       |
| GPL_13287_0091 | acetylornithine aminotransferase (EC:2.6.1.11); K05830 acetylornithine/acetyl-lysine aminotransferase [EC:2.6.1.11 2.6.1.-]                                                                                              |
| GPL_13287_0087 | hypothetical protein                                                                                                                                                                                                     |
| GPL_13287_0080 | beta-hydroxybutyryl-CoA dehydrogenase related protein; K00074 3-hydroxybutyryl-CoA dehydrogenase [EC:1.1.1.157]                                                                                                          |
| GPL_13287_0078 | aspC; aspartyl-tRNA synthetase (EC:6.1.1.12); K01876 aspartyl-tRNA synthetase [EC:6.1.1.12]                                                                                                                              |
| GPL_13287_0076 | glucokinase (EC:2.7.1.2); K00845 glucokinase [EC:2.7.1.2]                                                                                                                                                                |
| GPL_13287_0071 | gyrB; DNA gyrase subunit B; K02470 DNA gyrase subunit B [EC:5.99.1.3]                                                                                                                                                    |
| GPL_13287_0070 | DNA gyrase subunit A; K02469 DNA gyrase subunit A [EC:5.99.1.3]                                                                                                                                                          |
| GPL_13287_0069 | homoserine dehydrogenase (EC:1.1.1.3); K00003 homoserine dehydrogenase [EC:1.1.1.3]                                                                                                                                      |
| GPL_13287_0067 | 4-hydroxybenzoate decarboxylase; K03182 3-octaprenyl-4-hydroxybenzoate carboxy-lyase UbiD [EC:4.1.1.-]                                                                                                                   |
| GPL_13287_0060 | putative nitrite reductase/sulfite reductase                                                                                                                                                                             |
| GPL_13287_0057 | hypothetical protein                                                                                                                                                                                                     |
| GPL_13287_0054 | tyrosine recombinase XerD; K04763 integrase/recombinase XerD                                                                                                                                                             |
| GPL_13287_0050 | Putative uncharacterized protein                                                                                                                                                                                         |
| GPL_13287_0040 | hypothetical protein                                                                                                                                                                                                     |
| GPL_13287_0036 | NAD-dependent aldehyde dehydrogenase; K00128 aldehyde dehydrogenase (NAD+) [EC:1.2.1.3]                                                                                                                                  |

|                |                                                                                                                                                            |
|----------------|------------------------------------------------------------------------------------------------------------------------------------------------------------|
| GPL_13287_0035 | hypothetical protein                                                                                                                                       |
| GPL_13287_0034 | arsenite-transporting ATPase (EC:3.6.3.16); K01551 arsenite-transporting ATPase [EC:3.6.3.16]                                                              |
| GPL_13287_0032 | DNA/RNA-binding protein Alba; K03622 archaea-specific DNA-binding protein                                                                                  |
| GPL_13287_0030 | hypothetical protein                                                                                                                                       |
| GPL_13287_0028 | isovaleryl-CoA dehydrogenase; K00253 isovaleryl-CoA dehydrogenase [EC:1.3.99.10]                                                                           |
| GPL_13287_0026 | arginine deiminase                                                                                                                                         |
| GPL_13287_0025 | bifunctional phosphoglucose/phosphomannose isomerase; K01809 mannose-6-phosphate isomerase [EC:5.3.1.8]; K01810 glucose-6-phosphate isomerase [EC:5.3.1.9] |
| GPL_13287_0024 | hypothetical protein                                                                                                                                       |
| GPL_13287_0022 | UDP-glucose 4-epimerase                                                                                                                                    |
| GPL_13287_0020 | iron-regulated ABC transporter ATPase subunit; K09013 Fe-S cluster assembly ATP-binding protein                                                            |
| GPL_13287_0018 | hypothetical protein; K07033                                                                                                                               |
| GPL_13287_0017 | csd1; cysteine desulfurase (EC:4.4.1.-); K11717 cysteine desulfurase / selenocysteine lyase [EC:2.8.1.7 4.4.1.16]                                          |
| GPL_13287_0013 | ATPase; K06915                                                                                                                                             |
| GPL_13287_0011 | N-acyl-L-amino acid amidohydrolase (EC:3.5.1.14); K01436 aminoacylase [EC:3.5.1.14]                                                                        |
| GPL_12824_0011 | hypothetical protein                                                                                                                                       |
| GPL_12303_0037 | X-Pro dipeptidase                                                                                                                                          |
| GPL_12303_0031 | hypothetical protein                                                                                                                                       |
| GPL_12303_0026 | nadE; NAD synthetase (EC:6.3.1.5); K01916 NAD+ synthase [EC:6.3.1.5]                                                                                       |
| GPL_12303_0025 | bifunctional protein FcID; K01491 methylenetetrahydrofolate dehydrogenase (NADP+) / methenyltetrahydrofolate cyclohydrolase [EC:1.5.1.5 3.5.4.9]           |
| GPL_12303_0024 | glucose-1-dehydrogenase (EC:1.1.1.47); K00034 glucose 1-dehydrogenase [EC:1.1.1.47]                                                                        |
| GPL_12303_0023 | ribA; GTP cyclohydrolase II (EC:3.5.4.25); K01497 GTP cyclohydrolase II [EC:3.5.4.25]                                                                      |
| GPL_12303_0022 | hypothetical protein                                                                                                                                       |
| GPL_12303_0020 | NADH-dependent oxidoreductase (EC:1.6.-.-); K00359 NADH oxidase [EC:1.6.-.-]                                                                               |
| GPL_12303_0016 | hypothetical protein; K01760 cystathionine beta-lyase [EC:4.4.1.8]                                                                                         |
| GPL_12303_0012 | acyl-CoA dehydrogenase related protein                                                                                                                     |
| GPL_12302_0044 | potassium-transporting ATPase subunit B (EC:3.6.3.12); K01547 K+-transporting ATPase ATPase B chain [EC:3.6.3.12]                                          |
| GPL_12302_0042 | hypothetical protein                                                                                                                                       |
| GPL_12302_0039 | dihydroorotate dehydrogenase 1B (EC:1.3.3.1); K00226 dihydroorotate oxidase [EC:1.3.3.1]                                                                   |
| GPL_12302_0034 | hypothetical protein                                                                                                                                       |

|                |                                                                                                                                                   |
|----------------|---------------------------------------------------------------------------------------------------------------------------------------------------|
| GPL_12302_0027 | pheS; phenylalanyl-tRNA synthetase subunit alpha (EC:6.1.1.20); K01889 phenylalanyl-tRNA synthetase alpha chain [EC:6.1.1.20]                     |
| GPL_12302_0022 | regulatory protein MoxR related protein; K03924 MoxR-like ATPase [EC:3.6.3.-]                                                                     |
| GPL_12302_0010 | proline dipeptidase related protein; K01271 X-Pro dipeptidase [EC:3.4.13.9]                                                                       |
| GPL_12302_0009 | gamma-glutamyltranspeptidase; K00681 gamma-glutamyltranspeptidase [EC:2.3.2.2]                                                                    |
| GPL_12302_0006 | 30S ribosomal protein S8e; K02995 small subunit ribosomal protein S8e                                                                             |
| GPL_12302_0002 | X-Pro dipeptidase                                                                                                                                 |
| GPL_12052_0012 | ATPase; K06921                                                                                                                                    |
| GPL_11753_0005 | site-specific DNA-methyltransferase (adenine-specific) (EC:2.1.1.72); K00571 site-specific DNA-methyltransferase (adenine-specific) [EC:2.1.1.72] |
| GPL_11753_0004 | type III restriction enzyme, res subunit family                                                                                                   |
| Fer2_97_0015   | isopentenyl pyrophosphate isomerase (EC:5.3.3.2); K01823 isopentenyl-diphosphate delta-isomerase [EC:5.3.3.2]                                     |
| Fer2_97_0013   | ABC transporter ATP-binding protein                                                                                                               |
| Fer2_97_0011   | DEXX-box atpase                                                                                                                                   |
| Fer2_97_0005   | atpA; V-type ATP synthase subunit A (EC:3.6.3.14); K02117 V-type H <sup>+</sup> -transporting ATPase subunit A [EC:3.6.3.14]                      |
| Fer2_97_0004   | V-type ATP synthase subunit B (EC:3.6.3.14); K02118 V-type H <sup>+</sup> -transporting ATPase subunit B [EC:3.6.3.14]                            |
| Fer2_93_0023   | D-3-phosphoglycerate dehydrogenase (EC:1.1.1.95); K00058 D-3-phosphoglycerate dehydrogenase [EC:1.1.1.95]                                         |
| Fer2_93_0019   | glutaredoxin related protein                                                                                                                      |
| Fer2_93_0017   | hypothetical protein                                                                                                                              |
| Fer2_93_0014   | putative protease La homolog type 2 (EC:3.4.21.-); K01362 [EC:3.4.21.-]                                                                           |
| Fer2_93_0013   | DNA primase (EC:2.7.7.-)                                                                                                                          |
| Fer2_93_0011   | endonuclease IV (EC:3.1.21.2); K01151 deoxyribonuclease IV [EC:3.1.21.2]                                                                          |
| Fer2_93_0008   | spermidine synthase (EC:2.5.1.16); K00797 spermidine synthase [EC:2.5.1.16]                                                                       |
| Fer2_93_0007   | DNA-binding protein                                                                                                                               |
| Fer2_93_0001   | translation initiation factor IF-2 subunit gamma; K03242 translation initiation factor eIF-2 gamma subunit                                        |
| Fer2_90_0009   | hypothetical protein                                                                                                                              |
| Fer2_90_0003   | acyl-CoA synthetase                                                                                                                               |
| Fer2_9_0076    | NAD-dependent aldehyde dehydrogenase; K00155 [EC:1.2.1.-]                                                                                         |
| Fer2_9_0075    | mannose-1-phosphate guanyltransferase related protein                                                                                             |
| Fer2_9_0062    | putative NTPase (EC:3.6.1.-); K06928                                                                                                              |
| Fer2_9_0052    | hypothetical protein                                                                                                                              |

|               |                                                                                                                              |
|---------------|------------------------------------------------------------------------------------------------------------------------------|
| Fer2_9_0048   | universal stress protein                                                                                                     |
| Fer2_9_0026   | hypothetical protein; K09700 hypothetical protein                                                                            |
| Fer2_9_0017   | thermosome beta chain                                                                                                        |
| Fer2_9_0016   | thermosome subunit                                                                                                           |
| Fer2_9_0006   | molybdenum cofactor biosynthesis protein A; K06937                                                                           |
| Fer2_89_0016  | FixC protein; K00313 electron transfer flavoprotein-quinone oxidoreductase [EC:1.5.5.-]                                      |
| Fer2_89_0015  | electron transfer flavoprotein alpha and beta-subunit                                                                        |
| Fer2_89_0013  | CBS domain-containing protein                                                                                                |
| Fer2_89_0012  | citrate synthase (EC:2.3.3.5); K01647 citrate synthase [EC:2.3.3.1]                                                          |
| Fer2_85_0017  | hypothetical protein                                                                                                         |
| Fer2_85_0008  | alanyl-tRNA synthetase (EC:6.1.1.7); K07050                                                                                  |
| Fer2_85_0006  | rpl10e; 50S ribosomal protein L10e; K02866 large subunit ribosomal protein L10e                                              |
| Fer2_85_0005  | putative arginase (EC:3.5.3.1); K01476 arginase [EC:3.5.3.1]                                                                 |
| Fer2_85_0004  | translation initiation factor IF-5A; K03263 translation initiation factor eIF-5A                                             |
| Fer2_83_0009  | putative transaldolase (EC:2.2.1.2); K00616 transaldolase [EC:2.2.1.2]                                                       |
| Fer2_83_0007  | cleavage and polyadenylation specificity factor, 100 kDa subunit; K07041                                                     |
| Fer2_83_0006  | proteasome beta subunit (EC:3.4.25.1); K03433 proteasome beta subunit [EC:3.4.25.1]                                          |
| Fer2_83_0002  | single-stranded DNA-binding protein; K07466 replication factor A1                                                            |
| Fer2_82_0023  | peroxiredoxin                                                                                                                |
| Fer2_82_0018  | hypothetical protein                                                                                                         |
| Fer2_82_0017  | 3-hydroxy-3-methylglutaryl-coenzyme A reductase (EC:1.1.1.34); K00021 3-hydroxy-3-methylglutaryl-CoA reductase [EC:1.1.1.34] |
| Fer2_72_0006  | dihydroorotate dehydrogenase (EC:1.3.3.1); K00226 dihydroorotate oxidase [EC:1.3.3.1]                                        |
| Fer2_70_0013  | fumarylacetoacetase (EC:3.7.1.2)                                                                                             |
| Fer2_70_0011  | TenA/THI-4 family protein                                                                                                    |
| Fer2_671_0002 | hypothetical protein                                                                                                         |
| Fer2_64_0022  | hypothetical protein                                                                                                         |
| Fer2_64_0015  | 3-hydroxyacyl-CoA dehydrogenase (EC:1.1.1.35); K00074 3-hydroxybutyryl-CoA dehydrogenase [EC:1.1.1.157]                      |
| Fer2_64_0010  | oxidoreductase (EC:1.-.-.-); K00540 [EC:1.-.-.-]                                                                             |
| Fer2_64_0005  | carbon monoxide dehydrogenase beta subunit (EC:1.2.99.2); K03520 carbon-monoxide dehydrogenase large subunit [EC:1.2.99.2]   |
| Fer2_60_0035  | spermidine synthase (EC:2.5.1.16); K00797 spermidine synthase [EC:2.5.1.16]                                                  |

|               |                                                                                                             |
|---------------|-------------------------------------------------------------------------------------------------------------|
| Fer2_60_0034  | DNA-binding protein                                                                                         |
| Fer2_60_0030  | translation initiation factor IF-2 subunit gamma; K03242 translation initiation factor eIF-2 gamma subunit  |
| Fer2_60_0027  | hypothetical protein                                                                                        |
| Fer2_60_0009  | rpl3p; 50S ribosomal protein L3P; K02906 large subunit ribosomal protein L3                                 |
| Fer2_60_0008  | rpl4lp; 50S ribosomal protein L4P; K02930 large subunit ribosomal protein L4e                               |
| Fer2_60_0005  | rps19p; 30S ribosomal protein S19P; K02965 small subunit ribosomal protein S19                              |
| Fer2_60_0004  | rpl22p; 50S ribosomal protein L22P; K02890 large subunit ribosomal protein L22                              |
| Fer2_60_0003  | rps3p; 30S ribosomal protein S3P; K02982 small subunit ribosomal protein S3                                 |
| Fer2_584_0004 | oxidoreductase (EC:1.-.-)                                                                                   |
| Fer2_56_0028  | DNA polymerase beta subunit; K07076                                                                         |
| Fer2_56_0012  | hsp 20 family small heat shock protein                                                                      |
| Fer2_56_0011  | ubiquione biosynthesis protein                                                                              |
| Fer2_56_0009  | zinc-binding alcohol dehydrogenase (EC:1.1.1.1); K00001 alcohol dehydrogenase [EC:1.1.1.1]                  |
| Fer2_56_0005  | integrase/recombinase; K04763 integrase/recombinase XerD                                                    |
| Fer2_55_0031  | CBS domain-containing protein                                                                               |
| Fer2_55_0029  | putative S1 family peptidase                                                                                |
| Fer2_55_0009  | glycosyltransferase (EC:2.4.-.-); K00786 [EC:2.4.-.-]                                                       |
| Fer2_50_0012  | ATP-dependent protease Lon                                                                                  |
| Fer2_50_0011  | eno; phosphopyruvate hydratase (EC:4.2.1.11); K01689 enolase [EC:4.2.1.11]                                  |
| Fer2_5_0090   | Xaa-Pro dipeptidase (EC:3.4.13.9); K01271 X-Pro dipeptidase [EC:3.4.13.9]                                   |
| Fer2_5_0078   | ABC transporter extracellular solute-binding protein                                                        |
| Fer2_5_0074   | tfb; transcription initiation factor IIB; K03124 transcription initiation factor TFIIB                      |
| Fer2_5_0072   | tfb; transcription initiation factor IIB; K03124 transcription initiation factor TFIIB                      |
| Fer2_5_0065   | 30S ribosomal protein S3Ae; K02984 small subunit ribosomal protein S3Ae                                     |
| Fer2_5_0059   | glutamate dehydrogenase (EC:1.4.1.3); K00261 glutamate dehydrogenase (NAD(P)+) [EC:1.4.1.3]                 |
| Fer2_5_0056   | DNA polymerase sliding clamp; K04802 proliferating cell nuclear antigen                                     |
| Fer2_5_0043   | hypothetical protein                                                                                        |
| Fer2_5_0035   | glycine dehydrogenase subunit 2 (EC:1.4.4.2); K00283 glycine dehydrogenase subunit 2 [EC:1.4.4.2]           |
| Fer2_5_0034   | replication factor A; K07466 replication factor A1                                                          |
| Fer2_5_0020   | phosphoribosylamine--glycine ligase (EC:6.3.4.13); K01945 phosphoribosylamine--glycine ligase [EC:6.3.4.13] |
| Fer2_5_0011   | formate dehydrogenase subunit alpha; K00123 formate dehydrogenase, alpha subunit [EC:1.2.1.2]               |
| Fer2_491_0007 | amidohydrolase                                                                                              |

|               |                                                                                                                        |
|---------------|------------------------------------------------------------------------------------------------------------------------|
| Fer2_47_0030  | anthranilate synthase component I (EC:4.1.3.27); K01657 anthranilate synthase component I [EC:4.1.3.27]                |
| Fer2_47_0024  | ribosomal protein                                                                                                      |
| Fer2_47_0020  | hypothetical protein                                                                                                   |
| Fer2_47_0004  | hypothetical protein; K06875                                                                                           |
| Fer2_47_0003  | 30S ribosomal protein S19e; K02966 small subunit ribosomal protein S19e                                                |
| Fer2_40_0044  | 30S ribosomal protein S7P                                                                                              |
| Fer2_40_0036  | aspC; aspartyl-tRNA synthetase (EC:6.1.1.12); K01876 aspartyl-tRNA synthetase [EC:6.1.1.12]                            |
| Fer2_39_0046  | aspartate aminotransferase (EC:2.6.1.1); K00812 aspartate aminotransferase [EC:2.6.1.1]                                |
| Fer2_39_0038  | pantothenate kinase; K00867 type I pantothenate kinase [EC:2.7.1.33]                                                   |
| Fer2_39_0029  | oxidoreductase                                                                                                         |
| Fer2_39_0028  | transposase IS4 family protein                                                                                         |
| Fer2_39_0014  | thioredoxin; K03671 thioredoxin 1                                                                                      |
| Fer2_39_0004  | transporter                                                                                                            |
| Fer2_39_0003  | hypothetical protein                                                                                                   |
| Fer2_38_0042  | transcriptional regulator                                                                                              |
| Fer2_38_0041  | alkyl hydroperoxide reductase subunit C; K03386 peroxiredoxin (alkyl hydroperoxide reductase subunit C) [EC:1.11.1.15] |
| Fer2_38_0039  | hypothetical protein                                                                                                   |
| Fer2_38_0027  | acetyl-CoA acetyltransferase (EC:2.3.1.9); K00626 acetyl-CoA C-acetyltransferase [EC:2.3.1.9]                          |
| Fer2_38_0024  | dihydroxy-acid dehydratase; K01687 dihydroxy-acid dehydratase [EC:4.2.1.9]                                             |
| Fer2_38_0023  | dihydroxy-acid dehydratase; K01687 dihydroxy-acid dehydratase [EC:4.2.1.9]                                             |
| Fer2_38_0021  | acetolactate synthase catalytic subunit (EC:2.2.1.6); K01652 acetolactate synthase I/II/III large subunit [EC:2.2.1.6] |
| Fer2_38_0019  | ketol-acid reductoisomerase (EC:1.1.1.86); K00053 ketol-acid reductoisomerase [EC:1.1.1.86]                            |
| Fer2_37_0037  | hypothetical protein                                                                                                   |
| Fer2_37_0033  | hypothetical protein                                                                                                   |
| Fer2_37_0005  | hypothetical protein                                                                                                   |
| Fer2_36_0046  | S-adenosylmethionine synthetase (EC:2.5.1.6); K00789 S-adenosylmethionine synthetase [EC:2.5.1.6]                      |
| Fer2_36_0038  | acetyl-coenzyme A synthetase (EC:6.2.1.1); K01895 acetyl-CoA synthetase [EC:6.2.1.1]                                   |
| Fer2_36_0036  | cytochrome P450 (EC:1.14.14.1); K00493 unspecific monooxygenase [EC:1.14.14.1]                                         |
| Fer2_36_0021  | mRNA 3'-end processing factor; K07577 putative mRNA 3'-end processing factor                                           |
| Fer2_310_0008 | hypothetical protein                                                                                                   |
| Fer2_31_0045  | xanthine-guanine phosphoribosyltransferase (EC:2.4.2.22); K00769 xanthine phosphoribosyltransferase                    |

|               |                                                                                                                                                         |
|---------------|---------------------------------------------------------------------------------------------------------------------------------------------------------|
|               | [EC:2.4.2.22]                                                                                                                                           |
| Fer2_31_0042  | FAD dependent oxidoreductase; K00313 electron transfer flavoprotein-quinone oxidoreductase [EC:1.5.5.-]                                                 |
| Fer2_31_0032  | ef1a, tuf; elongation factor 1-alpha (EC:3.6.5.3); K03231 elongation factor EF-1 alpha subunit [EC:3.6.5.3]                                             |
| Fer2_31_0030  | fusA; elongation factor EF-2; K03234 elongation factor EF-2 [EC:3.6.5.3]                                                                                |
| Fer2_31_0019  | aspA; aspartate ammonia-lyase (EC:4.3.1.1); K01679 fumarate hydratase, class II [EC:4.2.1.2]                                                            |
| Fer2_31_0018  | AsnC family transcriptional regulator                                                                                                                   |
| Fer2_31_0015  | thioredoxin reductase (EC:1.8.1.9); K00384 thioredoxin reductase (NADPH) [EC:1.8.1.9]                                                                   |
| Fer2_31_0008  | 50S ribosomal protein L1P                                                                                                                               |
| Fer2_31_0007  | rplP0; acidic ribosomal protein P0; K02864 large subunit ribosomal protein L10                                                                          |
| Fer2_31_0006  | rpl12p; 50S ribosomal protein L12P; K02869 large subunit ribosomal protein L12                                                                          |
| Fer2_31_0004  | peroxiredoxin; K03564 peroxiredoxin Q/BCP [EC:1.11.1.15]                                                                                                |
| Fer2_307_0007 | hypothetical protein; K01126 glycerophosphoryl diester phosphodiesterase [EC:3.1.4.46]                                                                  |
| Fer2_307_0004 | transposase IS4 family protein                                                                                                                          |
| Fer2_29_0049  | DNA/RNA-binding protein AlbA; K03622 archaea-specific DNA-binding protein                                                                               |
| Fer2_29_0044  | rps4p; 30S ribosomal protein S4P; K02986 small subunit ribosomal protein S4                                                                             |
| Fer2_29_0043  | rps11p; 30S ribosomal protein S11P; K02948 small subunit ribosomal protein S11                                                                          |
| Fer2_29_0032  | methionine synthase (EC:2.1.1.14); K00549 5-methyltetrahydropteroyltriglutamate--homocysteine methyltransferase [EC:2.1.1.14]                           |
| Fer2_29_0031  | hypothetical protein; K00549 5-methyltetrahydropteroyltriglutamate--homocysteine methyltransferase [EC:2.1.1.14]                                        |
| Fer2_29_0024  | transposase IS4 family protein                                                                                                                          |
| Fer2_29_0023  | multitransmembrane protein                                                                                                                              |
| Fer2_29_0011  | hypothetical protein                                                                                                                                    |
| Fer2_247_0008 | 2-hydroxyacid dehydrogenase                                                                                                                             |
| Fer2_247_0006 | sterol carrier protein                                                                                                                                  |
| Fer2_24_0050  | glutamine synthetase; K01915 glutamine synthetase [EC:6.3.1.2]                                                                                          |
| Fer2_24_0045  | ferredoxin                                                                                                                                              |
| Fer2_24_0042  | DNA-binding protein                                                                                                                                     |
| Fer2_24_0040  | putative peroxiredoxin (EC:1.11.1.15); K03386 peroxiredoxin (alkyl hydroperoxide reductase subunit C) [EC:1.11.1.15]                                    |
| Fer2_24_0024  | peptidyl-prolyl cis-trans isomerase (EC:5.2.1.8); K01802 peptidylprolyl isomerase [EC:5.2.1.8]                                                          |
| Fer2_205_0009 | 3-isopropylmalate dehydratase large subunit (EC:4.2.1.33); K01703 3-isopropylmalate/(R)-2-methylmalate dehydratase large subunit [EC:4.2.1.33 4.2.1.35] |



|               |                                                                                                                                    |
|---------------|------------------------------------------------------------------------------------------------------------------------------------|
| Fer2_205_0006 | sulfide-quinone oxidoreductase (EC:1.8.5.-); K05908 [EC:1.8.5.-]                                                                   |
| Fer2_205_0005 | hypothetical protein                                                                                                               |
| Fer2_205_0004 | hypothetical protein                                                                                                               |
| Fer2_205_0002 | transposase IS4 family protein                                                                                                     |
| Fer2_20_0042  | N-methylhydantoinase (EC:3.5.2.14); K01473 N-methylhydantoinase A [EC:3.5.2.14]                                                    |
| Fer2_20_0041  | hydantoinase_b/oxoprolinase (EC:3.5.2.9); K01474 N-methylhydantoinase B [EC:3.5.2.14]                                              |
| Fer2_20_0036  | putative RNA-associated protein; K07582 hypothetical protein                                                                       |
| Fer2_20_0035  | exosome complex RNA-binding protein Rrp4; K03679 exosome complex component RRP4                                                    |
| Fer2_20_0034  | exosome complex exonuclease Rrp41 (EC:2.7.7.56); K11600 exosome complex component RRP41                                            |
| Fer2_20_0033  | exosome complex RNA-binding protein Rrp42 (EC:2.7.7.56); K12589 exosome complex component RRP42                                    |
| Fer2_20_0028  | hypothetical protein; K07572 putative nucleotide binding protein                                                                   |
| Fer2_20_0026  | band 7 integral membrane protein-like protein                                                                                      |
| Fer2_20_0024  | acetyl-CoA acetyltransferase (EC:2.3.1.9); K00626 acetyl-CoA C-acetyltransferase [EC:2.3.1.9]                                      |
| Fer2_20_0022  | hypothetical protein; K07083                                                                                                       |
| Fer2_20_0013  | hypothetical protein                                                                                                               |
| Fer2_20_0006  | 4-aminobutyrate aminotransferase (EC:2.6.1.19); K00823 4-aminobutyrate aminotransferase [EC:2.6.1.19]                              |
| Fer2_20_0005  | membrane associated serine protease                                                                                                |
| Fer2_19_0069  | hypothetical protein                                                                                                               |
| Fer2_19_0045  | pyridoxal biosynthesis lyase PdxS; K06215 pyridoxine biosynthesis protein [EC:4.-.-.]                                              |
| Fer2_19_0044  | malate dehydrogenase (EC:1.1.1.37); K00024 malate dehydrogenase [EC:1.1.1.37]                                                      |
| Fer2_19_0043  | sdhA; succinate dehydrogenase flavoprotein subunit (EC:1.3.5.1); K00239 succinate dehydrogenase flavoprotein subunit [EC:1.3.99.1] |
| Fer2_19_0042  | succinate dehydrogenase iron-sulfur subunit (EC:1.3.99.1); K00240 succinate dehydrogenase iron-sulfur protein [EC:1.3.99.1]        |
| Fer2_19_0040  | succinate dehydrogenase, subunit D (EC:1.3.99.1)                                                                                   |
| Fer2_19_0038  | 2-oxoglutarate synthase, alpha chain (EC:1.2.7.3); K00174 2-oxoglutarate ferredoxin oxidoreductase subunit alpha [EC:1.2.7.3]      |
| Fer2_19_0036  | succinyl-CoA synthetase subunit alpha (EC:6.2.1.5); K01902 succinyl-CoA synthetase alpha subunit [EC:6.2.1.5]                      |
| Fer2_19_0035  | sucC; succinyl-CoA synthetase subunit beta (EC:6.2.1.5); K01903 succinyl-CoA synthetase beta subunit [EC:6.2.1.5]                  |
| Fer2_19_0023  | aconitate hydratase (EC:4.2.1.3); K01681 aconitate hydratase 1 [EC:4.2.1.3]                                                        |
| Fer2_19_0022  | acetyltransferase                                                                                                                  |
| Fer2_19_0021  | malate oxidoreductase (malic enzyme); K00027 malate dehydrogenase (oxaloacetate-decarboxylating)                                   |

|               |                                                                                                                                                              |
|---------------|--------------------------------------------------------------------------------------------------------------------------------------------------------------|
|               | [EC:1.1.1.38]                                                                                                                                                |
| Fer2_19_0016  | DNA gyrase subunit A (EC:5.99.1.3); K02469 DNA gyrase subunit A [EC:5.99.1.3]                                                                                |
| Fer2_19_0015  | gyrB; DNA gyrase subunit B (EC:5.99.1.3); K02470 DNA gyrase subunit B [EC:5.99.1.3]                                                                          |
| Fer2_18_0018  | geranylgeranyl hydrogenase                                                                                                                                   |
| Fer2_18_0015  | gamma-aminobutyraldehyde dehydrogenase (EC:1.2.1.8); K00130 betaine-aldehyde dehydrogenase [EC:1.2.1.8]                                                      |
| Fer2_18_0014  | gamma-aminobutyraldehyde dehydrogenase; K00130 betaine-aldehyde dehydrogenase [EC:1.2.1.8]                                                                   |
| Fer2_18_0013  | 1,3-propanediol dehydrogenase                                                                                                                                |
| Fer2_18_0012  | inorganic pyrophosphatase; K01507 inorganic pyrophosphatase [EC:3.6.1.1]                                                                                     |
| Fer2_18_0005  | threonine synthase (EC:4.2.3.1); K01733 threonine synthase [EC:4.2.3.1]                                                                                      |
| Fer2_177_0005 | tricorn protease interacting factor F3 (EC:3.4.11.-); K01269 aminopeptidase [EC:3.4.11.-]                                                                    |
| Fer2_17_0066  | hypothetical protein                                                                                                                                         |
| Fer2_17_0054  | hypothetical protein                                                                                                                                         |
| Fer2_17_0026  | thiamine pyrophosphate-dependent dehydrogenase, E1 component beta subunit (EC:1.2.4.1); K00162 pyruvate dehydrogenase E1 component subunit beta [EC:1.2.4.1] |
| Fer2_17_0021  | isocitrate dehydrogenase (EC:1.1.1.41); K00031 isocitrate dehydrogenase [EC:1.1.1.42]                                                                        |
| Fer2_166_0006 | hypothetical protein                                                                                                                                         |
| Fer2_163_0009 | hypothetical protein; K07484 transposase                                                                                                                     |
| Fer2_163_0007 | protoporphyrin IX magnesium chelatase related protein; K03404 magnesium chelatase subunit D [EC:6.6.1.1]                                                     |
| Fer2_163_0005 | rpl7ae; 50S ribosomal protein L7Ae; K02936 large subunit ribosomal protein L7Ae                                                                              |
| Fer2_163_0004 | rps28e; 30S ribosomal protein S28e; K02979 small subunit ribosomal protein S28e                                                                              |
| Fer2_154_0009 | sterol binding protein                                                                                                                                       |
| Fer2_15_0070  | alanyl-tRNA synthetase                                                                                                                                       |
| Fer2_15_0066  | 50S ribosomal protein L10e                                                                                                                                   |
| Fer2_15_0064  | translation initiation factor IF-5A; K03263 translation initiation factor eIF-5A                                                                             |
| Fer2_15_0047  | putative deoxyhypusine synthase (EC:2.5.1.46); K00809 deoxyhypusine synthase [EC:2.5.1.46]                                                                   |
| Fer2_15_0044  | translation initiation factor IF-2B subunit alpha                                                                                                            |
| Fer2_15_0042  | DNA-directed RNA polymerase subunit B (EC:2.7.7.6); K13798 DNA-directed RNA polymerase subunit B [EC:2.7.7.6]                                                |
| Fer2_15_0041  | DNA-directed RNA polymerase subunit A' (EC:2.7.7.6); K03041 DNA-directed RNA polymerase subunit A' [EC:2.7.7.6]                                              |
| Fer2_15_0040  | DNA-directed RNA polymerase subunit A'' (EC:2.7.7.6); K03042 DNA-directed RNA polymerase subunit A'' [EC:2.7.7.6]                                            |
| Fer2_15_0032  | glutamate-1-semialdehyde aminotransferase (EC:5.4.3.8); K01845 glutamate-1-semialdehyde 2,1-aminomutase                                                      |

|               |                                                                                                                                     |
|---------------|-------------------------------------------------------------------------------------------------------------------------------------|
|               | [EC:5.4.3.8]                                                                                                                        |
| Fer2_15_0025  | small nuclear ribonucleoprotein; K04796 small nuclear ribonucleoprotein                                                             |
| Fer2_15_0016  | rpl30p; 50S ribosomal protein L30P; K02907 large subunit ribosomal protein L30                                                      |
| Fer2_15_0015  | rps5p; 30S ribosomal protein S5P; K02988 small subunit ribosomal protein S5                                                         |
| Fer2_15_0013  | rpl19e; 50S ribosomal protein L19e; K02885 large subunit ribosomal protein L19e                                                     |
| Fer2_15_0011  | rpl6p; 50S ribosomal protein L6P; K02933 large subunit ribosomal protein L6                                                         |
| Fer2_15_0010  | rps8p; 30S ribosomal protein S8P; K02994 small subunit ribosomal protein S8                                                         |
| Fer2_15_0008  | 30S ribosomal protein S4e; K02987 small subunit ribosomal protein S4e                                                               |
| Fer2_15_0007  | rpl24p; 50S ribosomal protein L24P; K02895 large subunit ribosomal protein L24                                                      |
| Fer2_15_0006  | rpl14p; 50S ribosomal protein L14P; K02874 large subunit ribosomal protein L14                                                      |
| Fer2_15_0001  | rps3p; 30S ribosomal protein S3P; K02982 small subunit ribosomal protein S3                                                         |
| Fer2_138_0013 | urocanate hydratase (EC:4.2.1.49); K01712 urocanate hydratase [EC:4.2.1.49]                                                         |
| Fer2_12_0058  | sugar ABC transporter 1, ATP binding protein; K02023 multiple sugar transport system ATP-binding protein                            |
| Fer2_12_0054  | sugar ABC transporter 1, extracellular binding protein; K02027 multiple sugar transport system substrate-binding protein            |
| Fer2_12_0038  | hypothetical protein                                                                                                                |
| Fer2_12_0031  | proteasome subunit alpha (EC:3.4.25.1); K03432 proteasome alpha subunit [EC:3.4.25.1]                                               |
| Fer2_12_0018  | rps9p; 30S ribosomal protein S9P; K02996 small subunit ribosomal protein S9                                                         |
| Fer2_12_0017  | rpl13p; 50S ribosomal protein L13P; K02871 large subunit ribosomal protein L13                                                      |
| Fer2_12_0013  | peptidyl-prolyl cis-trans isomerase (EC:5.2.1.8); K01802 peptidylprolyl isomerase [EC:5.2.1.8]                                      |
| Fer2_12_0012  | succinate-semialdehyde dehydrogenase [NADP+] (EC:1.2.1.16); K00135 succinate-semialdehyde dehydrogenase (NADP+) [EC:1.2.1.16]       |
| Fer2_118_0015 | ornithine carbamoyltransferase (EC:2.1.3.3); K00611 ornithine carbamoyltransferase [EC:2.1.3.3]                                     |
| Fer2_118_0014 | thioredoxin reductase (EC:1.8.1.9); K00384 thioredoxin reductase (NADPH) [EC:1.8.1.9]                                               |
| Fer2_118_0013 | thermosome subunit                                                                                                                  |
| Fer2_118_0011 | NADH-dependent oxidoreductase (EC:1.6.-.-); K00359 NADH oxidase [EC:1.6.-.-]                                                        |
| Fer2_118_0003 | hypothetical protein                                                                                                                |
| Fer2_11_0067  | permease                                                                                                                            |
| Fer2_11_0061  | pyruvate dehydrogenase E1 component beta subunit (EC:1.2.4.1); K00162 pyruvate dehydrogenase E1 component subunit beta [EC:1.2.4.1] |
| Fer2_11_0047  | rps2P; 30S ribosomal protein S2; K02967 small subunit ribosomal protein S2                                                          |
| Fer2_11_0044  | GntR family transcriptional regulator (EC:2.6.1.-); K00837 [EC:2.6.1.-]                                                             |

|               |                                                                                                                                          |
|---------------|------------------------------------------------------------------------------------------------------------------------------------------|
| Fer2_11_0035  | transcription factor; K03120 transcription initiation factor TFIID TATA-box-binding protein                                              |
| Fer2_11_0032  | inosine 5'-monophosphate dehydrogenase (EC:1.1.1.205); K00088 IMP dehydrogenase [EC:1.1.1.205]                                           |
| Fer2_11_0013  | cell division cycle protein 48; K13525 transitional endoplasmic reticulum ATPase                                                         |
| Fer2_11_0009  | superoxide dismutase [Fe] (EC:1.15.1.1); K04564 superoxide dismutase, Fe-Mn family [EC:1.15.1.1]                                         |
| Fer2_11_0004  | gluconate/galactonate dehydratase (EC:4.2.1.39); K05308 gluconate dehydratase [EC:4.2.1.39]                                              |
| Fer2_107_0017 | Putative uncharacterized protein                                                                                                         |
| Fer2_107_0012 | glucose-1-dehydrogenase (EC:1.1.1.47); K00034 glucose 1-dehydrogenase [EC:1.1.1.47]                                                      |
| Fer2_104_0007 | CoA-transferase family III protein                                                                                                       |
| Fer2_103_0007 | ribonucleoside-diphosphate reductase, adenosylcobalamin-dependent; K00525 ribonucleoside-diphosphate reductase alpha chain [EC:1.17.4.1] |
| Fer2_103_0005 | electron transfer flavoprotein subunit beta                                                                                              |
| Fer2_10_0056  | carbon monoxide dehydrogenase beta subunit (EC:1.2.99.2); K03520 carbon-monoxide dehydrogenase large subunit [EC:1.2.99.2]               |
| Fer2_10_0054  | carbon monoxide dehydrogenase, medium chain (EC:1.2.99.2); K03519 carbon-monoxide dehydrogenase medium subunit [EC:1.2.99.2]             |
| Fer2_10_0039  | inosine-5'-monophosphate dehydrogenase (EC:1.1.1.205)                                                                                    |
| Fer2_10_0011  | thermopsin precursor (EC:3.4.23.42); K01385 thermopsin [EC:3.4.23.42]                                                                    |
| Fer2_1_0131   | 2-oxoacid ferredoxin oxidoreductase subunit beta (EC:1.2.7.1); K00175 2-oxoglutarate ferredoxin oxidoreductase subunit beta [EC:1.2.7.3] |
| Fer2_1_0130   | 2-oxoacid--ferredoxin oxidoreductase, alpha subunit                                                                                      |
| Fer2_1_0118   | tyrosyl-tRNA synthetase (EC:6.1.1.1); K01866 tyrosyl-tRNA synthetase [EC:6.1.1.1]                                                        |
| Fer2_1_0112   | radA; DNA repair and recombination protein RadA; K04483 DNA repair protein RadA                                                          |
| Fer2_1_0109   | hypothetical protein; K07496 putative transposase                                                                                        |
| Fer2_1_0106   | dnaK; molecular chaperone DnaK; K04043 molecular chaperone DnaK                                                                          |
| Fer2_1_0105   | GrpE protein; K03687 molecular chaperone GrpE                                                                                            |
| Fer2_1_0095   | gabT-1; 4-aminobutyrate aminotransferase (GabT-1) (EC:2.6.1.19); K00823 4-aminobutyrate aminotransferase [EC:2.6.1.19]                   |
| Fer2_1_0066   | acyl-CoA dehydrogenase, short-chain specific (EC:1.3.99.2); K00248 butyryl-CoA dehydrogenase [EC:1.3.99.2]                               |
| Fer2_1_0065   | acyl-CoA dehydrogenase (EC:1.3.99.-); K00249 acyl-CoA dehydrogenase [EC:1.3.99.3]                                                        |
| Fer2_1_0063   | long-chain-fatty-acid--CoA ligase (EC:2.3.1.86); K00666 fatty-acyl-CoA synthase [EC:6.2.1.-]                                             |
| Fer2_1_0062   | 3-hydroxybutyryl-CoA dehydrogenase/3-hydroxybutyryl-CoA dehydratase (EC:4.2.1.55 1.1.1.157)                                              |
| Fer2_1_0059   | RimK-like protein; K05827 lysine biosynthesis protein LysX                                                                               |
| Fer2_1_0030   | hypothetical protein                                                                                                                     |

|             |                                                                                                                                               |
|-------------|-----------------------------------------------------------------------------------------------------------------------------------------------|
| Fer1_1_1845 | glpK; glycerol kinase (EC:2.7.1.30); K00864 glycerol kinase [EC:2.7.1.30]                                                                     |
| Fer1_1_1837 | ISA0963-3 transposase                                                                                                                         |
| Fer1_1_1822 | asparagine synthetase A (EC:6.1.1.22); K01893 asparaginyl-tRNA synthetase [EC:6.1.1.22]                                                       |
| Fer1_1_1818 | CBS domain-containing protein                                                                                                                 |
| Fer1_1_1813 | threonine synthase                                                                                                                            |
| Fer1_1_1810 | cytochrome P450 (EC:1.14.14.1); K00493 unspecific monooxygenase [EC:1.14.14.1]                                                                |
| Fer1_1_1784 | 3-hydroxyacyl-CoA dehydrogenase                                                                                                               |
| Fer1_1_1769 | carbon monoxide dehydrogenase beta subunit                                                                                                    |
| Fer1_1_1765 | glucose 1-dehydrogenase, putative                                                                                                             |
| Fer1_1_1748 | putative DNA-binding protein; K06934                                                                                                          |
| Fer1_1_1745 | pyridoxal biosynthesis lyase PdxS; K06215 pyridoxine biosynthesis protein [EC:4.-.-.]                                                         |
| Fer1_1_1744 | malate dehydrogenase (EC:1.1.1.37); K00024 malate dehydrogenase [EC:1.1.1.37]                                                                 |
| Fer1_1_1743 | sdhA; succinate dehydrogenase flavoprotein subunit (EC:1.3.5.1); K00239 succinate dehydrogenase flavoprotein subunit [EC:1.3.99.1]            |
| Fer1_1_1742 | succinate dehydrogenase iron-sulfur subunit (EC:1.3.99.1); K00240 succinate dehydrogenase iron-sulfur protein [EC:1.3.99.1]                   |
| Fer1_1_1739 | 2-oxoglutarate ferredoxin oxidoreductase subunit beta (EC:1.2.7.3); K00175 2-oxoglutarate ferredoxin oxidoreductase subunit beta [EC:1.2.7.3] |
| Fer1_1_1738 | 2-oxoglutarate synthase, alpha chain (EC:1.2.7.3); K00174 2-oxoglutarate ferredoxin oxidoreductase subunit alpha [EC:1.2.7.3]                 |
| Fer1_1_1736 | succinyl-CoA synthetase subunit alpha (EC:6.2.1.5); K01902 succinyl-CoA synthetase alpha subunit [EC:6.2.1.5]                                 |
| Fer1_1_1735 | sucC; succinyl-CoA synthetase subunit beta (EC:6.2.1.5); K01903 succinyl-CoA synthetase beta subunit [EC:6.2.1.5]                             |
| Fer1_1_1730 | malate oxidoreductase (malic enzyme)                                                                                                          |
| Fer1_1_1729 | acetyltransferase                                                                                                                             |
| Fer1_1_1728 | aconitate hydratase (EC:4.2.1.3); K01681 aconitate hydratase 1 [EC:4.2.1.3]                                                                   |
| Fer1_1_1719 | tricorn protease; K08676 tricorn protease [EC:3.4.21.-]                                                                                       |
| Fer1_1_1689 | hypothetical protein                                                                                                                          |
| Fer1_1_1676 | carbon monoxide dehydrogenase beta subunit                                                                                                    |
| Fer1_1_1675 | carbon monoxide dehydrogenase alpha subunit                                                                                                   |
| Fer1_1_1674 | carbon monoxide dehydrogenase, medium chain                                                                                                   |
| Fer1_1_1669 | tricorn protease interacting factor F2                                                                                                        |
| Fer1_1_1668 | inosine-5''-monophosphate dehydrogenase                                                                                                       |

|             |                                                                                                                                 |
|-------------|---------------------------------------------------------------------------------------------------------------------------------|
| Fer1_1_1634 | isochorismatase                                                                                                                 |
| Fer1_1_1628 | TPR repeat-containing protein                                                                                                   |
| Fer1_1_1618 | thiamine-phosphate pyrophosphorylase                                                                                            |
| Fer1_1_1611 | rps28e; 30S ribosomal protein S28e; K02979 small subunit ribosomal protein S28e                                                 |
| Fer1_1_1588 | 2-oxoacid--ferredoxin oxidoreductase, alpha subunit; K00174 2-oxoglutarate ferredoxin oxidoreductase subunit alpha [EC:1.2.7.3] |
| Fer1_1_1577 | tyrosyl-tRNA synthetase (EC:6.1.1.1); K01866 tyrosyl-tRNA synthetase [EC:6.1.1.1]                                               |
| Fer1_1_1574 | chromosome partition protein smc; K03529 chromosome hypothetical proteinregation protein                                        |
| Fer1_1_1572 | radA; DNA repair and recombination protein RadA; K04483 DNA repair protein RadA                                                 |
| Fer1_1_1564 | transposase (04)                                                                                                                |
| Fer1_1_1561 | sterol carrier protein                                                                                                          |
| Fer1_1_1557 | aminotransferase class-III                                                                                                      |
| Fer1_1_1553 | dnaK; molecular chaperone DnaK; K04043 molecular chaperone DnaK                                                                 |
| Fer1_1_1548 | FeS oxidoreductase; K06936                                                                                                      |
| Fer1_1_1534 | acyl-CoA dehydrogenase, short-chain specific                                                                                    |
| Fer1_1_1533 | acyl-CoA dehydrogenase (EC:1.3.99.-); K00249 acyl-CoA dehydrogenase [EC:1.3.99.3]                                               |
| Fer1_1_1532 | acetyl-CoA acetyltransferase (EC:2.3.1.9); K00626 acetyl-CoA C-acetyltransferase [EC:2.3.1.9]                                   |
| Fer1_1_1531 | long-chain-fatty-acid--CoA ligase (EC:2.3.1.86); K00666 fatty-acyl-CoA synthase [EC:6.2.1.-]                                    |
| Fer1_1_1530 | 3-hydroxybutyryl-CoA dehydrogenase/3-hydroxybutyryl-CoA dehydratase                                                             |
| Fer1_1_1526 | acetylmethionine aminotransferase (EC:2.6.1.11); K05830 acetylmethionine/acetyl-lysine aminotransferase [EC:2.6.1.11 2.6.1.-]   |
| Fer1_1_1502 | hypothetical protein                                                                                                            |
| Fer1_1_1495 | hypothetical protein                                                                                                            |
| Fer1_1_1491 | DNA polymerase II (EC:2.7.7.7); K02319 DNA polymerase I [EC:2.7.7.7]                                                            |
| Fer1_1_1469 | replication factor A; K07466 replication factor A1                                                                              |
| Fer1_1_1468 | glycine dehydrogenase subunit 2 (EC:1.4.4.2); K00283 glycine dehydrogenase subunit 2 [EC:1.4.4.2]                               |
| Fer1_1_1461 | hypothetical protein                                                                                                            |
| Fer1_1_1455 | S-adenosyl-L-homocysteine hydrolase                                                                                             |
| Fer1_1_1454 | DNA polymerase sliding clamp                                                                                                    |
| Fer1_1_1453 | glutamate dehydrogenase (EC:1.4.1.3); K00261 glutamate dehydrogenase (NAD(P)+) [EC:1.4.1.3]                                     |
| Fer1_1_1450 | 30S ribosomal protein S3Ae                                                                                                      |
| Fer1_1_1418 | DNA integration/recombination/inversion protein                                                                                 |

|             |                                                                                                                                    |
|-------------|------------------------------------------------------------------------------------------------------------------------------------|
| Fer1_1_1416 | HsdR family type I site-specific deoxyribonuclease; K01153 type I restriction enzyme, R subunit [EC:3.1.21.3]                      |
| Fer1_1_1414 | type I restriction-modification system methylation subunit (EC:3.1.21.3); K03427 type I restriction enzyme M protein [EC:2.1.1.72] |
| Fer1_1_1407 | Xaa-Pro dipeptidase (EC:3.4.13.9); K01271 X-Pro dipeptidase [EC:3.4.13.9]                                                          |
| Fer1_1_1367 | homoserine dehydrogenase (EC:1.1.1.3); K00003 homoserine dehydrogenase [EC:1.1.1.3]                                                |
| Fer1_1_1361 | gyrB; DNA gyrase subunit B (EC:5.99.1.3); K02470 DNA gyrase subunit B [EC:5.99.1.3]                                                |
| Fer1_1_1336 | phosphopyruvate hydratase                                                                                                          |
| Fer1_1_1334 | seryl-tRNA synthetase (EC:6.1.1.11); K01875 seryl-tRNA synthetase [EC:6.1.1.11]                                                    |
| Fer1_1_1330 | hypothetical protein                                                                                                               |
| Fer1_1_1326 | uroporphyrin-III C-methyltransferase                                                                                               |
| Fer1_1_1322 | hypothetical protein                                                                                                               |
| Fer1_1_1320 | dihydroorotate dehydrogenase                                                                                                       |
| Fer1_1_1303 | tricorn protease interacting factor F3 (EC:3.4.11.-); K01269 aminopeptidase [EC:3.4.11.-]                                          |
| Fer1_1_1295 | molybdenum cofactor biosynthesis protein A; K06937                                                                                 |
| Fer1_1_1269 | aspartyl-tRNA synthetase                                                                                                           |
| Fer1_1_1263 | hypothetical protein                                                                                                               |
| Fer1_1_1252 | DNA-directed RNA polymerase subunit D (EC:2.7.7.6); K03047 DNA-directed RNA polymerase subunit D [EC:2.7.7.6]                      |
| Fer1_1_1250 | 30S ribosomal protein S4                                                                                                           |
| Fer1_1_1249 | 30S ribosomal protein S13P                                                                                                         |
| Fer1_1_1218 | CRISPR-associated Csh2 family protein                                                                                              |
| Fer1_1_1214 | hypothetical protein                                                                                                               |
| Fer1_1_1206 | alanyl-tRNA synthetase (EC:6.1.1.7); K07050                                                                                        |
| Fer1_1_1179 | DNA-directed RNA polymerase subunit B (EC:2.7.7.6); K13798 DNA-directed RNA polymerase subunit B [EC:2.7.7.6]                      |
| Fer1_1_1178 | DNA-directed RNA polymerase subunit A'''                                                                                           |
| Fer1_1_1177 | DNA-directed RNA polymerase subunit A'' (EC:2.7.7.6); K03042 DNA-directed RNA polymerase subunit A'' [EC:2.7.7.6]                  |
| Fer1_1_1169 | glutamate-1-semialdehyde aminotransferase (EC:5.4.3.8); K01845 glutamate-1-semialdehyde 2,1-aminomutase [EC:5.4.3.8]               |
| Fer1_1_1164 | small nuclear ribonucleoprotein; K04796 small nuclear ribonucleoprotein                                                            |
| Fer1_1_1155 | rpl30p; 50S ribosomal protein L30P; K02907 large subunit ribosomal protein L30                                                     |
| Fer1_1_1154 | 30S ribosomal protein S5P                                                                                                          |

|             |                                                                                                            |
|-------------|------------------------------------------------------------------------------------------------------------|
| Fer1_1_1153 | 50S ribosomal protein L18P                                                                                 |
| Fer1_1_1152 | 50S ribosomal protein L19e                                                                                 |
| Fer1_1_1150 | 50S ribosomal protein L6P                                                                                  |
| Fer1_1_1149 | rps8p; 30S ribosomal protein S8P; K02994 small subunit ribosomal protein S8                                |
| Fer1_1_1147 | 30S ribosomal protein S4e                                                                                  |
| Fer1_1_1145 | rpl14p; 50S ribosomal protein L14P; K02874 large subunit ribosomal protein L14                             |
| Fer1_1_1140 | 30S ribosomal protein S3P                                                                                  |
| Fer1_1_1139 | 50S ribosomal protein L22P                                                                                 |
| Fer1_1_1138 | rps19p; 30S ribosomal protein S19P; K02965 small subunit ribosomal protein S19                             |
| Fer1_1_1137 | rpl2p; 50S ribosomal protein L2P; K02886 large subunit ribosomal protein L2                                |
| Fer1_1_1135 | 50S ribosomal protein L4P                                                                                  |
| Fer1_1_1134 | rpl3p; 50S ribosomal protein L3P; K02906 large subunit ribosomal protein L3                                |
| Fer1_1_1113 | hypothetical protein                                                                                       |
| Fer1_1_1110 | translation initiation factor IF-2 subunit gamma; K03242 translation initiation factor eIF-2 gamma subunit |
| Fer1_1_1106 | DNA-binding protein                                                                                        |
| Fer1_1_1105 | spermidine synthase (EC:2.5.1.16); K00797 spermidine synthase [EC:2.5.1.16]                                |
| Fer1_1_1103 | hypothetical protein                                                                                       |
| Fer1_1_1102 | endonuclease IV                                                                                            |
| Fer1_1_1101 | DNA primase (EC:2.7.7.-)                                                                                   |
| Fer1_1_1100 | putative protease La homolog type 2 (EC:3.4.21.-); K01362 [EC:3.4.21.-]                                    |
| Fer1_1_1095 | glutaredoxin related protein                                                                               |
| Fer1_1_1091 | D-3-phosphoglycerate dehydrogenase                                                                         |
| Fer1_1_1082 | triosephosphate isomerase                                                                                  |
| Fer1_1_1071 | ribosomal protein                                                                                          |
| Fer1_1_1052 | 50S ribosomal protein L31e; K02910 large subunit ribosomal protein L31e                                    |
| Fer1_1_1050 | hypothetical protein; K06875                                                                               |
| Fer1_1_1049 | 30S ribosomal protein S19e                                                                                 |
| Fer1_1_1045 | 4-aminobutyrate aminotransferase (EC:2.6.1.19); K00823 4-aminobutyrate aminotransferase [EC:2.6.1.19]      |
| Fer1_1_1038 | hypothetical protein                                                                                       |
| Fer1_1_1028 | acetyl-CoA acetyltransferase (EC:2.3.1.9); K00626 acetyl-CoA C-acetyltransferase [EC:2.3.1.9]              |
| Fer1_1_1027 | hypothetical protein                                                                                       |
| Fer1_1_1026 | band 7 integral membrane protein-like protein                                                              |



|             |                                                                                                                                     |
|-------------|-------------------------------------------------------------------------------------------------------------------------------------|
| Fer1_1_1024 | hypothetical protein                                                                                                                |
| Fer1_1_1018 | exosome complex RNA-binding protein Rrp42                                                                                           |
| Fer1_1_1017 | exosome complex exonuclease Rrp41                                                                                                   |
| Fer1_1_1016 | exosome complex RNA-binding protein Rrp4                                                                                            |
| Fer1_1_1015 | putative RNA-associated protein                                                                                                     |
| Fer1_1_0982 | peptidyl-prolyl cis-trans isomerase (EC:5.2.1.8); K01802 peptidylprolyl isomerase [EC:5.2.1.8]                                      |
| Fer1_1_0968 | phosphoribosylaminoimidazole synthetase                                                                                             |
| Fer1_1_0967 | ferredoxin                                                                                                                          |
| Fer1_1_0960 | glutamine synthetase (EC:6.3.1.2); K01915 glutamine synthetase [EC:6.3.1.2]                                                         |
| Fer1_1_0955 | hypothetical protein                                                                                                                |
| Fer1_1_0954 | sulfide-quinone oxidoreductase (EC:1.8.5.-); K05908 [EC:1.8.5.-]                                                                    |
| Fer1_1_0950 | 3-isopropylmalate dehydratase large subunit                                                                                         |
| Fer1_1_0936 | V-type ATP synthase subunit A (EC:3.6.3.14); K02117 V-type H <sup>+</sup> -transporting ATPase subunit A [EC:3.6.3.14]              |
| Fer1_1_0935 | V-type ATP synthase subunit B (EC:3.6.3.14); K02118 V-type H <sup>+</sup> -transporting ATPase subunit B [EC:3.6.3.14]              |
| Fer1_1_0930 | gluconate/galactonate dehydratase                                                                                                   |
| Fer1_1_0925 | superoxide dismutase [Fe] (EC:1.15.1.1); K04564 superoxide dismutase, Fe-Mn family [EC:1.15.1.1]                                    |
| Fer1_1_0919 | cell division cycle protein 48; K13525 transitional endoplasmic reticulum ATPase                                                    |
| Fer1_1_0917 | peptide chain release factor 1                                                                                                      |
| Fer1_1_0898 | inosine 5'-monophosphate dehydrogenase                                                                                              |
| Fer1_1_0895 | transcription factor; K03120 transcription initiation factor TFIID TATA-box-binding protein                                         |
| Fer1_1_0891 | GntR family transcriptional regulator                                                                                               |
| Fer1_1_0888 | 30S ribosomal protein S2                                                                                                            |
| Fer1_1_0883 | hisS; histidyl-tRNA synthetase (EC:6.1.1.21); K01892 histidyl-tRNA synthetase [EC:6.1.1.21]                                         |
| Fer1_1_0869 | dihydrolipoamide dehydrogenase (EC:1.8.1.4); K00382 dihydrolipoamide dehydrogenase [EC:1.8.1.4]                                     |
| Fer1_1_0867 | pyruvate dehydrogenase E1 component beta subunit (EC:1.2.4.1); K00162 pyruvate dehydrogenase E1 component subunit beta [EC:1.2.4.1] |
| Fer1_1_0852 | Bacterio-opsin activator HTH domain protein                                                                                         |
| Fer1_1_0843 | ribose-5-phosphate isomerase A                                                                                                      |
| Fer1_1_0837 | acyl-CoA synthetase                                                                                                                 |
| Fer1_1_0833 | sterol binding protein                                                                                                              |
| Fer1_1_0828 | hypothetical protein                                                                                                                |
| Fer1_1_0823 | glyA; serine hydroxymethyltransferase (EC:2.1.2.1); K00600 glycine hydroxymethyltransferase [EC:2.1.2.1]                            |

|             |                                                                                                                                         |
|-------------|-----------------------------------------------------------------------------------------------------------------------------------------|
| Fer1_1_0822 | hypothetical protein                                                                                                                    |
| Fer1_1_0811 | hypothetical protein; K09700 hypothetical protein                                                                                       |
| Fer1_1_0810 | putative peroxiredoxin (EC:1.11.1.15); K03386 peroxiredoxin (alkyl hydroperoxide reductase subunit C) [EC:1.11.1.15]                    |
| Fer1_1_0785 | N-acyl-L-amino acid amidohydrolase (EC:3.5.1.14); K01436 aminoacylase [EC:3.5.1.14]                                                     |
| Fer1_1_0773 | acyl-CoA dehydrogenase (EC:1.3.99.-); K00249 acyl-CoA dehydrogenase [EC:1.3.99.3]                                                       |
| Fer1_1_0766 | hypothetical protein                                                                                                                    |
| Fer1_1_0764 | hypothetical protein                                                                                                                    |
| Fer1_1_0755 | ef1a, tuf; elongation factor 1-alpha (EC:3.6.5.3); K03231 elongation factor EF-1 alpha subunit [EC:3.6.5.3]                             |
| Fer1_1_0754 | rps10p; 30S ribosomal protein S10P; K02946 small subunit ribosomal protein S10                                                          |
| Fer1_1_0751 | transposase (04); K07493 putative transposase                                                                                           |
| Fer1_1_0746 | fusA; elongation factor EF-2; K03234 elongation factor EF-2 [EC:3.6.5.3]                                                                |
| Fer1_1_0742 | heat shock protein                                                                                                                      |
| Fer1_1_0734 | aspA; aspartate ammonia-lyase (EC:4.3.1.1); K01679 fumarate hydratase, class II [EC:4.2.1.2]                                            |
| Fer1_1_0733 | AsnC family transcriptional regulator                                                                                                   |
| Fer1_1_0730 | thioredoxin reductase (EC:1.8.1.9); K00384 thioredoxin reductase (NADPH) [EC:1.8.1.9]                                                   |
| Fer1_1_0722 | rpl11p; 50S ribosomal protein L11P; K02867 large subunit ribosomal protein L11                                                          |
| Fer1_1_0721 | rpl1P; 50S ribosomal protein L1P; K02863 large subunit ribosomal protein L1                                                             |
| Fer1_1_0720 | acidic ribosomal protein P0                                                                                                             |
| Fer1_1_0719 | rpl12p; 50S ribosomal protein L12P; K02869 large subunit ribosomal protein L12                                                          |
| Fer1_1_0718 | peroxiredoxin                                                                                                                           |
| Fer1_1_0706 | succinate-semialdehyde dehydrogenase [NADP+] (EC:1.2.1.16); K00135 succinate-semialdehyde dehydrogenase (NADP+) [EC:1.2.1.16]           |
| Fer1_1_0705 | peptidyl-prolyl cis-trans isomerase (EC:5.2.1.8); K01802 peptidylprolyl isomerase [EC:5.2.1.8]                                          |
| Fer1_1_0701 | rpl13p; 50S ribosomal protein L13P; K02871 large subunit ribosomal protein L13                                                          |
| Fer1_1_0700 | rps9p; 30S ribosomal protein S9P; K02996 small subunit ribosomal protein S9                                                             |
| Fer1_1_0688 | proteasome subunit alpha (EC:3.4.25.1); K03432 proteasome alpha subunit [EC:3.4.25.1]                                                   |
| Fer1_1_0651 | ribonucleotide-diphosphate reductase subunit alpha (EC:1.17.4.1); K00525 ribonucleoside-diphosphate reductase alpha chain [EC:1.17.4.1] |
| Fer1_1_0649 | electron transfer flavoprotein subunit beta; K03521 electron transfer flavoprotein beta subunit                                         |
| Fer1_1_0635 | NADH-dependent oxidoreductase                                                                                                           |
| Fer1_1_0633 | thermosome subunit                                                                                                                      |

|             |                                                                                                   |
|-------------|---------------------------------------------------------------------------------------------------|
| Fer1_1_0632 | thioredoxin reductase (EC:1.8.1.9); K00384 thioredoxin reductase (NADPH) [EC:1.8.1.9]             |
| Fer1_1_0631 | ornithine carbamoyltransferase                                                                    |
| Fer1_1_0626 | DNA/RNA-binding protein Alba; K03622 archaea-specific DNA-binding protein                         |
| Fer1_1_0618 | Fe-S oxidoreductase                                                                               |
| Fer1_1_0611 | single-stranded DNA-binding protein; K07466 replication factor A1                                 |
| Fer1_1_0556 | transketolase subunit A                                                                           |
| Fer1_1_0554 | putative transaldolase                                                                            |
| Fer1_1_0551 | proteasome beta subunit (EC:3.4.25.1); K03433 proteasome beta subunit [EC:3.4.25.1]               |
| Fer1_1_0546 | chaperonin GroEL                                                                                  |
| Fer1_1_0540 | hypothetical protein; K09700 hypothetical protein                                                 |
| Fer1_1_0520 | universal stress protein                                                                          |
| Fer1_1_0506 | putative NTPase                                                                                   |
| Fer1_1_0482 | hypothetical protein                                                                              |
| Fer1_1_0464 | urocanate hydratase                                                                               |
| Fer1_1_0419 | cytochrome P450 (EC:1.14.14.1); K00493 unspecific monooxygenase [EC:1.14.14.1]                    |
| Fer1_1_0410 | S-adenosylmethionine synthetase (EC:2.5.1.6); K00789 S-adenosylmethionine synthetase [EC:2.5.1.6] |
| Fer1_1_0383 | hypothetical protein                                                                              |
| Fer1_1_0371 | dehydrogenase, E1 component                                                                       |
| Fer1_1_0368 | isocitrate dehydrogenase                                                                          |
| Fer1_1_0330 | dihydroxy-acid dehydratase; K01687 dihydroxy-acid dehydratase [EC:4.2.1.9]                        |
| Fer1_1_0323 | acetyl-CoA acetyltransferase (EC:2.3.1.9); K00626 acetyl-CoA C-acetyltransferase [EC:2.3.1.9]     |
| Fer1_1_0311 | hypothetical protein                                                                              |
| Fer1_1_0309 | alkyl hydroperoxide reductase subunit c                                                           |
| Fer1_1_0285 | putative peroxiredoxin                                                                            |
| Fer1_1_0272 | hypothetical protein                                                                              |
| Fer1_1_0271 | 3-hydroxy-3-methylglutaryl-coenzyme A reductase                                                   |
| Fer1_1_0250 | long-chain-fatty-acid-CoA ligase                                                                  |
| Fer1_1_0249 | citrate synthase (EC:2.3.3.5); K01647 citrate synthase [EC:2.3.3.1]                               |
| Fer1_1_0248 | CBS domain-containing protein                                                                     |
| Fer1_1_0246 | electron transfer flavoprotein alpha and beta-subunit                                             |
| Fer1_1_0245 | FixC protein; K00313 electron transfer flavoprotein-quinone oxidoreductase [EC:1.5.5.-]           |
| Fer1_1_0235 | hypothetical protein                                                                              |

|                |                                                                                                                                   |
|----------------|-----------------------------------------------------------------------------------------------------------------------------------|
| Fer1_1_0232    | phosphoribosylaminoimidazole carboxylase catalytic subunit; K01588 5-(carboxyamino)imidazole ribonucleotide mutase [EC:5.4.99.18] |
| Fer1_1_0229    | gamma-glutamyltranspeptidase (EC:2.3.2.2); K00681 gamma-glutamyltranspeptidase [EC:2.3.2.2]                                       |
| Fer1_1_0201    | oxidoreductase                                                                                                                    |
| Fer1_1_0199    | 3-ketoacyl-(acyl-carrier-protein) reductase                                                                                       |
| Fer1_1_0188    | hypothetical protein                                                                                                              |
| Fer1_1_0183    | aspartate aminotransferase                                                                                                        |
| Fer1_1_0167    | pyruvate dehydrogenase (EC:1.2.2.2); K00156 pyruvate dehydrogenase (cytochrome) [EC:1.2.2.2]                                      |
| Fer1_1_0166    | geranylgeranyl hydrogenase                                                                                                        |
| Fer1_1_0158    | alcohol dehydrogenase ; K00001 alcohol dehydrogenase [EC:1.1.1.1]                                                                 |
| Fer1_1_0158    | alcohol dehydrogenase ; K00001 alcohol dehydrogenase [EC:1.1.1.1]                                                                 |
| Fer1_1_0157    | inorganic pyrophosphatase                                                                                                         |
| Fer1_1_0143    | TenA/THI-4 family protein                                                                                                         |
| Fer1_1_0139    | peptide ABC transporter ATP-binding protein; K02032 peptide/nickel transport system ATP-binding protein                           |
| Fer1_1_0139    | peptide ABC transporter ATP-binding protein; K02032 peptide/nickel transport system ATP-binding protein                           |
| Fer1_1_0117    | glutamine synthetase (EC:6.3.1.2); K01915 glutamine synthetase [EC:6.3.1.2]                                                       |
| Fer1_1_0101    | acetyl-coenzyme A synthetase (EC:6.2.1.1); K01895 acetyl-CoA synthetase [EC:6.2.1.1]                                              |
| Fer1_1_0089    | transposase (04); K07493 putative transposase                                                                                     |
| Fer1_1_0080    | cellulose synthase (UDP-forming)                                                                                                  |
| EPL_17965_0565 | transferase hexapeptide domain protein                                                                                            |
| EPL_17965_0560 | integrase/recombinase                                                                                                             |
| EPL_17965_0557 | rfc; replication factor C small subunit; K04801 replication factor C small subunit                                                |
| EPL_17965_0549 | hypothetical protein                                                                                                              |
| EPL_17965_0547 | argS; arginyl-tRNA synthetase (EC:6.1.1.19); K01887 arginyl-tRNA synthetase [EC:6.1.1.19]                                         |
| EPL_17965_0538 | Fe-S oxidoreductase (EC:1.8.-.-); K03423 [EC:1.8.-.-]                                                                             |
| EPL_17965_0531 | transcription regulator                                                                                                           |
| EPL_17965_0528 | rps2P; 30S ribosomal protein S2; K02967 small subunit ribosomal protein S2                                                        |
| EPL_17965_0526 | GTPase; K06883                                                                                                                    |
| EPL_17965_0525 | transcription regulator                                                                                                           |
| EPL_17965_0522 | transcription factor; K03120 transcription initiation factor TFIID TATA-box-binding protein                                       |
| EPL_17965_0517 | inosine 5'-monophosphate dehydrogenase (EC:1.1.1.205); K00088 IMP dehydrogenase [EC:1.1.1.205]                                    |
| EPL_17965_0516 | thermopsin precursor related protein                                                                                              |

|                |                                                                                                                  |
|----------------|------------------------------------------------------------------------------------------------------------------|
| EPL_17965_0512 | putative nitrite reductase/sulfite reductase                                                                     |
| EPL_17965_0511 | formyltetrahydrofolate synthetase; K01938 formate--tetrahydrofolate ligase [EC:6.3.4.3]                          |
| EPL_17965_0505 | aromatic acid decarboxylase; K03186 3-octaprenyl-4-hydroxybenzoate carboxy-lyase UbiX [EC:4.1.1.-]               |
| EPL_17965_0500 | signal recognition particle protein SRP54; K03106 signal recognition particle subunit SRP54                      |
| EPL_17965_0498 | CoA-binding protein; K06929                                                                                      |
| EPL_17965_0495 | protein tyrosine phosphatase                                                                                     |
| EPL_17965_0491 | NAD-dependent aldehyde dehydrogenase; K00130 betaine-aldehyde dehydrogenase [EC:1.2.1.8]                         |
| EPL_17965_0490 | alcohol dehydrogenase IV; K00001 alcohol dehydrogenase [EC:1.1.1.1]                                              |
| EPL_17965_0489 | sterol carrier protein                                                                                           |
| EPL_17965_0466 | hypothetical protein                                                                                             |
| EPL_17965_0459 | hypothetical protein                                                                                             |
| EPL_17965_0456 | small heat shock protein (HSP20) related protein                                                                 |
| EPL_17965_0455 | ABC transporter related protein                                                                                  |
| EPL_17965_0453 | ef1B; elongation factor 1-beta; K03232 elongation factor EF-1 beta subunit                                       |
| EPL_17965_0451 | phosphomannomutase; K01835 phosphoglucomutase [EC:5.4.2.2]; K01840 phosphomannomutase [EC:5.4.2.8]               |
| EPL_17965_0441 | S-adenosyl-L-homocysteine hydrolase (EC:3.3.1.1); K01251 adenosylhomocysteinase [EC:3.3.1.1]                     |
| EPL_17965_0440 | cofactor-independent phosphoglycerate mutase (EC:5.4.2.1); K01834 phosphoglycerate mutase [EC:5.4.2.1]           |
| EPL_17965_0438 | seryl-tRNA synthetase (EC:6.1.1.11); K01875 seryl-tRNA synthetase [EC:6.1.1.11]                                  |
| EPL_17965_0437 | putative oxidoreductase; K00266 glutamate synthase (NADPH/NADH) small chain [EC:1.4.1.13 1.4.1.14]               |
| EPL_17965_0431 | glpQ; putative phosphodiesterase (EC:3.1.4.46); K01126 glycerophosphoryl diester phosphodiesterase [EC:3.1.4.46] |
| EPL_17965_0429 | NADH-dependent oxidoreductase (EC:1.6.-.-); K00359 NADH oxidase [EC:1.6.-.-]                                     |
| EPL_17965_0428 | hypothetical protein                                                                                             |
| EPL_17965_0427 | DNA polymerase sliding clamp; K04802 proliferating cell nuclear antigen                                          |
| EPL_17965_0424 | hypothetical protein                                                                                             |
| EPL_17965_0423 | malate dehydrogenase (EC:1.1.1.37); K00024 malate dehydrogenase [EC:1.1.1.37]                                    |
| EPL_17965_0419 | protein of unknown function DUF835                                                                               |
| EPL_17965_0418 | ATPase                                                                                                           |
| EPL_17965_0416 | peptidase M61 domain-containing protein                                                                          |
| EPL_17965_0414 | hypothetical protein                                                                                             |
| EPL_17965_0410 | hypothetical protein                                                                                             |
| EPL_17965_0403 | protein of unknown function DUF1621; K09152 hypothetical protein                                                 |

|                |                                                                                                                                      |
|----------------|--------------------------------------------------------------------------------------------------------------------------------------|
| EPL_17965_0402 | regulator of amino acid metabolism; K07103                                                                                           |
| EPL_17965_0401 | radA; DNA repair and recombination protein RADA; K04483 DNA repair protein RadA                                                      |
| EPL_17965_0400 | glyceraldehyde-3-phosphate dehydrogenase (EC:1.2.1.59); K00150 glyceraldehyde-3-phosphate dehydrogenase (NAD(P)) [EC:1.2.1.59]       |
| EPL_17965_0395 | proteasome subunit alpha (EC:3.4.25.1); K03432 proteasome alpha subunit [EC:3.4.25.1]                                                |
| EPL_17965_0393 | putative RNA-associated protein; K07582 hypothetical protein                                                                         |
| EPL_17965_0392 | exosome complex RNA-binding protein Rrp4; K03679 exosome complex component RRP4                                                      |
| EPL_17965_0391 | exosome complex exonuclease Rrp41; K11600 exosome complex component RRP41                                                            |
| EPL_17965_0390 | exosome complex RNA-binding protein Rrp42; K12589 exosome complex component RRP42                                                    |
| EPL_17965_0389 | rpl37ae; 50S ribosomal protein L37Ae; K02921 large subunit ribosomal protein L37Ae                                                   |
| EPL_17965_0386 | hypothetical protein                                                                                                                 |
| EPL_17965_0385 | RNA-binding protein; K07572 putative nucleotide binding protein                                                                      |
| EPL_17965_0383 | band 7 integral membrane protein-like protein                                                                                        |
| EPL_17965_0378 | hypothetical protein                                                                                                                 |
| EPL_17965_0375 | hypothetical protein                                                                                                                 |
| EPL_17965_0353 | Methylmalonyl-CoA mutase                                                                                                             |
| EPL_17965_0352 | methylmalonyl-CoA mutase alpha subunit (EC:5.4.99.2); K01849 methylmalonyl-CoA mutase, C-terminal domain [EC:5.4.99.2]               |
| EPL_17965_0349 | cystathionine beta-synthase; K01697 cystathionine beta-synthase [EC:4.2.1.22]                                                        |
| EPL_17965_0348 | cystathionine gamma-lyase (EC:4.4.1.1); K01758 cystathionine gamma-lyase [EC:4.4.1.1]                                                |
| EPL_17965_0345 | succinate dehydrogenase and fumarate reductase iron-sulfur protein; K00240 succinate dehydrogenase iron-sulfur protein [EC:1.3.99.1] |
| EPL_17965_0344 | sdhA; succinate dehydrogenase flavoprotein subunit; K00239 succinate dehydrogenase flavoprotein subunit [EC:1.3.99.1]                |
| EPL_17965_0342 | hypothetical protein                                                                                                                 |
| EPL_17965_0334 | gliding motility protein related; K01990 ABC-2 type transport system ATP-binding protein                                             |
| EPL_17965_0333 | methyltransferase                                                                                                                    |
| EPL_17965_0332 | cysS; cysteinyl-tRNA synthetase (EC:6.1.1.16); K01883 cysteinyl-tRNA synthetase [EC:6.1.1.16]                                        |
| EPL_17965_0330 | nicotinate phosphoribosyltransferase (EC:2.4.2.11); K00763 nicotinate phosphoribosyltransferase [EC:2.4.2.11]                        |
| EPL_17965_0327 | hypothetical protein                                                                                                                 |
| EPL_17965_0324 | glutamate dehydrogenase; K00261 glutamate dehydrogenase (NAD(P)+) [EC:1.4.1.3]                                                       |
| EPL_17965_0320 | 1,4-alpha-glucan branching enzyme (EC:2.4.1.18); K00700 1,4-alpha-glucan branching enzyme [EC:2.4.1.18]                              |
| EPL_17965_0319 | trehalose synthase (EC:5.4.99.16); K05343 maltose alpha-D-glucosyltransferase [EC:5.4.99.16]                                         |

|                |                                                                                                                                    |
|----------------|------------------------------------------------------------------------------------------------------------------------------------|
| EPL_17965_0313 | tfb; transcription initiation factor IIB; K03124 transcription initiation factor TFIIB                                             |
| EPL_17965_0311 | tfb; transcription initiation factor IIB; K03124 transcription initiation factor TFIIB                                             |
| EPL_17965_0303 | DNA gyrase subunit B (Fragment)                                                                                                    |
| EPL_17965_0302 | DNA gyrase subunit A; K02469 DNA gyrase subunit A [EC:5.99.1.3]                                                                    |
| EPL_17965_0301 | homoserine dehydrogenase (EC:1.1.1.3); K00003 homoserine dehydrogenase [EC:1.1.1.3]                                                |
| EPL_17965_0300 | hypothetical protein                                                                                                               |
| EPL_17965_0297 | acetyl-CoA acetyltransferase (EC:2.3.1.9); K00626 acetyl-CoA C-acetyltransferase [EC:2.3.1.9]                                      |
| EPL_17965_0296 | hypothetical protein; K07068                                                                                                       |
| EPL_17965_0293 | chaperonin GroEL                                                                                                                   |
| EPL_17965_0292 | sucC; succinyl-CoA synthetase subunit beta (EC:6.2.1.5); K01903 succinyl-CoA synthetase beta subunit [EC:6.2.1.5]                  |
| EPL_17965_0291 | succinyl-CoA synthetase subunit alpha (EC:6.2.1.5); K01902 succinyl-CoA synthetase alpha subunit [EC:6.2.1.5]                      |
| EPL_17965_0290 | ornithine carbamoyltransferase (EC:2.1.3.3); K00611 ornithine carbamoyltransferase [EC:2.1.3.3]                                    |
| EPL_17965_0288 | hypothetical protein                                                                                                               |
| EPL_17965_0282 | hypothetical protein; K07327 archaeal flagellar protein FlaD                                                                       |
| EPL_17965_0281 | flagellar protein C; K07822 archaeal flagellar protein FlaC                                                                        |
| EPL_17965_0280 | flagellin; K07325 archaeal flagellin FlaB                                                                                          |
| EPL_17965_0278 | pheT; phenylalanyl-tRNA synthetase subunit beta (EC:6.1.1.20); K01890 phenylalanyl-tRNA synthetase beta chain [EC:6.1.1.20]        |
| EPL_17965_0271 | rps15p; 30S ribosomal protein S15P; K02956 small subunit ribosomal protein S15                                                     |
| EPL_17965_0270 | Molybdenum cofactor biosynthesis protein                                                                                           |
| EPL_17965_0266 | short chain dehydrogenase                                                                                                          |
| EPL_17965_0262 | hypothetical protein                                                                                                               |
| EPL_17965_0261 | fabG; 3-ketoacyl-(acyl-carrier-protein) reductase (EC:1.1.1.100); K00059 3-oxoacyl-[acyl-carrier protein] reductase [EC:1.1.1.100] |
| EPL_17965_0260 | NAD-dependent aldehyde dehydrogenase; K00294 1-pyrroline-5-carboxylate dehydrogenase [EC:1.5.1.12]                                 |
| EPL_17965_0258 | phosphoenolpyruvate carboxykinase (EC:4.1.1.32); K01596 phosphoenolpyruvate carboxykinase (GTP) [EC:4.1.1.32]                      |
| EPL_17965_0254 | translation initiation factor IF-2; K03243 translation initiation factor IF-2 unclassified subunit                                 |
| EPL_17965_0253 | ndk; nucleoside diphosphate kinase; K00940 nucleoside-diphosphate kinase [EC:2.7.4.6]                                              |
| EPL_17965_0251 | rps28e; 30S ribosomal protein S28e; K02979 small subunit ribosomal protein S28e                                                    |
| EPL_17965_0250 | rpl7ae; 50S ribosomal protein L7Ae; K02936 large subunit ribosomal protein L7Ae                                                    |
| EPL_17965_0249 | dihydrodipicolinate synthetase; K01714 dihydrodipicolinate synthase [EC:4.2.1.52]                                                  |

|                |                                                                                                                                  |
|----------------|----------------------------------------------------------------------------------------------------------------------------------|
| EPL_17965_0236 | hypothetical protein                                                                                                             |
| EPL_17965_0228 | hypothetical protein                                                                                                             |
| EPL_17965_0222 | hypothetical protein                                                                                                             |
| EPL_17965_0220 | metal-dependent hydrolase                                                                                                        |
| EPL_17965_0219 | hypothetical protein                                                                                                             |
| EPL_17965_0216 | alanyl-tRNA synthetase (EC:6.1.1.7); K07050                                                                                      |
| EPL_17965_0211 | rpl10e; 50S ribosomal protein L10e; K02866 large subunit ribosomal protein L10e                                                  |
| EPL_17965_0210 | agmatinase; K01480 agmatinase [EC:3.5.3.11]                                                                                      |
| EPL_17965_0209 | translation initiation factor IF-5A; K03263 translation initiation factor eIF-5A                                                 |
| EPL_17965_0206 | small nuclear ribonucleoprotein; K04796 small nuclear ribonucleoprotein                                                          |
| EPL_17965_0194 | 2-oxoglutarate synthase, alpha chain (EC:1.2.7.3); K00174 2-oxoglutarate ferredoxin oxidoreductase subunit alpha [EC:1.2.7.3]    |
| EPL_17965_0193 | 2-oxoglutarate ferredoxin oxidoreductase subunit beta; K00175 2-oxoglutarate ferredoxin oxidoreductase subunit beta [EC:1.2.7.3] |
| EPL_17965_0191 | peptide chain release factor 1; K03265 peptide chain release factor eRF subunit 1                                                |
| EPL_17965_0190 | hypothetical protein                                                                                                             |
| EPL_17965_0189 | tricorn protease interacting factor F2 (EC:3.4.11.-); K13722 tricorn protease interacting factor F2/3 [EC:3.4.11.-]              |
| EPL_17965_0187 | VAT ATPase (VCP-like ATPase); K13525 transitional endoplasmic reticulum ATPase                                                   |
| EPL_17965_0179 | acetyl-CoA acetyltransferase                                                                                                     |
| EPL_17965_0175 | 2-phosphoglycerate kinase; K05715 2-phosphoglycerate kinase [EC:2.7.2.-]                                                         |
| EPL_17965_0174 | amidohydrolase                                                                                                                   |
| EPL_17965_0165 | carboxymethylenebutenolidase (EC:3.1.1.45); K01061 carboxymethylenebutenolidase [EC:3.1.1.45]                                    |
| EPL_17965_0160 | beta-hydroxybutyryl-CoA dehydrogenase related protein; K00074 3-hydroxybutyryl-CoA dehydrogenase [EC:1.1.1.157]                  |
| EPL_17965_0158 | aspC; aspartyl-tRNA synthetase (EC:6.1.1.12); K01876 aspartyl-tRNA synthetase [EC:6.1.1.12]                                      |
| EPL_17965_0155 | transcription regulator; K00845 glucokinase [EC:2.7.1.2]                                                                         |
| EPL_17965_0147 | Rieske Fe-S protein                                                                                                              |
| EPL_17965_0144 | 3-oxoacyl-[acyl-carrier-protein] reductase (EC:1.1.1.100); K00059 3-oxoacyl-[acyl-carrier protein] reductase [EC:1.1.1.100]      |
| EPL_17965_0138 | phosphoribosylformylglycinamide synthase II (EC:6.3.5.3); K01952 phosphoribosylformylglycinamide synthase [EC:6.3.5.3]           |
| EPL_17965_0137 | purS; phosphoribosylformylglycinamide synthase (EC:6.3.5.3); K01952 phosphoribosylformylglycinamide synthase [EC:6.3.5.3]        |



|                |                                                                                                                 |
|----------------|-----------------------------------------------------------------------------------------------------------------|
| EPL_17965_0133 | putative NTPase; K06928                                                                                         |
| EPL_17965_0126 | acyl-CoA hydrolase                                                                                              |
| EPL_17965_0124 | hypothetical protein                                                                                            |
| EPL_17965_0123 | hypothetical protein; K09721 hypothetical protein                                                               |
| EPL_17965_0119 | ATP-dependent protease Lon; K04076 Lon-like ATP-dependent protease [EC:3.4.21.-]                                |
| EPL_17965_0116 | hypothetical protein                                                                                            |
| EPL_17965_0113 | ATPase; K03924 MoxR-like ATPase [EC:3.6.3.-]                                                                    |
| EPL_17965_0112 | hypothetical protein                                                                                            |
| EPL_17965_0102 | hypothetical protein; K09732 hypothetical protein                                                               |
| EPL_17965_0099 | 2-hydroxyhepta-2,4-diene-1,7-dioate isomerase                                                                   |
| EPL_17965_0096 | TenA/THI-4 family protein                                                                                       |
| EPL_17965_0094 | putative DNA-binding protein; K06934                                                                            |
| EPL_17965_0092 | homogentisate 1,2-dioxygenase (EC:1.13.11.5); K00451 homogentisate 1,2-dioxygenase [EC:1.13.11.5]               |
| EPL_17965_0091 | fumarylacetoacetase (EC:3.7.1.2)                                                                                |
| EPL_17965_0090 | 4-hydroxyphenylpyruvate dioxygenase (EC:1.13.11.27); K00457 4-hydroxyphenylpyruvate dioxygenase [EC:1.13.11.27] |
| EPL_17965_0085 | hypothetical protein                                                                                            |
| EPL_17965_0081 | chromosome partition protein smc; K03529 chromosome hypothetical proteinregation protein                        |
| EPL_17965_0078 | dcd; deoxycytidine triphosphate deaminase (EC:3.5.4.13); K01494 dCTP deaminase [EC:3.5.4.13]                    |
| EPL_17965_0075 | phosphoribosylamine--glycine ligase (EC:6.3.4.13); K01945 phosphoribosylamine--glycine ligase [EC:6.3.4.13]     |
| EPL_17965_0068 | hypothetical protein                                                                                            |
| EPL_17965_0058 | single-stranded DNA-binding protein; K07466 replication factor A1                                               |
| EPL_17965_0057 | cobalamin periplasmic binding protein                                                                           |
| EPL_17965_0050 | glucoamylase (EC:3.2.1.3); K01178 glucoamylase [EC:3.2.1.3]                                                     |
| EPL_17965_0048 | acetyltransferase                                                                                               |
| EPL_17965_0047 | eno; phosphopyruvate hydratase (EC:4.2.1.11); K01689 enolase [EC:4.2.1.11]                                      |
| EPL_17965_0045 | hypothetical protein                                                                                            |
| EPL_17965_0044 | heat shock protein GrpE related protein; K03687 molecular chaperone GrpE                                        |
| EPL_17965_0043 | dnaK; molecular chaperone DnaK; K04043 molecular chaperone DnaK                                                 |
| EPL_17965_0040 | transposase IS4 family protein                                                                                  |
| EPL_17965_0039 | universal stress protein                                                                                        |
| EPL_17965_0038 | rps17E; 30S ribosomal protein S17e; K02962 small subunit ribosomal protein S17e                                 |

|                |                                                                                                                                           |
|----------------|-------------------------------------------------------------------------------------------------------------------------------------------|
| EPL_17965_0037 | acetyl-CoA acetyltransferase (EC:2.3.1.9); K00626 acetyl-CoA C-acetyltransferase [EC:2.3.1.9]                                             |
| EPL_17965_0035 | enoyl-CoA hydratase; K01692 enoyl-CoA hydratase [EC:4.2.1.17]                                                                             |
| EPL_17965_0031 | pyrB; aspartate carbamoyltransferase catalytic subunit (EC:2.1.3.2); K00609 aspartate carbamoyltransferase catalytic subunit [EC:2.1.3.2] |
| EPL_17965_0030 | aspartate carbamoyltransferase regulatory subunit (EC:2.1.3.2); K00610 aspartate carbamoyltransferase regulatory subunit                  |
| EPL_17965_0016 | hypothetical protein                                                                                                                      |
| EPL_17965_0015 | NDP-hexose 2,3-enoyl reductase TylCII related protein                                                                                     |
| EPL_17965_0014 | DNA repair helicase                                                                                                                       |
| EPL_15833_0088 | hypothetical protein                                                                                                                      |
| EPL_15833_0087 | aldo/keto reductase                                                                                                                       |
| EPL_15833_0083 | domain of unknown function DUF1731; K07071                                                                                                |
| EPL_15833_0076 | acyl-coenzyme A synthetase; K01895 acetyl-CoA synthetase [EC:6.2.1.1]                                                                     |
| EPL_15833_0073 | 4-aminobutyrate aminotransferase (EC:2.6.1.19); K00823 4-aminobutyrate aminotransferase [EC:2.6.1.19]                                     |
| EPL_15833_0072 | hypothetical protein                                                                                                                      |
| EPL_15833_0069 | 30S ribosomal protein S19e; K02966 small subunit ribosomal protein S19e                                                                   |
| EPL_15833_0066 | 50S ribosomal protein L31e; K02910 large subunit ribosomal protein L31e                                                                   |
| EPL_15833_0064 | pyrE; orotate phosphoribosyltransferase (EC:2.4.2.10); K00762 orotate phosphoribosyltransferase [EC:2.4.2.10]                             |
| EPL_15833_0061 | hypothetical protein                                                                                                                      |
| EPL_15833_0059 | hutU; urocanate hydratase (EC:4.2.1.49); K01712 urocanate hydratase [EC:4.2.1.49]                                                         |
| EPL_15833_0058 | adenylosuccinate synthetase (EC:6.3.4.4); K01939 adenylosuccinate synthase [EC:6.3.4.4]                                                   |
| EPL_15833_0057 | isocitrate dehydrogenase; K00031 isocitrate dehydrogenase [EC:1.1.1.42]                                                                   |
| EPL_15833_0054 | hypothetical protein                                                                                                                      |
| EPL_15833_0051 | hypothetical protein                                                                                                                      |
| EPL_15833_0050 | acyl-CoA dehydrogenase-like protein                                                                                                       |
| EPL_15833_0049 | acyl-CoA dehydrogenase; K00249 acyl-CoA dehydrogenase [EC:1.3.99.3]                                                                       |
| EPL_15833_0048 | acetyl-CoA acetyltransferase (EC:2.3.1.9); K00626 acetyl-CoA C-acetyltransferase [EC:2.3.1.9]                                             |
| EPL_15833_0046 | electron transfer flavoprotein subunit beta; K03521 electron transfer flavoprotein beta subunit                                           |
| EPL_15833_0045 | electron transfer flavoprotein subunit alpha related protein; K03522 electron transfer flavoprotein alpha subunit                         |
| EPL_15833_0041 | hypothetical protein                                                                                                                      |
| EPL_15833_0040 | branched-chain amino acid aminotransferase; K00826 branched-chain amino acid aminotransferase [EC:2.6.1.42]                               |
| EPL_15833_0038 | 3-methyl-2-oxobutanoate dehydrogenase alpha chain precursor; K00161 pyruvate dehydrogenase E1 component                                   |

|                |                                                                                                                           |
|----------------|---------------------------------------------------------------------------------------------------------------------------|
|                | subunit alpha [EC:1.2.4.1]                                                                                                |
| EPL_15833_0037 | 3-methyl-2-oxobutanoate dehydrogenase chain E1-beta; K00162 pyruvate dehydrogenase E1 component subunit beta [EC:1.2.4.1] |
| EPL_15251_0046 | pyrG; CTP synthetase (EC:6.3.4.2); K01937 CTP synthase [EC:6.3.4.2]                                                       |
| EPL_15251_0043 | superoxide dismutase; K04564 superoxide dismutase, Fe-Mn family [EC:1.15.1.1]                                             |
| EPL_15251_0041 | aconitate hydratase (EC:4.2.1.3); K01681 aconitate hydratase 1 [EC:4.2.1.3]                                               |
| EPL_15251_0040 | galactonate dehydratase                                                                                                   |
| EPL_15251_0039 | RecA-superfamily ATPase implicated in signal transduction-like protein                                                    |
| EPL_15251_0037 | glyA; serine hydroxymethyltransferase (EC:2.1.2.1); K00600 glycine hydroxymethyltransferase [EC:2.1.2.1]                  |
| EPL_15251_0035 | aminomethyltransferase (glycine cleavage system T protein); K00605 aminomethyltransferase [EC:2.1.2.10]                   |
| EPL_15251_0028 | SMC domain-containing protein                                                                                             |
| EPL_15251_0009 | hypothetical protein                                                                                                      |
| EPL_15251_0008 | hypothetical protein                                                                                                      |
| EPL_15251_0006 | helicase domain-containing protein                                                                                        |
| EPL_15251_0003 | hypothetical protein                                                                                                      |
| EPL_15243_0827 | peroxiredoxin                                                                                                             |
| EPL_15243_0821 | long-chain-fatty-acid--CoA ligase (EC:2.3.1.86); K00666 fatty-acyl-CoA synthase [EC:6.2.1.-]                              |
| EPL_15243_0819 | putative transaldolase (EC:2.2.1.2); K00616 transaldolase [EC:2.2.1.2]                                                    |
| EPL_15243_0818 | transketolase; K00615 transketolase [EC:2.2.1.1]                                                                          |
| EPL_15243_0817 | transketolase subunit A (EC:2.2.1.1); K00615 transketolase [EC:2.2.1.1]                                                   |
| EPL_15243_0816 | cell division protein FtsZ; K03531 cell division protein FtsZ                                                             |
| EPL_15243_0811 | malate oxidoreductase (malic enzyme); K00027 malate dehydrogenase (oxaloacetate-decarboxylating) [EC:1.1.1.38]            |
| EPL_15243_0810 | acetyltransferase                                                                                                         |
| EPL_15243_0807 | aspartate aminotransferase (EC:2.6.1.1); K00812 aspartate aminotransferase [EC:2.6.1.1]                                   |
| EPL_15243_0804 | diaminopimelate aminotransferase; K01439 succinyl-diaminopimelate desuccinylase [EC:3.5.1.18]                             |
| EPL_15243_0803 | hypothetical protein; K01881 prolyl-tRNA synthetase [EC:6.1.1.15]; K01885 glutamyl-tRNA synthetase [EC:6.1.1.17]          |
| EPL_15243_0797 | hypothetical protein                                                                                                      |
| EPL_15243_0793 | ileS; isoleucyl-tRNA synthetase (EC:6.1.1.5); K01870 isoleucyl-tRNA synthetase [EC:6.1.1.5]                               |
| EPL_15243_0788 | hypothetical protein                                                                                                      |
| EPL_15243_0772 | phosphoheptose isomerase; K03271 phosphoheptose isomerase [EC:5.-.-.-]                                                    |

|                |                                                                                                                                                           |
|----------------|-----------------------------------------------------------------------------------------------------------------------------------------------------------|
| EPL_15243_0767 | Alcohol dehydrogenase (NADP(+))                                                                                                                           |
| EPL_15243_0766 | zinc metalloprotease (EC:3.4.24.-); K07386 putative endopeptidase [EC:3.4.24.-]                                                                           |
| EPL_15243_0765 | nucleoside-diphosphate-sugar epimerase; K01795 [EC:5.1.3.-]                                                                                               |
| EPL_15243_0764 | kinase related to galactokinase and mevalonate kinase; K07031                                                                                             |
| EPL_15243_0763 | NAD-dependent epimerase/dehydratase                                                                                                                       |
| EPL_15243_0758 | NADH ubiquinone oxidoreductase, 20 kDa subunit                                                                                                            |
| EPL_15243_0750 | thioredoxin; K03671 thioredoxin 1                                                                                                                         |
| EPL_15243_0745 | NAD-dependent aldehyde dehydrogenase; K00155 [EC:1.2.1.-]                                                                                                 |
| EPL_15243_0744 | alsS; acetolactate synthase; K01652 acetolactate synthase I/II/III large subunit [EC:2.2.1.6]                                                             |
| EPL_15243_0737 | 30S ribosomal protein S3Ae; K02984 small subunit ribosomal protein S3Ae                                                                                   |
| EPL_15243_0734 | isovaleryl-CoA dehydrogenase; K00253 isovaleryl-CoA dehydrogenase [EC:1.3.99.10]                                                                          |
| EPL_15243_0733 | DNA-directed RNA polymerase subunit E'; K03049 DNA-directed RNA polymerase subunit E' [EC:2.7.7.6]                                                        |
| EPL_15243_0731 | rps24e; 30S ribosomal protein S24e; K02974 small subunit ribosomal protein S24e                                                                           |
| EPL_15243_0723 | hypothetical protein                                                                                                                                      |
| EPL_15243_0711 | hypothetical protein                                                                                                                                      |
| EPL_15243_0710 | hypothetical protein; K07114                                                                                                                              |
| EPL_15243_0691 | prefoldin subunit beta; K04798 prefoldin beta subunit                                                                                                     |
| EPL_15243_0689 | 6,7-dimethyl-8-ribityllumazine synthase (EC:2.5.1.9); K00794 riboflavin synthase beta chain [EC:2.5.1.-]                                                  |
| EPL_15243_0681 | TPR repeat-containing protein                                                                                                                             |
| EPL_15243_0680 | proline dipeptidase related protein; K01271 X-Pro dipeptidase [EC:3.4.13.9]                                                                               |
| EPL_15243_0675 | metal-dependent RNase; K07041                                                                                                                             |
| EPL_15243_0674 | proteasome protease subunit beta; K03433 proteasome beta subunit [EC:3.4.25.1]                                                                            |
| EPL_15243_0673 | inosine-5'-monophosphate dehydrogenase related protein                                                                                                    |
| EPL_15243_0671 | hypothetical protein                                                                                                                                      |
| EPL_15243_0670 | hypothetical protein                                                                                                                                      |
| EPL_15243_0669 | hemH; phosphoribosylaminoimidazole-succinocarboxamide synthase (EC:6.3.2.6); K01923 phosphoribosylaminoimidazole-succinocarboxamide synthase [EC:6.3.2.6] |
| EPL_15243_0649 | hypothetical protein                                                                                                                                      |
| EPL_15243_0647 | Oxidoreductase, zinc-binding                                                                                                                              |
| EPL_15243_0643 | malate synthase; K01638 malate synthase [EC:2.3.3.9]                                                                                                      |
| EPL_15243_0634 | putative alcohol dehydrogenase; K00001 alcohol dehydrogenase [EC:1.1.1.1]                                                                                 |
| EPL_15243_0626 | indolepyruvate ferredoxin oxidoreductase, alpha subunit; K00179 indolepyruvate ferredoxin oxidoreductase, alpha                                           |

|                |                                                                                                                                                            |
|----------------|------------------------------------------------------------------------------------------------------------------------------------------------------------|
|                | subunit [EC:1.2.7.8]                                                                                                                                       |
| EPL_15243_0623 | pyridoxal biosynthesis lyase PdxS; K06215 pyridoxine biosynthesis protein [EC:4.-.-]                                                                       |
| EPL_15243_0619 | HTH DNA-binding protein                                                                                                                                    |
| EPL_15243_0618 | peptidyl-prolyl cis-trans isomerase (EC:5.2.1.8); K01802 peptidylprolyl isomerase [EC:5.2.1.8]                                                             |
| EPL_15243_0615 | type II secretion system protein E                                                                                                                         |
| EPL_15243_0613 | type II secretion system F domain protein                                                                                                                  |
| EPL_15243_0608 | glucose-1-dehydrogenase (EC:1.1.1.47); K00034 glucose 1-dehydrogenase [EC:1.1.1.47]                                                                        |
| EPL_15243_0607 | glucose 1-dehydrogenase; K00034 glucose 1-dehydrogenase [EC:1.1.1.47]                                                                                      |
| EPL_15243_0597 | regulatory protein MoxR related protein; K03924 MoxR-like ATPase [EC:3.6.3.-]                                                                              |
| EPL_15243_0595 | hypothetical protein                                                                                                                                       |
| EPL_15243_0592 | exosome complex RNA-binding protein Csl4; K07573 exosome complex component CSL4                                                                            |
| EPL_15243_0590 | small nuclear ribonucleoprotein (snRNP)-like protein                                                                                                       |
| EPL_15243_0586 | dihydroorotate dehydrogenase (EC:1.3.3.1); K00226 dihydroorotate oxidase [EC:1.3.3.1]                                                                      |
| EPL_15243_0583 | DNA-directed RNA polymerase subunit L (EC:2.7.7.6); K03056 DNA-directed RNA polymerase subunit L [EC:2.7.7.6]                                              |
| EPL_15243_0580 | molecular chaperone (small heat shock protein, HSP20-related)                                                                                              |
| EPL_15243_0577 | sulfide dehydrogenase related protein                                                                                                                      |
| EPL_15243_0576 | hypothetical protein                                                                                                                                       |
| EPL_15243_0575 | OsmC-like protein; K07397 putative redox protein                                                                                                           |
| EPL_15243_0573 | fusA; elongation factor EF-2; K03234 elongation factor EF-2 [EC:3.6.5.3]                                                                                   |
| EPL_15243_0572 | rps10p; 30S ribosomal protein S10P; K02946 small subunit ribosomal protein S10                                                                             |
| EPL_15243_0571 | ef1a, tuf; elongation factor 1-alpha (EC:3.6.5.3); K03231 elongation factor EF-1 alpha subunit [EC:3.6.5.3]                                                |
| EPL_15243_0569 | hypothetical protein                                                                                                                                       |
| EPL_15243_0568 | bifunctional phosphoglucose/phosphomannose isomerase; K01809 mannose-6-phosphate isomerase [EC:5.3.1.8]; K01810 glucose-6-phosphate isomerase [EC:5.3.1.9] |
| EPL_15243_0541 | pyruvate kinase (EC:2.7.1.40); K00873 pyruvate kinase [EC:2.7.1.40]                                                                                        |
| EPL_15243_0538 | potassium channel protein                                                                                                                                  |
| EPL_15243_0534 | rps9p; 30S ribosomal protein S9P; K02996 small subunit ribosomal protein S9                                                                                |
| EPL_15243_0533 | rpl13p; 50S ribosomal protein L13P; K02871 large subunit ribosomal protein L13                                                                             |
| EPL_15243_0532 | 50S ribosomal protein L18e; K02883 large subunit ribosomal protein L18e                                                                                    |
| EPL_15243_0531 | rRNA methylase                                                                                                                                             |
| EPL_15243_0530 | FKBP-type peptidyl-prolyl cis-trans isomerase; K01802 peptidylprolyl isomerase [EC:5.2.1.8]                                                                |

|                |                                                                                                                  |
|----------------|------------------------------------------------------------------------------------------------------------------|
| EPL_15243_0528 | hypothetical protein; K01720 2-methylcitrate dehydratase [EC:4.2.1.79]                                           |
| EPL_15243_0527 | carboxyphosphoenolpyruvate phosphonmutase; K01003 carboxyvinyl-carboxyphosphonate phosphorylmutase [EC:2.7.8.23] |
| EPL_15243_0526 | citA; citrate synthase I (EC:2.3.3.1); K01647 citrate synthase [EC:2.3.3.1]                                      |
| EPL_15243_0524 | ppnK; inorganic polyphosphate/ATP-NAD kinase (EC:2.7.1.23); K00858 NAD+ kinase [EC:2.7.1.23]                     |
| EPL_15243_0520 | DNA-directed RNA polymerase subunit D (EC:2.7.7.6); K03047 DNA-directed RNA polymerase subunit D [EC:2.7.7.6]    |
| EPL_15243_0519 | rps11p; 30S ribosomal protein S11P; K02948 small subunit ribosomal protein S11                                   |
| EPL_15243_0518 | rps4p; 30S ribosomal protein S4P; K02986 small subunit ribosomal protein S4                                      |
| EPL_15243_0517 | rps13p; 30S ribosomal protein S13P; K02952 small subunit ribosomal protein S13                                   |
| EPL_15243_0514 | otsB; trehalose-6-phosphatase; K01087 trehalose-phosphatase [EC:3.1.3.12]                                        |
| EPL_15243_0508 | Putative uncharacterized protein                                                                                 |
| EPL_15243_0501 | DNA-directed RNA polymerase subunit A" (EC:2.7.7.6); K03042 DNA-directed RNA polymerase subunit A" [EC:2.7.7.6]  |
| EPL_15243_0500 | DNA-directed RNA polymerase subunit A' (EC:2.7.7.6); K03041 DNA-directed RNA polymerase subunit A' [EC:2.7.7.6]  |
| EPL_15243_0499 | DNA-directed RNA polymerase subunit B (EC:2.7.7.6); K13798 DNA-directed RNA polymerase subunit B [EC:2.7.7.6]    |
| EPL_15243_0466 | rpl6p; 50S ribosomal protein L6P; K02933 large subunit ribosomal protein L6                                      |
| EPL_15243_0465 | rps8p; 30S ribosomal protein S8P; K02994 small subunit ribosomal protein S8                                      |
| EPL_15243_0464 | rpl5p; 50S ribosomal protein L5P; K02931 large subunit ribosomal protein L5                                      |
| EPL_15243_0463 | 30S ribosomal protein S4e; K02987 small subunit ribosomal protein S4e                                            |
| EPL_15243_0462 | rpl24p; 50S ribosomal protein L24P; K02895 large subunit ribosomal protein L24                                   |
| EPL_15243_0461 | rpl14p; 50S ribosomal protein L14P; K02874 large subunit ribosomal protein L14                                   |
| EPL_15243_0456 | rps3p; 30S ribosomal protein S3P; K02982 small subunit ribosomal protein S3                                      |
| EPL_15243_0455 | rpl22p; 50S ribosomal protein L22P; K02890 large subunit ribosomal protein L22                                   |
| EPL_15243_0454 | rps19p; 30S ribosomal protein S19P; K02965 small subunit ribosomal protein S19                                   |
| EPL_15243_0453 | rpl2p; 50S ribosomal protein L2P; K02886 large subunit ribosomal protein L2                                      |
| EPL_15243_0452 | rplW; 50S ribosomal protein L23P; K02892 large subunit ribosomal protein L23                                     |
| EPL_15243_0451 | rpl4lp; 50S ribosomal protein L4P; K02930 large subunit ribosomal protein L4e                                    |
| EPL_15243_0450 | rpl3p; 50S ribosomal protein L3P; K02906 large subunit ribosomal protein L3                                      |
| EPL_15243_0444 | acetyl-CoA synthetase (ADP forming), beta chain (AcdB)                                                           |
| EPL_15243_0442 | triosephosphate isomerase (EC:5.3.1.1); K01803 triosephosphate isomerase (TIM) [EC:5.3.1.1]                      |

|                |                                                                                                                 |
|----------------|-----------------------------------------------------------------------------------------------------------------|
| EPL_15243_0439 | hutH; histidine ammonia-lyase (EC:4.3.1.3); K01745 histidine ammonia-lyase [EC:4.3.1.3]                         |
| EPL_15243_0438 | Acyl-CoA synthetase                                                                                             |
| EPL_15243_0437 | thrS; threonyl-tRNA synthetase (EC:6.1.1.3); K01868 threonyl-tRNA synthetase [EC:6.1.1.3]                       |
| EPL_15243_0436 | electron transfer flavoprotein subunit alpha; K03522 electron transfer flavoprotein alpha subunit               |
| EPL_15243_0435 | electron transfer flavoprotein subunit beta; K03521 electron transfer flavoprotein beta subunit                 |
| EPL_15243_0433 | dehydrogenase (flavoprotein); K00313 electron transfer flavoprotein-quinone oxidoreductase [EC:1.5.5.-]         |
| EPL_15243_0432 | spermidine synthase (EC:2.5.1.16); K00797 spermidine synthase [EC:2.5.1.16]                                     |
| EPL_15243_0427 | translation initiation factor IF-2 subunit gamma; K03242 translation initiation factor eIF-2 gamma subunit      |
| EPL_15243_0425 | nucleoid DNA-binding protein (HB-related)                                                                       |
| EPL_15243_0424 | hypothetical protein                                                                                            |
| EPL_15243_0423 | hypothetical protein; K01151 deoxyribonuclease IV [EC:3.1.21.2]                                                 |
| EPL_15243_0421 | DNA primase                                                                                                     |
| EPL_15243_0420 | hypothetical protein; K01338 ATP-dependent Lon protease [EC:3.4.21.53]                                          |
| EPL_15243_0418 | putative peroxiredoxin (EC:1.11.1.15)                                                                           |
| EPL_15243_0413 | hypothetical protein                                                                                            |
| EPL_15243_0403 | NADH dehydrogenase subunit D (EC:1.6.5.3); K00333 NADH dehydrogenase I subunit D [EC:1.6.5.3]                   |
| EPL_15243_0396 | acyl-CoA dehydrogenase, short-chain specific (EC:1.3.99.2); K00248 butyryl-CoA dehydrogenase [EC:1.3.99.2]      |
| EPL_15243_0391 | hypothetical protein                                                                                            |
| EPL_15243_0388 | NAD-dependent aldehyde dehydrogenase; K00128 aldehyde dehydrogenase (NAD+) [EC:1.2.1.3]                         |
| EPL_15243_0386 | DNA/RNA-binding protein Alba; K03622 archaea-specific DNA-binding protein                                       |
| EPL_15243_0377 | aldehyde dehydrogenase; K07248 lactaldehyde dehydrogenase / glycolaldehyde dehydrogenase [EC:1.2.1.22 1.2.1.21] |
| EPL_15243_0376 | hypothetical protein                                                                                            |
| EPL_15243_0363 | hypothetical protein                                                                                            |
| EPL_15243_0357 | hypothetical protein                                                                                            |
| EPL_15243_0351 | glycine dehydrogenase subunit 1 (EC:1.4.4.2); K00282 glycine dehydrogenase subunit 1 [EC:1.4.4.2]               |
| EPL_15243_0350 | glycine dehydrogenase subunit 2 (EC:1.4.4.2); K00283 glycine dehydrogenase subunit 2 [EC:1.4.4.2]               |
| EPL_15243_0348 | hypothetical protein; K09746 hypothetical protein                                                               |
| EPL_15243_0347 | replication factor A; K07466 replication factor A1                                                              |
| EPL_15243_0340 | hypothetical protein                                                                                            |
| EPL_15243_0335 | aminopeptidase N; K13722 tricorn protease interacting factor F2/3 [EC:3.4.11.-]                                 |
| EPL_15243_0334 | CBS domain-containing protein                                                                                   |

|                |                                                                                                                  |
|----------------|------------------------------------------------------------------------------------------------------------------|
| EPL_15243_0333 | glycine hydroxymethyltransferase related protein; K00600 glycine hydroxymethyltransferase [EC:2.1.2.1]           |
| EPL_15243_0319 | hypothetical protein                                                                                             |
| EPL_15243_0317 | Fe <sup>2+</sup> uptake regulation protein; K03711 Fur family transcriptional regulator, ferric uptake regulator |
| EPL_15243_0306 | alcohol dehydrogenase related protein                                                                            |
| EPL_15243_0304 | TPR repeat-containing protein                                                                                    |
| EPL_15243_0296 | mannose-1-phosphate guanyltransferase related protein                                                            |
| EPL_15243_0295 | 2-amino-3-ketobutyrate coenzyme A ligase (EC:2.3.1.29); K00639 glycine C-acetyltransferase [EC:2.3.1.29]         |
| EPL_15243_0294 | NAD-dependent epimerase/dehydratase                                                                              |
| EPL_15243_0291 | geranylgeranyl reductase                                                                                         |
| EPL_15243_0285 | pyruvate phosphate dikinase (EC:2.7.9.1); K01006 pyruvate, orthophosphate dikinase [EC:2.7.9.1]                  |
| EPL_15243_0275 | hypothetical protein                                                                                             |
| EPL_15243_0267 | leucyl aminopeptidase (EC:3.4.11.1); K01255 leucyl aminopeptidase [EC:3.4.11.1]                                  |
| EPL_15243_0261 | RPL15; 50S ribosomal protein L15e; K02877 large subunit ribosomal protein L15e                                   |
| EPL_15243_0256 | hypothetical protein                                                                                             |
| EPL_15243_0255 | chaperonin GroEL                                                                                                 |
| EPL_15243_0253 | acyl-CoA dehydrogenase; K00249 acyl-CoA dehydrogenase [EC:1.3.99.3]                                              |
| EPL_15243_0249 | inorganic pyrophosphatase; K01507 inorganic pyrophosphatase [EC:3.6.1.1]                                         |
| EPL_15243_0239 | acetyl-coenzyme-A synthetase; K01895 acetyl-CoA synthetase [EC:6.2.1.1]                                          |
| EPL_15243_0235 | hypothetical protein                                                                                             |
| EPL_15243_0231 | prefoldin subunit alpha                                                                                          |
| EPL_15243_0230 | pgk; phosphoglycerate kinase (EC:2.7.2.3); K00927 phosphoglycerate kinase [EC:2.7.2.3]                           |
| EPL_15243_0224 | carbamate kinase (EC:2.7.2.2); K00926 carbamate kinase [EC:2.7.2.2]                                              |
| EPL_15243_0213 | putative deoxyhypusine synthase (EC:2.5.1.46); K00809 deoxyhypusine synthase [EC:2.5.1.46]                       |
| EPL_15243_0207 | long-chain-fatty-acid--CoA ligase (EC:6.2.1.3)                                                                   |
| EPL_15243_0205 | hypothetical protein                                                                                             |
| EPL_15243_0204 | hypothetical protein; K07068                                                                                     |
| EPL_15243_0203 | AMP-dependent synthetase and ligase; K01897 long-chain acyl-CoA synthetase [EC:6.2.1.3]                          |
| EPL_15243_0198 | hypothetical protein                                                                                             |
| EPL_15243_0194 | 30S ribosomal protein S7P; K02992 small subunit ribosomal protein S7                                             |
| EPL_15243_0193 | rps12P; 30S ribosomal protein S12P; K02950 small subunit ribosomal protein S12                                   |
| EPL_15243_0180 | acyl-CoA synthetase related protein                                                                              |
| EPL_15243_0179 | acyl-CoA dehydrogenase related protein                                                                           |



|                |                                                                                                                                          |
|----------------|------------------------------------------------------------------------------------------------------------------------------------------|
| EPL_15243_0158 | hypothetical protein                                                                                                                     |
| EPL_15243_0157 | CRISPR-associated protein                                                                                                                |
| EPL_15243_0156 | hypothetical protein                                                                                                                     |
| EPL_15243_0155 | hypothetical protein                                                                                                                     |
| EPL_15243_0146 | CRISPR-associated protein Csc2                                                                                                           |
| EPL_15243_0145 | hypothetical protein                                                                                                                     |
| EPL_15243_0131 | aspA; aspartate ammonia-lyase (EC:4.3.1.1); K01679 fumarate hydratase, class II [EC:4.2.1.2]                                             |
| EPL_15243_0130 | pyruvate ferredoxin oxidoreductase, alpha chain (EC:1.2.7.1); K00174 2-oxoglutarate ferredoxin oxidoreductase subunit alpha [EC:1.2.7.3] |
| EPL_15243_0129 | 2-oxoacid ferredoxin oxidoreductase subunit beta (EC:1.2.7.1); K00175 2-oxoglutarate ferredoxin oxidoreductase subunit beta [EC:1.2.7.3] |
| EPL_15243_0126 | ABC-type peptide transport system, solute-binding component                                                                              |
| EPL_15243_0118 | ABC-type peptide transporter, ATPase component; K02032 peptide/nickel transport system ATP-binding protein                               |
| EPL_15243_0117 | ABC-type peptide transport system, ATPase component                                                                                      |
| EPL_15243_0114 | rpl12p; 50S ribosomal protein L12P; K02869 large subunit ribosomal protein L12                                                           |
| EPL_15243_0113 | rplP0; acidic ribosomal protein P0; K02864 large subunit ribosomal protein L10                                                           |
| EPL_15243_0112 | rpl1P; 50S ribosomal protein L1P; K02863 large subunit ribosomal protein L1                                                              |
| EPL_15243_0111 | rpl11p; 50S ribosomal protein L11P; K02867 large subunit ribosomal protein L11                                                           |
| EPL_15243_0107 | hypothetical protein                                                                                                                     |
| EPL_15243_0106 | hypothetical protein                                                                                                                     |
| EPL_15243_0105 | acetyl-CoA acetyltransferase (EC:2.3.1.9); K00626 acetyl-CoA C-acetyltransferase [EC:2.3.1.9]                                            |
| EPL_15243_0104 | nucleic-acid-binding protein; K07068                                                                                                     |
| EPL_15243_0103 | peroxiredoxin; K03564 peroxiredoxin Q/BCP [EC:1.11.1.15]                                                                                 |
| EPL_15243_0101 | putative RNA-binding protein; K07575 PUA domain protein                                                                                  |
| EPL_15243_0100 | hypothetical protein                                                                                                                     |
| EPL_15243_0099 | nusG; transcription antitermination protein NusG; K02601 transcriptional antiterminator NusG                                             |
| EPL_15243_0097 | rpoK; DNA-directed RNA polymerase subunit K (EC:2.7.7.6); K03055 DNA-directed RNA polymerase subunit K [EC:2.7.7.6]                      |
| EPL_15243_0095 | lysK; lysyl-tRNA synthetase (EC:6.1.1.6); K04566 lysyl-tRNA synthetase, class I [EC:6.1.1.6]                                             |
| EPL_15243_0092 | chromosome partitioning ATPase; K03593 ATP-binding protein involved in chromosome partitioning                                           |
| EPL_15243_0086 | phosphoribosylaminoimidazole synthetase (EC:6.3.3.1); K01933 phosphoribosylformylglycinamide cyclo-ligase [EC:6.3.3.1]                   |
| EPL_15243_0069 | phosphate uptake regulator                                                                                                               |

|                |                                                                                                                                                                                                                                    |
|----------------|------------------------------------------------------------------------------------------------------------------------------------------------------------------------------------------------------------------------------------|
| EPL_15243_0068 | metal dependent hydrolase (EC:3.-.-.-); K01567 [EC:3.-.-.-]                                                                                                                                                                        |
| EPL_15243_0067 | S-adenosylmethionine synthetase (EC:2.5.1.6); K00789 S-adenosylmethionine synthetase [EC:2.5.1.6]                                                                                                                                  |
| EPL_15243_0066 | purH; bifunctional phosphoribosylaminoimidazolecarboxamide formyltransferase/IMP cyclohydrolase (EC:3.5.4.10 2.1.2.3); K00602 phosphoribosylaminoimidazolecarboxamide formyltransferase / IMP cyclohydrolase [EC:2.1.2.3 3.5.4.10] |
| EPL_15243_0064 | DNA topoisomerase I (EC:5.99.1.2); K03168 DNA topoisomerase I [EC:5.99.1.2]                                                                                                                                                        |
| EPL_15243_0061 | hypothetical protein                                                                                                                                                                                                               |
| EPL_15243_0060 | L-3-hydroxyacyl-CoA dehydrogenase precursor related protein                                                                                                                                                                        |
| EPL_15243_0058 | ABC transporter related protein                                                                                                                                                                                                    |
| EPL_15243_0051 | mercuric reductase (EC:1.16.1.1); K00520 mercuric reductase [EC:1.16.1.1]                                                                                                                                                          |
| EPL_15243_0045 | metallo-beta-lactamase family protein                                                                                                                                                                                              |
| EPL_15243_0044 | alkyl hydroperoxide reductase subunit f related protein                                                                                                                                                                            |
| EPL_15243_0039 | formiminotransferase cyclodeaminase related protein                                                                                                                                                                                |
| EPL_15243_0038 | glutamate formiminotransferase; K01746 formiminotetrahydrofolate cyclodeaminase [EC:4.3.1.4]                                                                                                                                       |
| EPL_15243_0037 | ribonucleotide-diphosphate reductase subunit alpha (EC:1.17.4.1); K00525 ribonucleoside-diphosphate reductase alpha chain [EC:1.17.4.1]                                                                                            |
| EPL_15243_0030 | predicted succinyl-CoA:3-ketoacid-CoA ligase                                                                                                                                                                                       |
| EPL_15243_0021 | hypothetical protein                                                                                                                                                                                                               |
| EPL_15243_0018 | 2-methylcitrate synthase/citrate synthase II (EC:2.3.3.1); K01647 citrate synthase [EC:2.3.3.1]                                                                                                                                    |
| EPL_15243_0014 | glutamine synthetase; K01915 glutamine synthetase [EC:6.3.1.2]                                                                                                                                                                     |
| EPL_15243_0012 | metal-binding protein containing                                                                                                                                                                                                   |
| EPL_12876_0003 | transferase hexapeptide domain protein                                                                                                                                                                                             |
| ARMAN5:or1105  | Arginyl-tRNA synthetase (Fragment)                                                                                                                                                                                                 |
| ARMAN5:or1100  | Putative uncharacterized protein (Fragment)                                                                                                                                                                                        |
| ARMAN5:or1083  | fusA; elongation factor EF-2; K03234 elongation factor EF-2 [EC:3.6.5.3]                                                                                                                                                           |
| ARMAN5:or1073  | Putative uncharacterized protein                                                                                                                                                                                                   |
| ARMAN5:or1053  | Sulfatase                                                                                                                                                                                                                          |
| ARMAN5:or1046  | Heat shock protein Hsp20                                                                                                                                                                                                           |
| ARMAN5:or1045  | Putative uncharacterized protein                                                                                                                                                                                                   |
| ARMAN5:or1025  | Heavy metal translocating P-type ATPase                                                                                                                                                                                            |
| ARMAN5:or1022  | aconitate hydratase; K01681 aconitate hydratase 1 [EC:4.2.1.3]                                                                                                                                                                     |
| ARMAN5:or0993  | Translation initiation factor 2, alpha subunit                                                                                                                                                                                     |

|                |                                                                                                                        |
|----------------|------------------------------------------------------------------------------------------------------------------------|
| ARMAN5:or0991a | Pyruvate flavodoxin/ferredoxin oxidoreductase domain protein                                                           |
| ARMAN5:or0990a | trxA; TrxA protein; K03671 thioredoxin 1                                                                               |
| ARMAN5:or0988  | Methionine adenosyltransferase                                                                                         |
| ARMAN5:or0951  | H <sup>+</sup> -transporting two-sector ATPase alpha/beta subunit domain protein                                       |
| ARMAN5:or0944  | AAA family ATPase, CDC48 subfamily                                                                                     |
| ARMAN5:or0937  | Isoleucyl-tRNA synthetase                                                                                              |
| ARMAN5:or0935  | transcription factor; K03120 transcription initiation factor TFIID TATA-box-binding protein                            |
| ARMAN5:or0915  | Proliferating cell nuclear antigen PcnA                                                                                |
| ARMAN5:or0910  | Putative uncharacterized protein                                                                                       |
| ARMAN5:or0886  | top6A; DNA topoisomerase VI subunit A (EC:5.99.1.3); K03166 DNA topoisomerase VI subunit A [EC:5.99.1.3]               |
| ARMAN5:or0859  | Putative uncharacterized protein                                                                                       |
| ARMAN5:or0857  | Chaperone protein DnaK                                                                                                 |
| ARMAN5:or0843  | Aspartate/glutamate/uridylate kinase                                                                                   |
| ARMAN5:or0825  | V-type ATPase 116 kDa subunit                                                                                          |
| ARMAN5:or0822  | V-type ATP synthase subunit B (EC:3.6.3.14); K02118 V-type H <sup>+</sup> -transporting ATPase subunit B [EC:3.6.3.14] |
| ARMAN5:or0821  | ATP synthase, A subunit (EC:3.6.3.14); K02117 V-type H <sup>+</sup> -transporting ATPase subunit A [EC:3.6.3.14]       |
| ARMAN5:or0815  | Superoxide dismutase                                                                                                   |
| ARMAN5:or0795  | Proteasome endopeptidase complex                                                                                       |
| ARMAN5:or0785  | Asparagine synthase                                                                                                    |
| ARMAN5:or0764  | Putative uncharacterized protein                                                                                       |
| ARMAN5:or0761  | PrkA AAA domain protein                                                                                                |
| ARMAN5:or0755  | putative RNA-processing protein; K06961                                                                                |
| ARMAN5:or0731  | Putative uncharacterized protein                                                                                       |
| ARMAN5:or0728  | Putative uncharacterized protein                                                                                       |
| ARMAN5:or0714  | Putative uncharacterized protein                                                                                       |
| ARMAN5:or0708  | Elongation factor Tu domain protein (Fragment)                                                                         |
| ARMAN5:or0679  | KH type 2 domain protein                                                                                               |
| ARMAN5:or0668  | Transcriptional regulator TrmB                                                                                         |
| ARMAN5:or0663  | ATP-dependent protease; K13525 transitional endoplasmic reticulum ATPase                                               |
| ARMAN5:or0656  | H <sup>+</sup> -transporting two-sector ATPase alpha/beta subunit central region                                       |
| ARMAN5:or0655  | V-type ATP synthase subunit B (EC:3.6.3.14); K02118 V-type H <sup>+</sup> -transporting ATPase subunit B [EC:3.6.3.14] |
| ARMAN5:or0652  | V-type ATP synthase subunit I (EC:3.6.3.14); K02123 V-type H <sup>+</sup> -transporting ATPase subunit I [EC:3.6.3.14] |

|               |                                                                                        |
|---------------|----------------------------------------------------------------------------------------|
| ARMAN5:or0649 | hypothetical protein                                                                   |
| ARMAN5:or0648 | ATP-dependent protease Lon; K04076 Lon-like ATP-dependent protease [EC:3.4.21.-]       |
| ARMAN5:or0597 | Succinate dehydrogenase                                                                |
| ARMAN5:or0590 | Pyruvate flavodoxin/ferredoxin oxidoreductase domain protein                           |
| ARMAN5:or0520 | TOPRIM domain protein                                                                  |
| ARMAN5:or0513 | cation transport ATPase; K01533 Cu <sup>2+</sup> -exporting ATPase [EC:3.6.3.4]        |
| ARMAN5:or0510 | Aconitate hydratase 1                                                                  |
| ARMAN5:or0502 | GatB-like protein                                                                      |
| ARMAN5:or0483 | cell division protein FtsZ; K03531 cell division protein FtsZ                          |
| ARMAN5:or0475 | Zinc-binding alcohol dehydrogenase family protein                                      |
| ARMAN5:or0472 | Putative uncharacterized protein                                                       |
| ARMAN5:or0461 | Beta-lactamase domain protein                                                          |
| ARMAN5:or0439 | rpl12p; 50S ribosomal protein L12P; K02869 large subunit ribosomal protein L12         |
| ARMAN5:or0434 | Fructose-bisphosphate aldolase                                                         |
| ARMAN5:or0432 | Putative uncharacterized protein                                                       |
| ARMAN5:or0421 | ribosomal protein S27E                                                                 |
| ARMAN5:or0414 | ArsR family transcriptional regulator                                                  |
| ARMAN5:or0405 | DNA repair and recombination protein RadA                                              |
| ARMAN5:or0373 | Putative uncharacterized protein                                                       |
| ARMAN5:or0349 | Phosphoadenosine phosphosulfate reductase                                              |
| ARMAN5:or0346 | Putative uncharacterized protein                                                       |
| ARMAN5:or0342 | hypothetical protein                                                                   |
| ARMAN5:or0341 | Chaperonin Cpn60/TCP-1                                                                 |
| ARMAN5:or0297 | tfb; transcription initiation factor IIB; K03124 transcription initiation factor TFIIB |
| ARMAN5:or0291 | Nucleoside diphosphate kinase                                                          |
| ARMAN5:or0288 | Selenocysteine-specific translation elongation factor-like protein                     |
| ARMAN5:or0277 | DNA polymerase II, large subunit DP2                                                   |
| ARMAN5:or0276 | CBS domain containing protein                                                          |
| ARMAN5:or0255 | Glucose-6-phosphate isomerase                                                          |
| ARMAN5:or0223 | Deoxyribose-phosphate aldolase                                                         |
| ARMAN5:or0160 | Putative uncharacterized protein                                                       |
| ARMAN5:or0147 | fusA; elongation factor EF-2; K03234 elongation factor EF-2 [EC:3.6.5.3]               |

|               |                                                                                             |
|---------------|---------------------------------------------------------------------------------------------|
| ARMAN5:or0132 | Serine protease-like protein                                                                |
| ARMAN5:or0130 | glycyl-tRNA synthetase (EC:6.1.1.14); K01880 glycyl-tRNA synthetase [EC:6.1.1.14]           |
| ARMAN5:or0111 | RNA polymerase Rpb7 domain protein                                                          |
| ARMAN5:or0104 | Regulatory protein ArsR                                                                     |
| ARMAN5:or0053 | aspC; aspartyl-tRNA synthetase (EC:6.1.1.12); K01876 aspartyl-tRNA synthetase [EC:6.1.1.12] |
| ARMAN5:or0016 | tRNA synthetase valyl/leucyl anticodon-binding                                              |
| ARMAN4:or1007 | CRISPR-associated protein (Fragment)                                                        |
| ARMAN4:or0984 | Glycine hydroxymethyltransferase                                                            |
| ARMAN4:or0956 | TATA-box binding family protein                                                             |
| ARMAN4:or0951 | CBS domain containing membrane protein                                                      |
| ARMAN4:or0947 | Elongation factor 1-alpha                                                                   |
| ARMAN4:or0945 | Transposase, IS605 OrfB family                                                              |
| ARMAN4:or0929 | hypothetical protein                                                                        |
| ARMAN4:or0926 | Aminoacyl-tRNA synthetase class Ia                                                          |
| ARMAN4:or0920 | Putative circadian clock protein, KaiC                                                      |
| ARMAN4:or0919 | Putative uncharacterized protein                                                            |
| ARMAN4:or0895 | putative NADPH:quinone oxidoreductase                                                       |
| ARMAN4:or0876 | Putative uncharacterized protein                                                            |
| ARMAN4:or0871 | Putative uncharacterized protein                                                            |
| ARMAN4:or0868 | Putative uncharacterized protein                                                            |
| ARMAN4:or0838 | hypothetical protein; K07133                                                                |
| ARMAN4:or0835 | Peptidase S16, Lon protease                                                                 |
| ARMAN4:or0834 | hypothetical protein                                                                        |
| ARMAN4:or0833 | Acyl-CoA synthetase (NDP forming)-like protein                                              |
| ARMAN4:or0776 | Putative uncharacterized protein                                                            |
| ARMAN4:or0767 | Ribosomal protein L3                                                                        |
| ARMAN4:or0761 | non-phosphorylating glyceraldehyde-3-phosphate dehydrogenase (GAPN) (EC:1.2.1.9)            |
| ARMAN4:or0755 | Proteasome endopeptidase complex                                                            |
| ARMAN4:or0753 | KH type 1 domain protein                                                                    |
| ARMAN4:or0751 | Putative uncharacterized protein                                                            |
| ARMAN4:or0728 | Putative uncharacterized protein                                                            |
| ARMAN4:or0709 | rps5p; 30S ribosomal protein S5P; K02988 small subunit ribosomal protein S5                 |

|               |                                                                                                                                                     |
|---------------|-----------------------------------------------------------------------------------------------------------------------------------------------------|
| ARMAN4:or0706 | Elongation factor G domain IV                                                                                                                       |
| ARMAN4:or0700 | Metallophosphoesterase                                                                                                                              |
| ARMAN4:or0692 | RNA polymerase beta subunit                                                                                                                         |
| ARMAN4:or0691 | RNA polymerase Rpb2 domain 6                                                                                                                        |
| ARMAN4:or0690 | RNA polymerase Rpb1 domain 1                                                                                                                        |
| ARMAN4:or0687 | RNA polymerase Rpb1 domain 4                                                                                                                        |
| ARMAN4:or0686 | RNA polymerase Rpb1 domain 5                                                                                                                        |
| ARMAN4:or0662 | Small GTP-binding protein                                                                                                                           |
| ARMAN4:or0648 | Deoxyhypusine synthase                                                                                                                              |
| ARMAN4:or0599 | Seryl-tRNA synthetase                                                                                                                               |
| ARMAN4:or0592 | DNA polymerase sliding clamp                                                                                                                        |
| ARMAN4:or0587 | Putative uncharacterized protein                                                                                                                    |
| ARMAN4:or0570 | Succinate dehydrogenase                                                                                                                             |
| ARMAN4:or0563 | pyruvate flavodoxin/ferredoxin oxidoreductase domain-containing protein; K00174 2-oxoglutarate ferredoxin oxidoreductase subunit alpha [EC:1.2.7.3] |
| ARMAN4:or0562 | trxA; TrxA protein; K03671 thioredoxin 1                                                                                                            |
| ARMAN4:or0556 | Succinate--CoA ligase (ADP-forming)                                                                                                                 |
| ARMAN4:or0551 | TOPRIM domain protein                                                                                                                               |
| ARMAN4:or0543 | Nucleotidyl transferase                                                                                                                             |
| ARMAN4:or0536 | Aconitate hydratase 1                                                                                                                               |
| ARMAN4:or0513 | transcriptional regulator, XRE family; K10726 replicative DNA helicase Mcm [EC:3.6.1.-]                                                             |
| ARMAN4:or0509 | rps10p; 30S ribosomal protein S10P; K02946 small subunit ribosomal protein S10                                                                      |
| ARMAN4:or0508 | rpl7ae; 50S ribosomal protein L7Ae; K02936 large subunit ribosomal protein L7Ae                                                                     |
| ARMAN4:or0507 | rps28e; 30S ribosomal protein S28e; K02979 small subunit ribosomal protein S28e                                                                     |
| ARMAN4:or0504 | Putative uncharacterized protein                                                                                                                    |
| ARMAN4:or0501 | Putative uncharacterized protein                                                                                                                    |
| ARMAN4:or0495 | Phosphoenolpyruvate synthase                                                                                                                        |
| ARMAN4:or0489 | Nucleotidyl transferase                                                                                                                             |
| ARMAN4:or0449 | Cell division protein ftsZ                                                                                                                          |
| ARMAN4:or0395 | aspC; aspartyl-tRNA synthetase (EC:6.1.1.12); K01876 aspartyl-tRNA synthetase [EC:6.1.1.12]                                                         |
| ARMAN4:or0391 | Putative uncharacterized protein                                                                                                                    |
| ARMAN4:or0379 | Phosphoglycerate mutase 1 family                                                                                                                    |

|               |                                                                                         |
|---------------|-----------------------------------------------------------------------------------------|
| ARMAN4:or0360 | DNA repair and recombination protein RadA                                               |
| ARMAN4:or0327 | Transcriptional regulator, ArsR family                                                  |
| ARMAN4:or0315 | Ribosomal protein L10                                                                   |
| ARMAN4:or0314 | rpl12p; 50S ribosomal protein L12P; K02869 large subunit ribosomal protein L12          |
| ARMAN4:or0308 | Fructose-bisphosphate aldolase 1                                                        |
| ARMAN4:or0288 | Alkyl hydroperoxide reductase/ Thiol specific antioxidant/ Mal allergen                 |
| ARMAN4:or0283 | aspA; aspartate ammonia-lyase (EC:4.3.1.1); K01744 aspartate ammonia-lyase [EC:4.3.1.1] |
| ARMAN4:or0277 | Beta-lactamase domain protein                                                           |
| ARMAN4:or0252 | FAD-dependent pyridine nucleotide-disulphide oxidoreductase                             |
| ARMAN4:or0249 | Serine protease-like protein                                                            |
| ARMAN4:or0245 | Beta-lactamase domain protein                                                           |
| ARMAN4:or0234 | Translation elongation factor aEF-2                                                     |
| ARMAN4:or0224 | Putative uncharacterized protein                                                        |
| ARMAN4:or0219 | Putative uncharacterized protein                                                        |
| ARMAN4:or0210 | Glycosyl transferase group 1                                                            |
| ARMAN4:or0201 | Putative methyl-accepting chemotaxis sensory transducer                                 |
| ARMAN4:or0186 | Lysyl-tRNA synthetase                                                                   |
| ARMAN4:or0182 | Phosphoadenosine phosphosulfate reductase                                               |
| ARMAN4:or0178 | like-Sm ribonucleoprotein core; K04796 small nuclear ribonucleoprotein                  |
| ARMAN4:or0177 | Thermosome                                                                              |
| ARMAN4:or0159 | Putative uncharacterized protein                                                        |
| ARMAN4:or0143 | Type III restriction protein res subunit                                                |
| ARMAN4:or0137 | Putative uncharacterized protein                                                        |
| ARMAN4:or0136 | Putative uncharacterized protein                                                        |
| ARMAN4:or0132 | Transcription factor TFIIIB cyclin-related protein                                      |
| ARMAN4:or0124 | Selenocysteine-specific translation elongation factor-like protein                      |
| ARMAN4:or0109 | Putative uncharacterized protein                                                        |
| ARMAN4:or0108 | KH type 2 domain protein                                                                |
| ARMAN4:or0107 | 50S ribosomal protein L22P                                                              |
| ARMAN4:or0098 | Transcriptional regulator, TrmB                                                         |
| ARMAN4:or0093 | Microtubule-severing ATPase                                                             |
| ARMAN4:or0086 | H <sup>+</sup> transporting two-sector ATPase alpha/beta subunit central region         |

|                  |                                                                                                                                |
|------------------|--------------------------------------------------------------------------------------------------------------------------------|
| ARMAN4:or0085    | H <sup>+</sup> -transporting two-sector ATPase alpha/beta subunit central region                                               |
| ARMAN4:or0064    | Superoxide dismutase                                                                                                           |
| ARMAN4:or0046    | Putative uncharacterized protein                                                                                               |
| ARMAN4:or0037    | Putative serine protein kinase, PrkA                                                                                           |
| ARMAN4:or0030    | Putative uncharacterized protein                                                                                               |
| ARMAN4:or0025    | Chaperone protein dnaK                                                                                                         |
| ARMAN4:or0024    | CoA-binding domain protein                                                                                                     |
| ARMAN2_15008_980 | Ribosomal protein S8                                                                                                           |
| ARMAN2_15008_973 | Putative uncharacterized protein                                                                                               |
| ARMAN2_15008_935 | Putative uncharacterized protein                                                                                               |
| ARMAN2_15008_921 | Ribosomal protein S2                                                                                                           |
| ARMAN2_15008_918 | Putative uncharacterized protein                                                                                               |
| ARMAN2_15008_917 | Type II secretion system protein E                                                                                             |
| ARMAN2_15008_892 | Putative uncharacterized protein                                                                                               |
| ARMAN2_15008_858 | Peptidase U61 LD-carboxypeptidase A                                                                                            |
| ARMAN2_15008_841 | SpoVT/AbrB domain protein                                                                                                      |
| ARMAN2_15008_838 | NADP oxidoreductase coenzyme F420-dependent                                                                                    |
| ARMAN2_15008_837 | deoxyribonuclease                                                                                                              |
| ARMAN2_15008_836 | DNA polymerase sliding clamp                                                                                                   |
| ARMAN2_15008_830 | Putative uncharacterized protein                                                                                               |
| ARMAN2_15008_814 | Ribosomal protein S3-domain protein                                                                                            |
| ARMAN2_15008_804 | DNA gyrase, A subunit                                                                                                          |
| ARMAN2_15008_803 | DNA topoisomerase (ATP-hydrolyzing)                                                                                            |
| ARMAN2_15008_780 | Thermosome                                                                                                                     |
| ARMAN2_15008_778 | hypothetical protein; K07466 replication factor A1                                                                             |
| ARMAN2_15008_769 | 2-oxoacid--ferredoxin oxidoreductase subunit alpha; K00174 2-oxoglutarate ferredoxin oxidoreductase subunit alpha [EC:1.2.7.3] |
| ARMAN2_15008_762 | Aconitate hydratase 1                                                                                                          |
| ARMAN2_15008_752 | hypothetical protein                                                                                                           |
| ARMAN2_15008_750 | aldehyde dehydrogenase; K00294 1-pyrroline-5-carboxylate dehydrogenase [EC:1.5.1.12]                                           |
| ARMAN2_15008_739 | geranylgeranyl reductase                                                                                                       |
| ARMAN2_15008_735 | SMC domain protein                                                                                                             |



|                  |                                                                                                                                     |
|------------------|-------------------------------------------------------------------------------------------------------------------------------------|
| ARMAN2_15008_731 | Ribosomal protein S7                                                                                                                |
| ARMAN2_15008_718 | succinyl-CoA synthetase alpha subunit related protein                                                                               |
| ARMAN2_15008_701 | thioredoxin; K03671 thioredoxin 1                                                                                                   |
| ARMAN2_15008_692 | Proteasome subunit alpha                                                                                                            |
| ARMAN2_15008_689 | Putative uncharacterized protein                                                                                                    |
| ARMAN2_15008_682 | Glu/Leu/Phe/Val dehydrogenase                                                                                                       |
| ARMAN2_15003_652 | Ribosomal protein S13                                                                                                               |
| ARMAN2_15003_644 | inorganic pyrophosphatase; K01507 inorganic pyrophosphatase [EC:3.6.1.1]                                                            |
| ARMAN2_15003_637 | rpl12p; 50S ribosomal protein L12P; K02869 large subunit ribosomal protein L12                                                      |
| ARMAN2_15003_611 | Putative uncharacterized protein                                                                                                    |
| ARMAN2_15003_564 | sdhA; succinate dehydrogenase flavoprotein subunit (EC:1.3.99.1); K00239 succinate dehydrogenase flavoprotein subunit [EC:1.3.99.1] |
| ARMAN2_15003_559 | Malate dehydrogenase (Oxaloacetate-decarboxylating) (NADP(+))                                                                       |
| ARMAN2_15003_558 | Putative uncharacterized protein                                                                                                    |
| ARMAN2_15003_521 | Putative uncharacterized protein                                                                                                    |
| ARMAN2_15003_493 | Putative uncharacterized protein                                                                                                    |
| ARMAN2_15003_472 | RNA polymerase beta subunit                                                                                                         |
| ARMAN2_15003_471 | RNA polymerase Rpb2 domain 6                                                                                                        |
| ARMAN2_15003_470 | RNA polymerase alpha subunit                                                                                                        |
| ARMAN2_15003_469 | RNA polymerase Rpb1 domain 5                                                                                                        |
| ARMAN2_15003_459 | Heat shock protein Hsp20                                                                                                            |
| ARMAN2_15003_456 | Chaperone protein dnaK                                                                                                              |
| ARMAN2_15003_455 | chaperone protein DnaJ; K03686 molecular chaperone DnaJ                                                                             |
| ARMAN2_15003_453 | Proteasome endopeptidase complex                                                                                                    |
| ARMAN2_15003_450 | Transcription factor TFIIIB cyclin-related                                                                                          |
| ARMAN2_15003_418 | Glycosyl transferase family 2                                                                                                       |
| ARMAN2_15003_416 | Short-chain dehydrogenase/reductase SDR                                                                                             |
| ARMAN2_15003_406 | Dihydroxy-acid dehydratase                                                                                                          |
| ARMAN2_15003_403 | Aldehyde Dehydrogenase                                                                                                              |
| ARMAN2_15003_400 | hypothetical protein                                                                                                                |
| ARMAN2_15003_350 | Histidine ammonia-lyase                                                                                                             |
| ARMAN2_15003_335 | Glycosyl transferase group 1 (Fragment)                                                                                             |

|                  |                                                                                                                                    |
|------------------|------------------------------------------------------------------------------------------------------------------------------------|
| ARMAN2_15002_308 | Putative uncharacterized protein                                                                                                   |
| ARMAN2_15002_301 | ATP-dependent protease Lon; K04076 Lon-like ATP-dependent protease [EC:3.4.21.-]                                                   |
| ARMAN2_15002_297 | ribonucleoside-diphosphate reductase; K00525 ribonucleoside-diphosphate reductase alpha chain [EC:1.17.4.1]                        |
| ARMAN2_15001_250 | Elongation factor 1-alpha                                                                                                          |
| ARMAN2_15001_235 | DNA polymerase II, large subunit DP2 (EC:2.7.7.7); K02322 DNA polymerase II large subunit [EC:2.7.7.7]                             |
| ARMAN2_15001_224 | Putative signal transduction protein with CBS domains                                                                              |
| ARMAN2_15001_218 | tRNA/rRNA methyltransferase (SpoU)                                                                                                 |
| ARMAN2_15001_214 | cell division protein FtsZ                                                                                                         |
| ARMAN2_15001_204 | ATP synthase, A subunit (EC:3.6.3.14); K02117 V-type H <sup>+</sup> -transporting ATPase subunit A [EC:3.6.3.14]                   |
| ARMAN2_15001_203 | H <sup>+</sup> -transporting two-sector ATPase alpha/beta subunit central region                                                   |
| ARMAN2_15001_177 | hypothetical protein; K06937                                                                                                       |
| ARMAN2_13246_120 | cell division protein CDC48; K13525 transitional endoplasmic reticulum ATPase                                                      |
| ARMAN2_13246_116 | Transcriptional regulator, TrmB                                                                                                    |
| ARMAN2_13235_40  | Putative uncharacterized protein                                                                                                   |
| APL_17518_0017   | gamma-glutamyltransferase related protein; K00681 gamma-glutamyltranspeptidase [EC:2.3.2.2]                                        |
| APL_17518_0010   | sterol carrier protein                                                                                                             |
| APL_17518_0009   | alcohol dehydrogenase IV; K00001 alcohol dehydrogenase [EC:1.1.1.1]                                                                |
| APL_17518_0006   | ABC transporter ATP-binding protein; K01990 ABC-2 type transport system ATP-binding protein                                        |
| APL_17500_0037   | sdhB; succinate dehydrogenase iron-sulfur subunit (EC:1.3.99.1); K00240 succinate dehydrogenase iron-sulfur protein [EC:1.3.99.1]  |
| APL_17500_0036   | sdhA; succinate dehydrogenase flavoprotein subunit (EC:1.3.5.1); K00239 succinate dehydrogenase flavoprotein subunit [EC:1.3.99.1] |
| APL_17500_0034   | small heat shock protein (HSP20) related protein                                                                                   |
| APL_17500_0031   | eno; phosphopyruvate hydratase (EC:4.2.1.11); K01689 enolase [EC:4.2.1.11]                                                         |
| APL_17500_0030   | acetyltransferase                                                                                                                  |
| APL_17500_0027   | ATP-dependent protease Lon; K04076 Lon-like ATP-dependent protease [EC:3.4.21.-]                                                   |
| APL_17500_0021   | alaS; alanyl-tRNA synthetase (EC:6.1.1.7); K01872 alanyl-tRNA synthetase [EC:6.1.1.7]                                              |
| APL_17500_0018   | transcription factor; K03627 putative transcription factor                                                                         |
| APL_17500_0016   | beta-hydroxybutyryl-CoA dehydrogenase related protein; K00074 3-hydroxybutyryl-CoA dehydrogenase [EC:1.1.1.157]                    |
| APL_17500_0012   | aspC; aspartyl-tRNA synthetase (EC:6.1.1.12); K01876 aspartyl-tRNA synthetase [EC:6.1.1.12]                                        |
| APL_17500_0003   | type I restriction-modification enzyme, M subunit; K03427 type I restriction enzyme M protein [EC:2.1.1.72]                        |

|                |                                                                                                                               |
|----------------|-------------------------------------------------------------------------------------------------------------------------------|
| APL_17500_0001 | HsdR family type I site-specific deoxyribonuclease; K01153 type I restriction enzyme, R subunit [EC:3.1.21.3]                 |
| APL_17498_0017 | transcription regulator; K00845 glucokinase [EC:2.7.1.2]                                                                      |
| APL_17498_0009 | pyruvate kinase (EC:2.7.1.40); K00873 pyruvate kinase [EC:2.7.1.40]                                                           |
| APL_17498_0008 | peptidyl-prolyl cis-trans isomerase (EC:5.2.1.8); K01802 peptidylprolyl isomerase [EC:5.2.1.8]                                |
| APL_17498_0006 | 50S ribosomal protein L18e; K02883 large subunit ribosomal protein L18e                                                       |
| APL_17498_0004 | rps9p; 30S ribosomal protein S9P; K02996 small subunit ribosomal protein S9                                                   |
| APL_17498_0003 | DNA-directed RNA polymerase subunit N (EC:2.7.7.6); K03058 DNA-directed RNA polymerase subunit N [EC:2.7.7.6]                 |
| APL_17493_0013 | 4-hydroxybenzoate transporter                                                                                                 |
| APL_17487_0019 | signal recognition particle receptor FtsY; K03110 fused signal recognition particle receptor                                  |
| APL_17487_0018 | prefoldin subunit alpha; K04797 prefoldin alpha subunit                                                                       |
| APL_17487_0017 | Phosphoglycerate kinase                                                                                                       |
| APL_17487_0016 | pgk; phosphoglycerate kinase (EC:2.7.2.3); K00927 phosphoglycerate kinase [EC:2.7.2.3]                                        |
| APL_17487_0015 | glucose-1-phosphate thymidyltransferase related protein; K00973 glucose-1-phosphate thymidyltransferase [EC:2.7.7.24]         |
| APL_17487_0014 | sulfolipid biosynthesis protein                                                                                               |
| APL_17487_0010 | hypothetical protein; K07577 putative mRNA 3-end processing factor                                                            |
| APL_17487_0009 | RNA processing exonuclease; K07577 putative mRNA 3-end processing factor                                                      |
| APL_17487_0008 | 5'-methylthioadenosine phosphorylase II (EC:2.4.2.28); K00772 5'-methylthioadenosine phosphorylase [EC:2.4.2.28]              |
| APL_17481_0009 | 2-amino-3-ketobutyrate coenzyme A ligase (EC:2.3.1.29); K00639 glycine C-acetyltransferase [EC:2.3.1.29]                      |
| APL_17481_0008 | hypothetical protein                                                                                                          |
| APL_17481_0006 | carbamoyl phosphate synthase small subunit (EC:6.3.5.5); K01956 carbamoyl-phosphate synthase small subunit [EC:6.3.5.5]       |
| APL_17481_0005 | carB; carbamoyl phosphate synthase large subunit (EC:6.3.5.5); K01955 carbamoyl-phosphate synthase large subunit [EC:6.3.5.5] |
| APL_17481_0003 | geranylgeranyl reductase                                                                                                      |
| APL_17472_0049 | metal-dependent hydrolase                                                                                                     |
| APL_17472_0048 | metal-dependent hydrolase                                                                                                     |
| APL_17472_0047 | mannose-1-phosphate guanyltransferase related protein                                                                         |
| APL_17472_0039 | CBS domain-containing protein                                                                                                 |
| APL_17472_0038 | glycyl-tRNA synthetase (EC:6.1.1.14); K01880 glycyl-tRNA synthetase [EC:6.1.1.14]                                             |
| APL_17472_0033 | ABC transporter ATP-binding protein                                                                                           |

|                |                                                                                                                       |
|----------------|-----------------------------------------------------------------------------------------------------------------------|
| APL_17472_0026 | aldehyde dehydrogenase family protein; K00155 [EC:1.2.1.-]                                                            |
| APL_17472_0025 | isocitrate dehydrogenase; K00031 isocitrate dehydrogenase [EC:1.1.1.42]                                               |
| APL_17472_0023 | purA; adenylosuccinate synthetase (EC:6.3.4.4); K01939 adenylosuccinate synthase [EC:6.3.4.4]                         |
| APL_17472_0021 | urocanate hydratase (EC:4.2.1.49); K01712 urocanate hydratase [EC:4.2.1.49]                                           |
| APL_17472_0018 | mannose-1-phosphate guanyltransferase (EC:2.7.7.13); K00966 mannose-1-phosphate guanylyltransferase [EC:2.7.7.13]     |
| APL_17472_0017 | hypothetical protein                                                                                                  |
| APL_17472_0013 | orotidine 5'-phosphate decarboxylase (EC:4.1.1.23); K01591 orotidine-5'-phosphate decarboxylase [EC:4.1.1.23]         |
| APL_17472_0010 | pyrE; orotate phosphoribosyltransferase (EC:2.4.2.10); K00762 orotate phosphoribosyltransferase [EC:2.4.2.10]         |
| APL_17472_0009 | TIF6; translation initiation factor IF-6; K03264 translation initiation factor eIF-6                                  |
| APL_17472_0008 | 50S ribosomal protein L31e; K02910 large subunit ribosomal protein L31e                                               |
| APL_17472_0006 | hypothetical protein; K06875                                                                                          |
| APL_17472_0005 | 30S ribosomal protein S19e; K02966 small subunit ribosomal protein S19e                                               |
| APL_17472_0003 | gliding motility protein related                                                                                      |
| APL_17466_0017 | nicotinate phosphoribosyltransferase (EC:2.4.2.11); K00763 nicotinate phosphoribosyltransferase [EC:2.4.2.11]         |
| APL_17466_0005 | pepQ-like3; prolidase (Xaa-Pro dipeptidase) (PepQ-like3) (EC:3.4.13.9)                                                |
| APL_17462_0060 | NAD-dependent aldehyde dehydrogenase; K00130 betaine-aldehyde dehydrogenase [EC:1.2.1.8]                              |
| APL_17462_0058 | 2-hydroxyacid dehydrogenase                                                                                           |
| APL_17462_0032 | hypothetical protein                                                                                                  |
| APL_17462_0023 | glucose 1-dehydrogenase; K04708 3-dehydrosphinganine reductase [EC:1.1.1.102]                                         |
| APL_17462_0014 | hypothetical protein                                                                                                  |
| APL_17454_0010 | putative alcohol dehydrogenase; K00001 alcohol dehydrogenase [EC:1.1.1.1]                                             |
| APL_17452_0021 | 30S ribosomal protein S3Ae; K02984 small subunit ribosomal protein S3Ae                                               |
| APL_17452_0020 | arginine deiminase                                                                                                    |
| APL_17452_0017 | DNA-directed RNA polymerase subunit E'; K03049 DNA-directed RNA polymerase subunit E' [EC:2.7.7.6]                    |
| APL_17452_0016 | rpoE; DNA-directed RNA polymerase subunit E" (EC:2.7.7.6); K03050 DNA-directed RNA polymerase subunit E" [EC:2.7.7.6] |
| APL_17452_0014 | rps24e; 30S ribosomal protein S24e; K02974 small subunit ribosomal protein S24e                                       |
| APL_17452_0010 | hypothetical protein; K03724 ATP-dependent helicase Lhr and Lhr-like helicase [EC:3.6.1.-]                            |
| APL_17452_0004 | putative alcohol dehydrogenase; K00001 alcohol dehydrogenase [EC:1.1.1.1]                                             |
| APL_17449_0026 | ribonuclease Z (EC:3.1.26.11); K00784 ribonuclease Z [EC:3.1.26.11]                                                   |
| APL_17449_0022 | thiosulfate sulfurtransferase (EC:2.8.1.1); K01010 thiosulfate sulfurtransferase [EC:2.8.1.1]                         |

|                |                                                                                                                        |
|----------------|------------------------------------------------------------------------------------------------------------------------|
| APL_17449_0021 | phosphoribosylamine--glycine ligase (EC:6.3.4.13); K01945 phosphoribosylamine--glycine ligase [EC:6.3.4.13]            |
| APL_17449_0020 | protein translation elongation factor                                                                                  |
| APL_17449_0017 | hypothetical protein                                                                                                   |
| APL_17449_0015 | asnC; asparaginyl-tRNA synthetase (EC:6.1.1.22); K01893 asparaginyl-tRNA synthetase [EC:6.1.1.22]                      |
| APL_17445_0046 | cysteine synthase (EC:2.5.1.47); K01738 cysteine synthase A [EC:2.5.1.47]                                              |
| APL_17445_0044 | VAT ATPase (VCP-like ATPase); K13525 transitional endoplasmic reticulum ATPase                                         |
| APL_17445_0041 | peptide chain release factor 1; K03265 peptide chain release factor eRF subunit 1                                      |
| APL_17445_0040 | pyrH; uridylate kinase (EC:2.7.4.-); K09903 uridylate kinase [EC:2.7.4.22]                                             |
| APL_17445_0039 | Fe-S oxidoreductase                                                                                                    |
| APL_17445_0036 | ABC transporter related protein; K09687 antibiotic transport system ATP-binding protein                                |
| APL_17445_0030 | hypothetical protein                                                                                                   |
| APL_17445_0029 | hypothetical protein; K00123 formate dehydrogenase, alpha subunit [EC:1.2.1.2]                                         |
| APL_17445_0024 | moaC; putative molybdenum cofactor biosynthesis protein MoaC; K03637 molybdenum cofactor biosynthesis protein C        |
| APL_17445_0019 | hypothetical protein                                                                                                   |
| APL_17445_0013 | hypothetical protein                                                                                                   |
| APL_17442_0020 | aldehyde dehydrogenase; K07248 lactaldehyde dehydrogenase / glycolaldehyde dehydrogenase [EC:1.2.1.22 1.2.1.21]        |
| APL_17442_0019 | molybdenum cofactor biosynthesis protein A; K06937                                                                     |
| APL_17442_0018 | Fe-S oxidoreductase; K06937                                                                                            |
| APL_17442_0016 | pyruvoyl-dependent arginine decarboxylase (EC:4.1.1.19); K02626 arginine decarboxylase [EC:4.1.1.19]                   |
| APL_17442_0015 | leuS; leucyl-tRNA synthetase (EC:6.1.1.4); K01869 leucyl-tRNA synthetase [EC:6.1.1.4]                                  |
| APL_17442_0014 | short chain dehydrogenase                                                                                              |
| APL_17442_0010 | ATP-dependent DNA ligase (EC:6.5.1.1); K10747 DNA ligase 1 [EC:6.5.1.1]                                                |
| APL_17442_0009 | single-stranded DNA-binding protein; K07466 replication factor A1                                                      |
| APL_17439_0035 | hypothetical protein                                                                                                   |
| APL_17439_0031 | methylmalonyl-CoA mutase alpha subunit (EC:5.4.99.2); K01849 methylmalonyl-CoA mutase, C-terminal domain [EC:5.4.99.2] |
| APL_17439_0030 | GTPase; K07588 LAO/AO transport system kinase [EC:2.7.-.-]                                                             |
| APL_17439_0028 | ABC transporter related protein                                                                                        |
| APL_17439_0022 | proteasome subunit alpha (EC:3.4.25.1); K03432 proteasome alpha subunit [EC:3.4.25.1]                                  |
| APL_17439_0021 | putative RNA-associated protein; K07582 hypothetical protein                                                           |

|                |                                                                                                                   |
|----------------|-------------------------------------------------------------------------------------------------------------------|
| APL_17439_0020 | exosome complex RNA-binding protein Rrp4; K03679 exosome complex component RRP4                                   |
| APL_17439_0019 | exosome complex exonuclease Rrp41; K11600 exosome complex component RRP41                                         |
| APL_17439_0018 | exosome complex RNA-binding protein Rrp42; K12589 exosome complex component RRP42                                 |
| APL_17439_0017 | rpl37ae; 50S ribosomal protein L37Ae; K02921 large subunit ribosomal protein L37Ae                                |
| APL_17439_0013 | RNA-binding protein; K07572 putative nucleotide binding protein                                                   |
| APL_17439_0011 | band 7 integral membrane protein-like protein                                                                     |
| APL_17439_0009 | pyruvate phosphate dikinase (EC:2.7.9.1); K01006 pyruvate,orthophosphate dikinase [EC:2.7.9.1]                    |
| APL_17439_0008 | pyruvate phosphate dikinase (EC:2.7.9.1); K01006 pyruvate,orthophosphate dikinase [EC:2.7.9.1]                    |
| APL_17439_0007 | purine phosphoribosyltransferase related protein; K07101                                                          |
| APL_17439_0005 | solute-binding protein; K07083                                                                                    |
| APL_17433_0053 | ornithine carbamoyltransferase (EC:2.1.3.3); K00611 ornithine carbamoyltransferase [EC:2.1.3.3]                   |
| APL_17433_0052 | succinyl-CoA synthetase subunit alpha (EC:6.2.1.5); K01902 succinyl-CoA synthetase alpha subunit [EC:6.2.1.5]     |
| APL_17433_0051 | sucC; succinyl-CoA synthetase subunit beta (EC:6.2.1.5); K01903 succinyl-CoA synthetase beta subunit [EC:6.2.1.5] |
| APL_17433_0050 | thioredoxin reductase; K00384 thioredoxin reductase (NADPH) [EC:1.8.1.9]                                          |
| APL_17433_0048 | thermosome, alpha chain                                                                                           |
| APL_17433_0046 | hypothetical protein; K07068                                                                                      |
| APL_17433_0045 | acetyl-CoA acetyltransferase (EC:2.3.1.9); K00626 acetyl-CoA C-acetyltransferase [EC:2.3.1.9]                     |
| APL_17433_0044 | NADH-dependent oxidoreductase (EC:1.6.-.-); K00359 NADH oxidase [EC:1.6.-.-]                                      |
| APL_17433_0039 | hypothetical protein                                                                                              |
| APL_17433_0029 | homoserine dehydrogenase (EC:1.1.1.3); K00003 homoserine dehydrogenase [EC:1.1.1.3]                               |
| APL_17433_0028 | DNA gyrase subunit A; K02469 DNA gyrase subunit A [EC:5.99.1.3]                                                   |
| APL_17433_0027 | gyrB; DNA gyrase subunit B; K02470 DNA gyrase subunit B [EC:5.99.1.3]                                             |
| APL_17433_0021 | gltX; glutamyl-tRNA synthetase (EC:6.1.1.17); K01885 glutamyl-tRNA synthetase [EC:6.1.1.17]                       |
| APL_17433_0020 | gltX; glutamyl-tRNA synthetase (EC:6.1.1.17); K01885 glutamyl-tRNA synthetase [EC:6.1.1.17]                       |
| APL_17433_0018 | GMP synthase subunit A (EC:6.3.5.2); K01951 GMP synthase (glutamine-hydrolysing) [EC:6.3.5.2]                     |
| APL_17433_0017 | tfb; transcription initiation factor IIB; K03124 transcription initiation factor TFIIIB                           |
| APL_17433_0015 | tfb; transcription initiation factor IIB; K03124 transcription initiation factor TFIIIB                           |
| APL_17433_0013 | 2-methylcitrate synthase/citrate synthase II (EC:2.3.3.1); K01647 citrate synthase [EC:2.3.3.1]                   |
| APL_17433_0010 | threonine synthase (EC:4.2.3.1); K01733 threonine synthase [EC:4.2.3.1]                                           |
| APL_17433_0007 | metB; hypothetical protein; K01739 cystathionine gamma-synthase [EC:2.5.1.48]                                     |
| APL_17433_0004 | FAD-dependent pyridine nucleotide-disulfide oxidoreductase                                                        |

|                |                                                                                                                                           |
|----------------|-------------------------------------------------------------------------------------------------------------------------------------------|
| APL_17433_0003 | acetyl-coenzyme-A synthetase; K01895 acetyl-CoA synthetase [EC:6.2.1.1]                                                                   |
| APL_17433_0002 | acetyl-coenzyme-A synthetase; K01895 acetyl-CoA synthetase [EC:6.2.1.1]                                                                   |
| APL_17428_0041 | DNA polymerase sliding clamp; K04802 proliferating cell nuclear antigen                                                                   |
| APL_17428_0038 | malate dehydrogenase (EC:1.1.1.37); K00024 malate dehydrogenase [EC:1.1.1.37]                                                             |
| APL_17428_0036 | ATPase                                                                                                                                    |
| APL_17428_0033 | putative peroxiredoxin (EC:1.11.1.15); K03386 peroxiredoxin (alkyl hydroperoxide reductase subunit C) [EC:1.11.1.15]                      |
| APL_17428_0031 | sec-independent protein translocase protein TatA; K03116 sec-independent protein translocase protein Tata                                 |
| APL_17428_0017 | NADH dehydrogenase subunit D (EC:1.6.5.3); K00333 NADH dehydrogenase I subunit D [EC:1.6.5.3]                                             |
| APL_17428_0013 | glutamyl-tRNA(Gln) amidotransferase subunit E; K03330 glutamyl-tRNA(Gln) amidotransferase subunit E [EC:6.3.5.7]                          |
| APL_17428_0012 | glutamyl-tRNA(Gln) amidotransferase subunit D; K09482 glutamyl-tRNA(Gln) amidotransferase subunit D [EC:6.3.5.7]                          |
| APL_17428_0009 | acyl-CoA dehydrogenase; K00257 [EC:1.3.99.-]                                                                                              |
| APL_17428_0007 | rubrerythrin                                                                                                                              |
| APL_17393_0043 | hypothetical protein                                                                                                                      |
| APL_17393_0038 | glycine dehydrogenase subunit 2 (EC:1.4.4.2); K00283 glycine dehydrogenase subunit 2 [EC:1.4.4.2]                                         |
| APL_17393_0035 | replication factor A; K07466 replication factor A1                                                                                        |
| APL_17393_0034 | hypothetical protein                                                                                                                      |
| APL_17393_0032 | hypothetical protein                                                                                                                      |
| APL_17393_0029 | adhP; Zn-dependent alcohol dehydrogenase; K13953 alcohol dehydrogenase, propanol-preferring [EC:1.1.1.1]                                  |
| APL_17393_0020 | transcriptional regulator                                                                                                                 |
| APL_17393_0010 | inorganic pyrophosphatase (EC:3.6.1.1); K01507 inorganic pyrophosphatase [EC:3.6.1.1]                                                     |
| APL_17393_0007 | hypothetical protein                                                                                                                      |
| APL_17393_0006 | chaperonin GroEL                                                                                                                          |
| APL_17393_0003 | acyl-CoA dehydrogenase; K00249 acyl-CoA dehydrogenase [EC:1.3.99.3]                                                                       |
| APL_17387_0044 | hypothetical protein                                                                                                                      |
| APL_17387_0042 | hydroxymethylglutaryl-CoA reductase, degradative (EC:1.1.1.88); K00054 hydroxymethylglutaryl-CoA reductase [EC:1.1.1.88]                  |
| APL_17387_0041 | pyrB; aspartate carbamoyltransferase catalytic subunit (EC:2.1.3.2); K00609 aspartate carbamoyltransferase catalytic subunit [EC:2.1.3.2] |
| APL_17387_0040 | aspartate carbamoyltransferase regulatory subunit (EC:2.1.3.2); K00610 aspartate carbamoyltransferase regulatory subunit                  |

|                |                                                                                                                            |
|----------------|----------------------------------------------------------------------------------------------------------------------------|
| APL_17387_0037 | translation initiation factor IF-2 subunit beta; K03238 translation initiation factor eIF-2 beta subunit                   |
| APL_17387_0035 | winged helix-turn-helix domain-containing protein/riboflavin kinase; K07732 riboflavin kinase, archaea type [EC:2.7.1.161] |
| APL_17387_0031 | geranylgeranylglyceryl phosphate synthase-like protein; K07094                                                             |
| APL_17387_0026 | putative NTPase; K06928                                                                                                    |
| APL_17387_0025 | hypothetical protein; K09739 hypothetical protein                                                                          |
| APL_17387_0017 | acyl-CoA hydrolase related protein                                                                                         |
| APL_17387_0016 | ribose-5-phosphate isomerase A (EC:5.3.1.6); K01807 ribose 5-phosphate isomerase A [EC:5.3.1.6]                            |
| APL_17387_0015 | ArsR family transcriptional regulator                                                                                      |
| APL_17387_0013 | AsnC family transcriptional regulator                                                                                      |
| APL_17387_0006 | 6,7-dimethyl-8-ribityllumazine synthase (EC:2.5.1.9); K00794 riboflavin synthase beta chain [EC:2.5.1.-]                   |
| APL_17365_0050 | hypothetical protein                                                                                                       |
| APL_17365_0048 | zinc metalloprotease (EC:3.4.24.-); K07386 putative endopeptidase [EC:3.4.24.-]                                            |
| APL_17365_0047 | protease (PspA) related protein                                                                                            |
| APL_17365_0044 | universal stress protein                                                                                                   |
| APL_17365_0032 | hypothetical protein; K09129 hypothetical protein                                                                          |
| APL_17365_0026 | hypothetical protein                                                                                                       |
| APL_17365_0018 | putative signal recognition particle; K03105 signal recognition particle subunit SRP19                                     |
| APL_17365_0016 | proline dipeptidase related protein; K01271 X-Pro dipeptidase [EC:3.4.13.9]                                                |
| APL_17365_0015 | Xaa-Pro dipeptidase (EC:3.4.13.9); K01271 X-Pro dipeptidase [EC:3.4.13.9]                                                  |
| APL_17365_0009 | dihydroorotase (EC:3.5.2.3); K01465 dihydroorotase [EC:3.5.2.3]                                                            |
| APL_17365_0006 | hypothetical protein                                                                                                       |
| APL_17357_0093 | hypothetical protein; K03564 peroxiredoxin Q/BCP [EC:1.11.1.15]                                                            |
| APL_17357_0091 | hypothetical protein                                                                                                       |
| APL_17357_0090 | hypothetical protein; K01720 2-methylcitrate dehydratase [EC:4.2.1.79]                                                     |
| APL_17357_0088 | carboxyphosphoenolpyruvate phosphonmutase; K01003 carboxyvinyl-carboxyphosphonate phosphorylmutase [EC:2.7.8.23]           |
| APL_17357_0084 | DNA-directed RNA polymerase subunit D (EC:2.7.7.6); K03047 DNA-directed RNA polymerase subunit D [EC:2.7.7.6]              |
| APL_17357_0083 | rps11p; 30S ribosomal protein S11P; K02948 small subunit ribosomal protein S11                                             |
| APL_17357_0082 | rps4p; 30S ribosomal protein S4P; K02986 small subunit ribosomal protein S4                                                |
| APL_17357_0081 | rps13p; 30S ribosomal protein S13P; K02952 small subunit ribosomal protein S13                                             |



|                |                                                                                                                     |
|----------------|---------------------------------------------------------------------------------------------------------------------|
| APL_17357_0067 | DNA-directed RNA polymerase subunit A" (EC:2.7.7.6); K03042 DNA-directed RNA polymerase subunit A" [EC:2.7.7.6]     |
| APL_17357_0066 | DNA-directed RNA polymerase subunit A' (EC:2.7.7.6); K03041 DNA-directed RNA polymerase subunit A' [EC:2.7.7.6]     |
| APL_17357_0065 | DNA-directed RNA polymerase subunit B (EC:2.7.7.6); K13798 DNA-directed RNA polymerase subunit B [EC:2.7.7.6]       |
| APL_17357_0064 | rpoH; DNA-directed RNA polymerase subunit H (EC:2.7.7.6); K03053 DNA-directed RNA polymerase subunit H [EC:2.7.7.6] |
| APL_17357_0062 | ABC transporter-like protein; K01990 ABC-2 type transport system ATP-binding protein                                |
| APL_17357_0060 | translation initiation factor IF-2B subunit alpha; K03239 translation initiation factor eIF-2B alpha subunit        |
| APL_17357_0041 | translation initiation factor IF-2 subunit alpha; K03237 translation initiation factor eIF-2 alpha subunit          |
| APL_17357_0036 | small nuclear ribonucleoprotein; K04796 small nuclear ribonucleoprotein                                             |
| APL_17357_0032 | H/ACA RNA-protein complex component Cbf5p; K03177 tRNA pseudouridine synthase B [EC:5.4.99.12]                      |
| APL_17357_0029 | adenylate kinase (EC:2.7.4.3); K00939 adenylate kinase [EC:2.7.4.3]                                                 |
| APL_17357_0026 | rpl30p; 50S ribosomal protein L30P; K02907 large subunit ribosomal protein L30                                      |
| APL_17357_0025 | rps5p; 30S ribosomal protein S5P; K02988 small subunit ribosomal protein S5                                         |
| APL_17357_0024 | rpl18p; 50S ribosomal protein L18P; K02881 large subunit ribosomal protein L18                                      |
| APL_17357_0023 | rpl19e; 50S ribosomal protein L19e; K02885 large subunit ribosomal protein L19e                                     |
| APL_17357_0022 | rpl32e; 50S ribosomal protein L32e; K02912 large subunit ribosomal protein L32e                                     |
| APL_17357_0021 | rpl6p; 50S ribosomal protein L6P; K02933 large subunit ribosomal protein L6                                         |
| APL_17357_0020 | rps8p; 30S ribosomal protein S8P; K02994 small subunit ribosomal protein S8                                         |
| APL_17357_0018 | rpl5p; 50S ribosomal protein L5P; K02931 large subunit ribosomal protein L5                                         |
| APL_17357_0017 | 30S ribosomal protein S4e; K02987 small subunit ribosomal protein S4e                                               |
| APL_17357_0016 | rpl24p; 50S ribosomal protein L24P; K02895 large subunit ribosomal protein L24                                      |
| APL_17357_0015 | rpl14p; 50S ribosomal protein L14P; K02874 large subunit ribosomal protein L14                                      |
| APL_17357_0014 | rps17p; 30S ribosomal protein S17P; K02961 small subunit ribosomal protein S17                                      |
| APL_17357_0011 | rps3p; 30S ribosomal protein S3P; K02982 small subunit ribosomal protein S3                                         |
| APL_17357_0010 | rpl22p; 50S ribosomal protein L22P; K02890 large subunit ribosomal protein L22                                      |
| APL_17357_0009 | rps19p; 30S ribosomal protein S19P; K02965 small subunit ribosomal protein S19                                      |
| APL_17357_0008 | rpl2p; 50S ribosomal protein L2P; K02886 large subunit ribosomal protein L2                                         |
| APL_17357_0007 | rplW; 50S ribosomal protein L23P; K02892 large subunit ribosomal protein L23                                        |
| APL_17357_0006 | rpl4p; 50S ribosomal protein L4P; K02930 large subunit ribosomal protein L4e                                        |
| APL_17357_0005 | rpl3p; 50S ribosomal protein L3P; K02906 large subunit ribosomal protein L3                                         |

|                |                                                                                                                 |
|----------------|-----------------------------------------------------------------------------------------------------------------|
| APL_17346_0015 | aminotransferase, class V; K00839 aminotransferase [EC:2.6.1.-]                                                 |
| APL_17346_0014 | TPR domain-containing protein                                                                                   |
| APL_17346_0007 | multitransmembrane protein                                                                                      |
| APL_17346_0003 | hypothetical protein                                                                                            |
| APL_17336_0059 | 4-hydroxyphenylpyruvate dioxygenase (EC:1.13.11.27); K00457 4-hydroxyphenylpyruvate dioxygenase [EC:1.13.11.27] |
| APL_17336_0052 | hypothetical protein                                                                                            |
| APL_17336_0051 | molybdopterin binding domain-containing protein; K03742 competence/damage-inducible protein CinA                |
| APL_17336_0035 | hypothetical protein; K09732 hypothetical protein                                                               |
| APL_17336_0029 | nucleoside-diphosphate-sugar epimerase; K01795 [EC:5.1.3.-]                                                     |
| APL_17336_0022 | hypothetical protein                                                                                            |
| APL_17336_0018 | hypothetical protein                                                                                            |
| APL_17336_0017 | D-3-phosphoglycerate dehydrogenase (EC:1.1.1.95); K00058 D-3-phosphoglycerate dehydrogenase [EC:1.1.1.95]       |
| APL_17336_0016 | D-3-phosphoglycerate dehydrogenase; K00058 D-3-phosphoglycerate dehydrogenase [EC:1.1.1.95]                     |
| APL_17336_0015 | serine--pyruvate aminotransferase; K00839 aminotransferase [EC:2.6.1.-]                                         |
| APL_17336_0013 | TPR domain-containing protein                                                                                   |
| APL_17325_0017 | Rieske iron-sulfur protein SoxF related protein                                                                 |
| APL_17325_0008 | 2-hydroxyhepta-2,4-diene-1,7-dioate isomerase                                                                   |
| APL_17314_0003 | hypothetical protein                                                                                            |
| APL_17306_0034 | regulator of amino acid metabolism; K07103                                                                      |
| APL_17306_0027 | SoxB-like sarcosine oxidase, beta subunit related                                                               |
| APL_17306_0025 | hypothetical protein; K01338 ATP-dependent Lon protease [EC:3.4.21.53]                                          |
| APL_17306_0024 | DNA primase (EC:2.7.7.-)                                                                                        |
| APL_17306_0023 | endonuclease IV; K01151 deoxyribonuclease IV [EC:3.1.21.2]                                                      |
| APL_17306_0021 | DNA-binding protein HTa                                                                                         |
| APL_17306_0019 | spermidine synthase (EC:2.5.1.16); K00797 spermidine synthase [EC:2.5.1.16]                                     |
| APL_17306_0015 | NADH dehydrogenase (quinone) (EC:1.6.99.5)                                                                      |
| APL_17306_0014 | formate dehydrogenase, alpha subunit; K00123 formate dehydrogenase, alpha subunit [EC:1.2.1.2]                  |
| APL_17306_0013 | RPS6; 30S ribosomal protein S6e; K02991 small subunit ribosomal protein S6e                                     |
| APL_17306_0012 | translation initiation factor IF-2 subunit gamma; K03242 translation initiation factor eIF-2 gamma subunit      |
| APL_17306_0010 | dehydrogenase (flavoprotein); K00313 electron transfer flavoprotein-quinone oxidoreductase [EC:1.5.5.-]         |
| APL_17306_0009 | FixC protein related; K00313 electron transfer flavoprotein-quinone oxidoreductase [EC:1.5.5.-]                 |

|                |                                                                                                                              |
|----------------|------------------------------------------------------------------------------------------------------------------------------|
| APL_17306_0008 | ferredoxin-like protein                                                                                                      |
| APL_17306_0007 | electron transfer flavoprotein subunit beta; K03521 electron transfer flavoprotein beta subunit                              |
| APL_17306_0006 | electron transfer flavoprotein subunit alpha; K03522 electron transfer flavoprotein alpha subunit                            |
| APL_17306_0004 | thrS; threonyl-tRNA synthetase (EC:6.1.1.3); K01868 threonyl-tRNA synthetase [EC:6.1.1.3]                                    |
| APL_17300_0022 | UDP-glucose 4-epimerase related protein; K01784 UDP-glucose 4-epimerase [EC:5.1.3.2]                                         |
| APL_17300_0017 | V-type ATP synthase subunit I (EC:3.6.3.14); K02123 V-type H <sup>+</sup> -transporting ATPase subunit I [EC:3.6.3.14]       |
| APL_17300_0016 | hypothetical protein                                                                                                         |
| APL_17300_0013 | V-type ATP synthase subunit B (EC:3.6.3.14); K02118 V-type H <sup>+</sup> -transporting ATPase subunit B [EC:3.6.3.14]       |
| APL_17300_0012 | V-type ATP synthase subunit B (EC:3.6.3.14); K02118 V-type H <sup>+</sup> -transporting ATPase subunit B [EC:3.6.3.14]       |
| APL_17300_0011 | ntpA; V-type ATP synthase subunit A (EC:3.6.3.14); K02117 V-type H <sup>+</sup> -transporting ATPase subunit A [EC:3.6.3.14] |
| APL_17300_0005 | isopentenyl pyrophosphate isomerase (EC:5.3.3.2); K01823 isopentenyl-diphosphate delta-isomerase [EC:5.3.3.2]                |
| APL_17298_0106 | hypothetical protein                                                                                                         |
| APL_17298_0105 | Rieske Fe-S protein                                                                                                          |
| APL_17298_0100 | pyridoxal biosynthesis lyase PdxS; K06215 pyridoxine biosynthesis protein [EC:4.-.-.-]                                       |
| APL_17298_0094 | putative oxidoreductase; K00266 glutamate synthase (NADPH/NADH) small chain [EC:1.4.1.13 1.4.1.14]                           |
| APL_17298_0093 | seryl-tRNA synthetase (EC:6.1.1.11); K01875 seryl-tRNA synthetase [EC:6.1.1.11]                                              |
| APL_17298_0091 | cofactor-independent phosphoglycerate mutase (EC:5.4.2.1); K01834 phosphoglycerate mutase [EC:5.4.2.1]                       |
| APL_17298_0090 | S-adenosyl-L-homocysteine hydrolase (EC:3.3.1.1); K01251 adenosylhomocysteinase [EC:3.3.1.1]                                 |
| APL_17298_0081 | phosphomannomutase; K01835 phosphoglucomutase [EC:5.4.2.2]; K01840 phosphomannomutase [EC:5.4.2.8]                           |
| APL_17298_0069 | hypothetical protein; K07327 archaeal flagellar protein FlaD                                                                 |
| APL_17298_0068 | flagellar protein C; K07822 archaeal flagellar protein FlaC                                                                  |
| APL_17298_0065 | acetyltransferase                                                                                                            |
| APL_17298_0063 | pheT; phenylalanyl-tRNA synthetase subunit beta (EC:6.1.1.20); K01890 phenylalanyl-tRNA synthetase beta chain [EC:6.1.1.20]  |
| APL_17298_0060 | hypothetical protein; K07151 dolichyl-diphosphooligosaccharide--protein glycosyltransferase [EC:2.4.1.119]                   |
| APL_17298_0054 | rps15p; 30S ribosomal protein S15P; K02956 small subunit ribosomal protein S15                                               |
| APL_17298_0047 | peroxiredoxin                                                                                                                |
| APL_17298_0042 | long-chain-fatty-acid--CoA ligase (EC:2.3.1.86); K00666 fatty-acyl-CoA synthase [EC:6.2.1.-]                                 |
| APL_17298_0039 | cell division protein FtsZ; K03531 cell division protein FtsZ                                                                |
| APL_17298_0037 | transketolase; K00615 transketolase [EC:2.2.1.1]                                                                             |
| APL_17298_0036 | putative transaldolase (EC:2.2.1.2); K00616 transaldolase [EC:2.2.1.2]                                                       |

|                |                                                                                                                                                              |
|----------------|--------------------------------------------------------------------------------------------------------------------------------------------------------------|
| APL_17298_0034 | cleavage and polyadenylation specificity factor, 100 kDa subunit; K07041                                                                                     |
| APL_17298_0033 | proteasome, beta chain; K03433 proteasome beta subunit [EC:3.4.25.1]                                                                                         |
| APL_17298_0032 | inosine-5'-monophosphate dehydrogenase related protein                                                                                                       |
| APL_17298_0029 | hemH; phosphoribosylaminoimidazole-succinocarboxamide synthase (EC:6.3.2.6); K01923<br>phosphoribosylaminoimidazole-succinocarboxamide synthase [EC:6.3.2.6] |
| APL_17298_0016 | hypothetical protein                                                                                                                                         |
| APL_17298_0009 | asparagine synthetase A (EC:6.1.1.22); K01893 asparaginyl-tRNA synthetase [EC:6.1.1.22]                                                                      |
| APL_17298_0006 | aldehyde dehydrogenase related protein; K00294 1-pyrroline-5-carboxylate dehydrogenase [EC:1.5.1.12]                                                         |
| APL_17298_0001 | translation initiation factor IF-2; K03243 translation initiation factor IF-2 unclassified subunit                                                           |
| APL_17112_0058 | aspA; aspartate ammonia-lyase (EC:4.3.1.1); K01679 fumarate hydratase, class II [EC:4.2.1.2]                                                                 |
| APL_17112_0057 | 2-oxoacid-ferredoxin oxidoreductase, alpha subunit; K00174 2-oxoglutarate ferredoxin oxidoreductase subunit alpha [EC:1.2.7.3]                               |
| APL_17112_0056 | 2-oxoacid ferredoxin oxidoreductase subunit beta (EC:1.2.7.1); K00175 2-oxoglutarate ferredoxin oxidoreductase subunit beta [EC:1.2.7.3]                     |
| APL_17112_0054 | ABC-type peptide transport system, solute-binding component                                                                                                  |
| APL_17112_0052 | amidohydrolase (EC:3.5.-.-)                                                                                                                                  |
| APL_17112_0049 | ABC-type peptide transporter, ATPase component; K02032 peptide/nickel transport system ATP-binding protein                                                   |
| APL_17112_0048 | ABC-type peptide transport system, ATPase component                                                                                                          |
| APL_17112_0043 | hypothetical protein                                                                                                                                         |
| APL_17112_0041 | hypothetical protein                                                                                                                                         |
| APL_17112_0039 | hypothetical protein                                                                                                                                         |
| APL_17112_0038 | hypothetical protein                                                                                                                                         |
| APL_17112_0036 | aroB; 3-dehydroquinate synthase (EC:4.2.3.4); K01735 3-dehydroquinate synthase [EC:4.2.3.4]                                                                  |
| APL_17112_0033 | ATP-binding protein; K02023 multiple sugar transport system ATP-binding protein                                                                              |
| APL_17112_0030 | hypothetical protein; K02027 multiple sugar transport system substrate-binding protein                                                                       |
| APL_17112_0024 | Fe-S oxidoreductase                                                                                                                                          |
| APL_17112_0022 | proline iminopeptidase; K01259 proline iminopeptidase [EC:3.4.11.5]                                                                                          |
| APL_17112_0018 | hypothetical protein                                                                                                                                         |
| APL_17112_0017 | alpha/beta superfamily hydrolase                                                                                                                             |
| APL_17112_0014 | hypothetical protein                                                                                                                                         |
| APL_17112_0007 | aldehyde ferredoxin oxidoreductase; K03738 aldehyde:ferredoxin oxidoreductase [EC:1.2.7.5]                                                                   |
| APL_17112_0003 | oxidoreductase; K03738 aldehyde:ferredoxin oxidoreductase [EC:1.2.7.5]                                                                                       |

|                |                                                                                                                                                       |
|----------------|-------------------------------------------------------------------------------------------------------------------------------------------------------|
| APL_17112_0002 | oxidoreductase; K03738 aldehyde:ferredoxin oxidoreductase [EC:1.2.7.5]                                                                                |
| APL_17087_0077 | hypothetical protein                                                                                                                                  |
| APL_17087_0075 | glyceraldehyde-3-phosphate dehydrogenase (EC:1.2.1.59); K00150 glyceraldehyde-3-phosphate dehydrogenase (NAD(P)) [EC:1.2.1.59]                        |
| APL_17087_0074 | radA; DNA repair and recombination protein RadA; K04483 DNA repair protein RadA                                                                       |
| APL_17087_0073 | hypothetical protein; K07103                                                                                                                          |
| APL_17087_0071 | purE; phosphoribosylaminoimidazole carboxylase catalytic subunit (EC:4.1.1.21); K01588 5-(carboxyamino)imidazole ribonucleotide mutase [EC:5.4.99.18] |
| APL_17087_0069 | ilvB-5; pyruvate dehydrogenase (EC:1.2.2.2); K00156 pyruvate dehydrogenase (cytochrome) [EC:1.2.2.2]                                                  |
| APL_17087_0068 | aminopeptidase N; K13722 tricorn protease interacting factor F2/3 [EC:3.4.11.-]                                                                       |
| APL_17087_0067 | tricorn protease interacting factor F2; K13722 tricorn protease interacting factor F2/3 [EC:3.4.11.-]                                                 |
| APL_17087_0066 | aminopeptidase N; K13722 tricorn protease interacting factor F2/3 [EC:3.4.11.-]                                                                       |
| APL_17087_0065 | tricorn protease interacting factor F2 (EC:3.4.11.-); K13722 tricorn protease interacting factor F2/3 [EC:3.4.11.-]                                   |
| APL_17087_0064 | PmbA protein; K03592 PmbA protein                                                                                                                     |
| APL_17087_0061 | inosine-5'-monophosphate dehydrogenase (EC:1.1.1.205)                                                                                                 |
| APL_17087_0060 | glycine hydroxymethyltransferase; K00600 glycine hydroxymethyltransferase [EC:2.1.2.1]                                                                |
| APL_17087_0058 | glycerate dehydrogenase (EC:1.1.1.29); K00018 glycerate dehydrogenase [EC:1.1.1.29]                                                                   |
| APL_17087_0057 | HTH DNA-binding protein                                                                                                                               |
| APL_17087_0042 | hisS; histidyl-tRNA synthetase (EC:6.1.1.21); K01892 histidyl-tRNA synthetase [EC:6.1.1.21]                                                           |
| APL_17087_0041 | transcription regulator                                                                                                                               |
| APL_17087_0036 | glutamate-1-semialdehyde aminotransferase (EC:5.4.3.8); K01845 glutamate-1-semialdehyde 2,1-aminomutase [EC:5.4.3.8]                                  |
| APL_17087_0035 | GMP synthase subunit B (EC:6.3.5.2); K01951 GMP synthase (glutamine-hydrolysing) [EC:6.3.5.2]                                                         |
| APL_17087_0034 | rps2P; 30S ribosomal protein S2; K02967 small subunit ribosomal protein S2                                                                            |
| APL_17087_0032 | GTPase; K06883                                                                                                                                        |
| APL_17087_0031 | transcription regulator                                                                                                                               |
| APL_17087_0028 | transcription factor; K03120 transcription initiation factor TFIID TATA-box-binding protein                                                           |
| APL_17087_0021 | inosine 5'-monophosphate dehydrogenase (EC:1.1.1.205); K00088 IMP dehydrogenase [EC:1.1.1.205]                                                        |
| APL_17087_0014 | isocitrate dehydrogenase (EC:1.1.1.42); K00031 isocitrate dehydrogenase [EC:1.1.1.42]                                                                 |
| APL_17087_0010 | hypothetical protein                                                                                                                                  |
| APL_17087_0006 | serine/threonine protein phosphatase                                                                                                                  |
| APL_17087_0002 | hypothetical protein                                                                                                                                  |

|                |                                                                                                                                                        |
|----------------|--------------------------------------------------------------------------------------------------------------------------------------------------------|
| APL_17082_0070 | yycN; GNAT family acetyltransferase (EC:2.3.1.-)                                                                                                       |
| APL_17082_0027 | phospho-2-dehydro-3-deoxyheptonate aldolase; K03856 3-deoxy-7-phosphoheptulonate synthase [EC:2.5.1.54]                                                |
| APL_17082_0014 | long-chain fatty-acid-CoA ligase; K01897 long-chain acyl-CoA synthetase [EC:6.2.1.3]                                                                   |
| APL_17082_0009 | electron transfer flavoprotein, alpha and beta subunits related protein; K03522 electron transfer flavoprotein alpha subunit                           |
| APL_17079_0009 | acetyl-CoA synthetase related protein; K01895 acetyl-CoA synthetase [EC:6.2.1.1]                                                                       |
| APL_17079_0004 | 4-aminobutyrate aminotransferase (EC:2.6.1.19); K00823 4-aminobutyrate aminotransferase [EC:2.6.1.19]                                                  |
| APL_17068_0087 | heterodisulfide reductase related protein                                                                                                              |
| APL_17068_0086 | L-3-hydroxyacyl-CoA dehydrogenase precursor related protein                                                                                            |
| APL_17068_0085 | L-3-hydroxyacyl-CoA dehydrogenase precursor related protein                                                                                            |
| APL_17068_0084 | sterol carrier protein                                                                                                                                 |
| APL_17068_0082 | alkyl hydroperoxide reductase subunit f related protein                                                                                                |
| APL_17068_0081 | metal-dependent hydrolase related to alanyl-tRNA synthetase; K07050                                                                                    |
| APL_17068_0076 | dihydrolipoamide dehydrogenase (EC:1.8.1.4); K00382 dihydrolipoamide dehydrogenase [EC:1.8.1.4]                                                        |
| APL_17068_0075 | branched-chain alpha-keto acid dehydrogenase subunit E2; K00627 pyruvate dehydrogenase E2 component (dihydrolipoamide acetyltransferase) [EC:2.3.1.12] |
| APL_17068_0074 | thiamine pyrophosphate-dependent dehydrogenase, E1 component beta subunit; K00162 pyruvate dehydrogenase E1 component subunit beta [EC:1.2.4.1]        |
| APL_17068_0073 | 3-methyl-2-oxobutanoate dehydrogenase alpha chain precursor; K00161 pyruvate dehydrogenase E1 component subunit alpha [EC:1.2.4.1]                     |
| APL_17068_0067 | electron transfer flavoprotein subunit alpha; K03522 electron transfer flavoprotein alpha subunit                                                      |
| APL_17068_0066 | electron transfer flavoprotein subunit beta                                                                                                            |
| APL_17068_0064 | acetyl-CoA acetyltransferase (EC:2.3.1.9); K00626 acetyl-CoA C-acetyltransferase [EC:2.3.1.9]                                                          |
| APL_17068_0063 | acyl-CoA dehydrogenase; K00249 acyl-CoA dehydrogenase [EC:1.3.99.3]                                                                                    |
| APL_17068_0062 | acyl-CoA dehydrogenase-like protein                                                                                                                    |
| APL_17068_0040 | formate-tetrahydrofolate ligase; K01938 formate--tetrahydrofolate ligase [EC:6.3.4.3]                                                                  |
| APL_17068_0035 | ferredoxin                                                                                                                                             |
| APL_17068_0034 | phosphoribosylaminoimidazole synthetase (EC:6.3.3.1); K01933 phosphoribosylformylglycinamide cyclo-ligase [EC:6.3.3.1]                                 |
| APL_17068_0029 | mrp; chromosome partitioning ATPase; K03593 ATP-binding protein involved in chromosome partitioning                                                    |
| APL_17068_0027 | orotate phosphoribosyltransferase-like protein; K00762 orotate phosphoribosyltransferase [EC:2.4.2.10]                                                 |
| APL_17068_0026 | lysK; lysyl-tRNA synthetase (EC:6.1.1.6); K04566 lysyl-tRNA synthetase, class I [EC:6.1.1.6]                                                           |
| APL_17068_0021 | nusG; transcription antitermination protein NusG; K02601 transcriptional antiterminator NusG                                                           |

|                |                                                                                                                      |
|----------------|----------------------------------------------------------------------------------------------------------------------|
| APL_17068_0018 | thiol-specific antioxidant related protein; K03564 peroxiredoxin Q/BCP [EC:1.11.1.15]                                |
| APL_17068_0015 | rpl1P; 50S ribosomal protein L1P; K02863 large subunit ribosomal protein L1                                          |
| APL_17068_0014 | rplP0; acidic ribosomal protein P0; K02864 large subunit ribosomal protein L10                                       |
| APL_17068_0013 | rpl12p; 50S ribosomal protein L12P; K02869 large subunit ribosomal protein L12                                       |
| APL_17068_0008 | hypothetical protein                                                                                                 |
| APL_17068_0007 | hypothetical protein                                                                                                 |
| APL_17068_0006 | acetyl-CoA acetyltransferase (EC:2.3.1.9); K00626 acetyl-CoA C-acetyltransferase [EC:2.3.1.9]                        |
| APL_17068_0003 | rfc; replication factor C small subunit; K04801 replication factor C small subunit                                   |
| APL_14887_0077 | yycN; GNAT family acetyltransferase (EC:2.3.1.-)                                                                     |
| APL_14887_0067 | gluconate/galactonate dehydratase (EC:4.2.1.39); K05308 gluconate dehydratase [EC:4.2.1.39]                          |
| APL_14887_0066 | aconitate hydratase (EC:4.2.1.3); K01681 aconitate hydratase 1 [EC:4.2.1.3]                                          |
| APL_14887_0063 | glutamine synthetase; K01915 glutamine synthetase [EC:6.3.1.2]                                                       |
| APL_14887_0061 | valS; valyl-tRNA synthetase (EC:6.1.1.9); K01873 valyl-tRNA synthetase [EC:6.1.1.9]                                  |
| APL_14887_0060 | hypothetical protein                                                                                                 |
| APL_14887_0058 | hypothetical protein; K09716 hypothetical protein                                                                    |
| APL_14887_0056 | hypothetical protein                                                                                                 |
| APL_14887_0051 | pyrG; CTP synthetase (EC:6.3.4.2); K01937 CTP synthase [EC:6.3.4.2]                                                  |
| APL_14887_0046 | superoxide dismutase [Fe] (EC:1.15.1.1); K04564 superoxide dismutase, Fe-Mn family [EC:1.15.1.1]                     |
| APL_14887_0040 | sugar kinase                                                                                                         |
| APL_14887_0039 | ribose-phosphate pyrophosphokinase (EC:2.7.6.1); K00948 ribose-phosphate pyrophosphokinase [EC:2.7.6.1]              |
| APL_14887_0034 | nonspecific lipid-transfer protein; K00632 acetyl-CoA acyltransferase [EC:2.3.1.16]                                  |
| APL_14887_0032 | carnitine dehydratase                                                                                                |
| APL_14887_0029 | glyA; serine hydroxymethyltransferase (EC:2.1.2.1); K00600 glycine hydroxymethyltransferase [EC:2.1.2.1]             |
| APL_14887_0028 | glutamine amidotransferase subunit PdxT; K08681 glutamine amidotransferase [EC:2.6.-.-]                              |
| APL_14887_0027 | aminomethyltransferase (glycine cleavage system T protein); K00605 aminomethyltransferase [EC:2.1.2.10]              |
| APL_14887_0024 | hypothetical protein                                                                                                 |
| APL_13214_0061 | putative peroxiredoxin (EC:1.11.1.15); K03386 peroxiredoxin (alkyl hydroperoxide reductase subunit C) [EC:1.11.1.15] |
| APL_13214_0060 | small nuclear ribonucleoprotein (snRNP)-like protein                                                                 |
| APL_13214_0058 | exosome complex RNA-binding protein Csl4; K07573 exosome complex component CSL4                                      |
| APL_13214_0055 | hypothetical protein                                                                                                 |
| APL_13214_0053 | regulatory protein MoxR related protein; K03924 MoxR-like ATPase [EC:3.6.3.-]                                        |

|                |                                                                                                                                                            |
|----------------|------------------------------------------------------------------------------------------------------------------------------------------------------------|
| APL_13214_0050 | ssnA; metal-dependent hydrolase                                                                                                                            |
| APL_13214_0049 | translation initiation factor IF-5A; K03263 translation initiation factor eIF-5A                                                                           |
| APL_13214_0048 | agmatinase; K01480 agmatinase [EC:3.5.3.11]                                                                                                                |
| APL_13214_0046 | rpl10e; 50S ribosomal protein L10e; K02866 large subunit ribosomal protein L10e                                                                            |
| APL_13214_0042 | hypothetical protein; K07050                                                                                                                               |
| APL_13214_0037 | 2-oxoglutarate ferredoxin oxidoreductase subunit beta; K00175 2-oxoglutarate ferredoxin oxidoreductase subunit beta [EC:1.2.7.3]                           |
| APL_13214_0036 | 2-oxoacid ferredoxin oxidoreductase subunit alpha; K00174 2-oxoglutarate ferredoxin oxidoreductase subunit alpha [EC:1.2.7.3]                              |
| APL_13214_0030 | dihydroorotate dehydrogenase (EC:1.3.3.1); K00226 dihydroorotate oxidase [EC:1.3.3.1]                                                                      |
| APL_13214_0029 | hypothetical protein                                                                                                                                       |
| APL_13214_0022 | protoheme IX farnesyltransferase (EC:2.5.1.-); K02301 protoheme IX farnesyltransferase [EC:2.5.1.-]                                                        |
| APL_13214_0018 | carbon monoxide dehydrogenase subunit G; K09386 hypothetical protein                                                                                       |
| APL_13214_0016 | bifunctional phosphoglucose/phosphomannose isomerase; K01809 mannose-6-phosphate isomerase [EC:5.3.1.8]; K01810 glucose-6-phosphate isomerase [EC:5.3.1.9] |
| APL_13214_0013 | ef1a, tuf; elongation factor 1-alpha (EC:3.6.5.3); K03231 elongation factor EF-1 alpha subunit [EC:3.6.5.3]                                                |
| APL_13214_0012 | rps10p; 30S ribosomal protein S10P; K02946 small subunit ribosomal protein S10                                                                             |
| APL_13214_0011 | fusA; elongation factor EF-2; K03234 elongation factor EF-2 [EC:3.6.5.3]                                                                                   |
| APL_13214_0007 | hypothetical protein                                                                                                                                       |
| APL_13214_0006 | NAD(FAD)-dependent dehydrogenase                                                                                                                           |
| APL_13214_0003 | GrpE protein; K03687 molecular chaperone GrpE                                                                                                              |
| APL_13214_0002 | dnaK; molecular chaperone DnaK; K04043 molecular chaperone DnaK                                                                                            |
| APL_13186_0041 | acetyl-CoA acetyltransferase (EC:2.3.1.9); K00626 acetyl-CoA C-acetyltransferase [EC:2.3.1.9]                                                              |
| APL_13186_0040 | acetyl-CoA acetyltransferase (EC:2.3.1.9); K00626 acetyl-CoA C-acetyltransferase [EC:2.3.1.9]                                                              |
| APL_13186_0039 | 3-hydroxybutyryl-CoA dehydrogenase (EC:1.1.1.157); K00074 3-hydroxybutyryl-CoA dehydrogenase [EC:1.1.1.157]                                                |
| APL_13186_0038 | 3-hydroxybutyryl-CoA hydratase; K01692 enoyl-CoA hydratase [EC:4.2.1.17]                                                                                   |
| APL_13186_0037 | chromosome partition protein smc; K03529 chromosome hypothetical proteinregation protein                                                                   |
| APL_13186_0033 | tyrosyl-tRNA synthetase (EC:6.1.1.1); K01866 tyrosyl-tRNA synthetase [EC:6.1.1.1]                                                                          |
| APL_13186_0028 | prolyl-tRNA synthetase (EC:6.1.1.15); K01881 prolyl-tRNA synthetase [EC:6.1.1.15]                                                                          |
| APL_13186_0027 | diaminopimelate aminotransferase; K01439 succinyl-diaminopimelate desuccinylase [EC:3.5.1.18]                                                              |
| APL_13186_0026 | nicotinamide-nucleotide adenyltransferase (EC:2.7.7.1); K00952 nicotinamide-nucleotide adenyltransferase [EC:2.7.7.1]                                      |



|                |                                                                                                                    |
|----------------|--------------------------------------------------------------------------------------------------------------------|
| APL_13186_0019 | aspartate aminotransferase (EC:2.6.1.1); K00812 aspartate aminotransferase [EC:2.6.1.1]                            |
| APL_13186_0018 | hypothetical protein                                                                                               |
| APL_13186_0010 | NAD(FAD)-dependent dehydrogenase                                                                                   |
| APL_13083_0007 | chromosome hypothetical protein; K03546 exonuclease SbcC                                                           |
| APL_12979_0010 | hypothetical protein                                                                                               |
| APL_12979_0005 | acetyl-CoA synthetase; K09181 hypothetical protein                                                                 |
| APL_12979_0002 | aldo/keto reductase                                                                                                |
| APL_12840_0002 | aldehyde dehydrogenase; K07248 lactaldehyde dehydrogenase / glycolaldehyde dehydrogenase [EC:1.2.1.22<br>1.2.1.21] |
| APL_12840_0001 | molybdenum cofactor biosynthesis protein A; K06937                                                                 |
| APL_12463_0002 | thil; thiamine biosynthesis protein Thil; K03151 thiamine biosynthesis protein Thil                                |
| APL_12102_0002 | hypothetical protein                                                                                               |
| APL_12042_0003 | oxidoreductase; K03738 aldehyde:ferredoxin oxidoreductase [EC:1.2.7.5]                                             |
| APL_11661_0006 | chaperonin GroEL                                                                                                   |
| APL_11661_0005 | thermosome, alpha chain                                                                                            |
| APL_11661_0004 | chaperonin GroEL                                                                                                   |
| APL_11661_0003 | thermosome, alpha chain                                                                                            |
| APL_10622_0001 | hypothetical protein; K03724 ATP-dependent helicase Lhr and Lhr-like helicase [EC:3.6.1.-]                         |
| APL_10144_0001 | D-3-phosphoglycerate dehydrogenase; K00058 D-3-phosphoglycerate dehydrogenase [EC:1.1.1.95]                        |
| APL_00419_0005 | rpl7ae; 50S ribosomal protein L7Ae; K02936 large subunit ribosomal protein L7Ae                                    |
| APL_00419_0004 | rps28e; 30S ribosomal protein S28e; K02979 small subunit ribosomal protein S28e                                    |
| APL_00419_0002 | ndk; nucleoside diphosphate kinase; K00940 nucleoside-diphosphate kinase [EC:2.7.4.6]                              |



|                                 |                           |            |            |            |         |            |            |  |  |
|---------------------------------|---------------------------|------------|------------|------------|---------|------------|------------|--|--|
| 1.10.2.2                        | CytB/PetB                 |            |            |            |         |            |            |  |  |
|                                 | Rieske/PetA               |            | 17965_0147 | 13374_0018 |         |            |            |  |  |
| <b>Cytochrome C oxidase</b>     |                           |            |            |            |         |            |            |  |  |
| 1.9.3.1                         | CoxAC (catalytic subunit) |            |            | 13374_0156 |         |            |            |  |  |
| <b>Cytochrome bd complex</b>    |                           |            |            |            |         |            |            |  |  |
| 1.10.3.-                        | CydA                      |            |            |            |         |            |            |  |  |
|                                 | CydA                      |            |            |            |         |            |            |  |  |
| <b>ATPase A-type</b>            |                           |            |            |            |         |            |            |  |  |
| 3.6.3.14                        | NtpD/AhaD                 |            |            | 13334_0012 |         |            |            |  |  |
|                                 | NtpB/AhaB                 | 17300_0012 |            | 13334_0013 | 97_0004 | 13606_0200 |            |  |  |
|                                 |                           | 17300_0013 |            |            |         |            |            |  |  |
|                                 | NtpA/AtpA                 | 17300_0011 |            | 13334_0014 | 936     | 97_0005    | 13606_0201 |  |  |
|                                 |                           |            |            |            |         |            |            |  |  |
|                                 | NtpG/AhaF                 |            |            | 13334_0015 |         |            |            |  |  |
|                                 | AhaC/NtpC                 |            |            | 13334_0016 |         |            |            |  |  |
|                                 | NtpE/AhaE                 |            |            | 13334_0017 |         |            |            |  |  |
|                                 | NtpI/AhaI                 | 17300_0017 |            | 13334_0010 |         |            |            |  |  |
|                                 | AhaH                      | 17300_0016 |            |            |         |            |            |  |  |
| <b>Entner Doudoroff pathway</b> |                           |            |            |            |         |            |            |  |  |
| 1.1.1.47                        | Glucose dehydrogenase     |            | 15243_0608 | 12303_0024 |         | 107_0012   |            |  |  |
| 4.2.1.39                        | Gluconate dehydratase     | 14887_0067 | 15251_0040 | 13334_0053 | 930     | 11_0004    |            |  |  |
| 4.1.2.-                         | KDG aldolase              |            | 17965_0249 | 13374_0117 |         |            |            |  |  |
| 1.2.1.3                         | GADH                      | 12840_0002 | 15243_0377 | 13374_0164 | 706     | 12_0012    | 13624_0267 |  |  |
| 2.7.1.165                       | Glycerate kinase          |            |            |            |         |            |            |  |  |
| 4.2.1.11                        | Enolase                   | 17500_0031 | 17965_0047 | 13374_0178 | 1336    | 50_0011    |            |  |  |
| 2.7.1.40                        | Pyruvate kinase           | 17498_0009 | 15243_0541 | 13296_0009 |         |            |            |  |  |

|                                       |                                                                |            |                |            |      |         |  |  |     |     |
|---------------------------------------|----------------------------------------------------------------|------------|----------------|------------|------|---------|--|--|-----|-----|
| <b>Embden-Meyerhoff Glycolysis</b>    |                                                                |            |                |            |      |         |  |  |     |     |
| 2.7.1.2                               | Glucokinase                                                    |            | 17965_155      | 13287_0076 |      |         |  |  |     |     |
| 5.3.1.9                               | Glucose-6-phosphate isomerase (archaeal bifunctional enzyme)   | 13214_0016 | EPL_15243_0568 | 13287_0025 |      |         |  |  |     | 255 |
| 4.2.1.13                              | Fructose 1,6-bisphosphate aldolase/phosphatase (archaeal type) | 13214_0029 | 15243_0586     | 13374_0081 | 1320 |         |  |  | 308 | 434 |
|                                       |                                                                | 13214_0030 |                |            |      |         |  |  |     |     |
| 5.3.1.1                               | Triosephosphate isomerase (TIM)                                |            | 15243_0442     | 13296_0103 | 1082 |         |  |  |     |     |
| 1.2.1.59                              | Glyceraldehyde-3-phosphate dehydrogenase (NAD(P))              | 17087_0075 | 17965_0400     | 13459_0136 |      |         |  |  |     |     |
| 2.7.2.3                               | Phosphoglycerate kinase                                        | 17487_0016 | 15243_0230     | 13459_0014 |      |         |  |  |     |     |
| 5.4.2.1                               | Phosphoglycerate mutase                                        | 17298_0091 | 17965_0440     |            |      |         |  |  | 379 |     |
| 5.4.2.1                               |                                                                |            |                | 13459_0073 |      |         |  |  |     |     |
| 4.2.1.11                              | Enolase                                                        | 17500_0031 | 17965_0047     | 13374_0178 | 1336 | 50_0011 |  |  |     |     |
| 2.7.1.40                              | Pyruvate kinase                                                | 17498_0009 | 15243_0541     | 13296_0009 |      |         |  |  |     |     |
| <b>Pyruvate dehydrogenase complex</b> |                                                                |            |                |            |      |         |  |  |     |     |
| 1.2.4.1                               | Pyruvate dehydrogenase E1 component subunit alpha              | 17068_0073 | 15833_38       | 13459_0211 |      |         |  |  |     |     |
| 1.2.4.1                               | Pyruvate dehydrogenase E1 component subunit beta               | 17068_0074 | 15833_37       | 13459_0212 | 867  | 11_0061 |  |  |     |     |
|                                       |                                                                |            |                |            | 371  |         |  |  |     |     |





|                                      |                                                             |            |            |            |      |         |            |  |  |  |
|--------------------------------------|-------------------------------------------------------------|------------|------------|------------|------|---------|------------|--|--|--|
| <b>Fatty acid oxidation</b>          |                                                             |            |            |            |      |         |            |  |  |  |
| 6.2.1.3                              | Fatty acyl-CoA synthetase                                   | 17298_0042 | 15243_0438 | 13477_0036 | 250  |         |            |  |  |  |
|                                      |                                                             |            | 15243_0203 |            |      | 1_0063  |            |  |  |  |
|                                      |                                                             | 17082_0014 | 15243_0207 | 13459_0328 |      |         |            |  |  |  |
|                                      |                                                             |            |            | 13334_0078 |      |         |            |  |  |  |
|                                      |                                                             |            |            | 13290_0075 |      |         |            |  |  |  |
|                                      |                                                             |            |            | 13334_0033 |      |         |            |  |  |  |
| 1.3.8.-                              | Acyl-CoA dehydrogenase                                      | 17393_0003 | 15243_0396 | 13455_0035 |      |         |            |  |  |  |
|                                      |                                                             | 17428_0009 |            |            |      |         |            |  |  |  |
|                                      | Delta-3-cis-delta-2-trans-enoyl-CoA isomerase               | 13186_0039 | 15243_0060 | 13459_0259 | 1530 | 1_0062  |            |  |  |  |
|                                      |                                                             | 17500_0016 |            | 13287_0080 | 1784 | 64_0015 | 13249_0160 |  |  |  |
|                                      |                                                             | 17068_0085 |            | 13290_0086 |      |         |            |  |  |  |
|                                      |                                                             |            |            | 13290_0087 |      |         |            |  |  |  |
| 4.2.1.17                             | Enoyl-CoA hydratase                                         |            | 15243_0377 | 13374_0164 | 706  |         | 13624_0267 |  |  |  |
|                                      |                                                             | 12840_0002 |            | 13287_0036 |      | 12_0012 |            |  |  |  |
|                                      |                                                             | 17462_0060 |            |            |      |         |            |  |  |  |
| 2.3.1.16                             | 3-ketoacyl-CoA thiolase                                     | 17068_0064 | 15833_0048 | 13334_0182 |      |         |            |  |  |  |
|                                      |                                                             | 13186_0040 | 17965_0179 | 13290_0085 | 1532 |         |            |  |  |  |
|                                      |                                                             | 14887_0034 | 17965_0037 | 13334_0127 | 323  | 38_0027 |            |  |  |  |
| <b>Protein transport/ catabolism</b> |                                                             |            |            |            |      |         |            |  |  |  |
|                                      | ABC-type peptide transport system, ATPase                   | 17112_0048 | 15243_0117 |            |      |         |            |  |  |  |
|                                      |                                                             | 17112_0049 | 15243_0118 |            |      |         |            |  |  |  |
|                                      | ABC-type peptide transport system, solute-binding component | 17112_0054 | 15243_0126 |            |      |         |            |  |  |  |
|                                      | Acylaminoacyl-peptidase                                     |            |            | 13334_0090 |      |         |            |  |  |  |

|           |                                                                  |            |            |            |     |         |            |  |  |  |
|-----------|------------------------------------------------------------------|------------|------------|------------|-----|---------|------------|--|--|--|
| 3.5.-.-   | Amidohydrolase                                                   | 17112_0052 |            |            |     |         |            |  |  |  |
|           | Aminopeptidase N                                                 | 17087_0068 | 15243_0335 |            |     |         |            |  |  |  |
|           |                                                                  | 17087_0066 |            |            |     |         |            |  |  |  |
| 3.4.21.-  | Lon-like ATP-dependent protease                                  | 17500_0027 | 17965_0119 | 13374_0182 |     | 50_0012 |            |  |  |  |
|           |                                                                  | 17306_0025 | 15243_0420 | 13455_0062 |     |         |            |  |  |  |
|           | ATP-dependent protease                                           |            |            |            |     |         |            |  |  |  |
| 2.3.2.2   | Gamma-glutamyltranspeptidase                                     |            |            | 12302_0009 | 229 |         |            |  |  |  |
| 3.4.11.1  | Leucyl aminopeptidase                                            |            | 15243_0267 |            |     |         |            |  |  |  |
|           | Membrane associated serine protease                              |            |            |            |     | 20_0005 |            |  |  |  |
|           | Membrane metalloprotease                                         |            |            |            |     |         | 13624_0044 |  |  |  |
| 3.4.11.18 | Methionine aminopeptidase                                        |            |            | 13475_0012 |     |         |            |  |  |  |
|           |                                                                  |            |            | 13459_0265 |     |         |            |  |  |  |
| 3.4.24.11 | M13 family endopeptidase                                         |            |            | 13459_0310 |     |         |            |  |  |  |
|           | Oligopeptide ABC transporter Opp1, ATP binding protein           |            |            | 13459_0128 |     |         | 15911_0573 |  |  |  |
|           | Oligopeptide ABC transporter Opp1, extracellular binding protein |            |            | 13459_0131 |     |         |            |  |  |  |
|           | Oligopeptide ABC transporter Opp1, permease protein              |            |            | 13459_0129 |     |         |            |  |  |  |



|           |                                                        |            |            |            |     |  |            |  |  |  |
|-----------|--------------------------------------------------------|------------|------------|------------|-----|--|------------|--|--|--|
|           | Oligopeptide/dipeptide ABC transporter, ATPase subunit |            |            |            |     |  | 13606_0059 |  |  |  |
| 3.4.13.9  | PepQ-like3; prolidase (Xaa-Pro dipeptidase)            | 17466_0005 |            |            |     |  |            |  |  |  |
|           | Peptidase M61 domain-containing protein                |            | 17965_0416 | 13459_0043 |     |  |            |  |  |  |
| 3.4.21.-  | Peptidase S16, Lon-like protease                       |            |            |            |     |  | 15911_0222 |  |  |  |
|           | Peptidase S8/S53 subtilisin kexin sedolisin            |            |            | 13459_0026 |     |  |            |  |  |  |
|           | Peptidase U61 LD-carboxypeptidase A                    |            |            |            |     |  |            |  |  |  |
| K02032    | Peptide ABC transporter ATP-binding protein            |            |            |            | 139 |  |            |  |  |  |
| 3.4.13.9  | Proline dipeptidase related protein                    | 17365_0016 | 15243_0680 | 13459_0323 |     |  |            |  |  |  |
|           |                                                        |            |            | 12302_0010 |     |  |            |  |  |  |
| 3.4.11.5  | Proline iminopeptidase                                 | 17112_0022 |            |            |     |  |            |  |  |  |
| 3.4.21.26 | Prolyl endopeptidase                                   |            |            | 13459_0206 |     |  |            |  |  |  |
|           | Protease (PspA) related protein                        | 17365_0047 |            |            |     |  |            |  |  |  |
|           | Proteasome endopeptidase complex                       |            |            |            |     |  |            |  |  |  |
| 3.4.25.1  | Proteasome endopeptidase complex, alpha subunit        |            |            |            |     |  | 13624_0064 |  |  |  |

|                           |                                                            |            |            |            |      |          |  |  |  |  |
|---------------------------|------------------------------------------------------------|------------|------------|------------|------|----------|--|--|--|--|
| 3.4.25.1                  | Proteasome protease subunit beta                           |            | 15243_0674 |            |      |          |  |  |  |  |
| 3.4.21.-                  | Putative protease La homolog type 2                        |            |            |            | 1100 | 93_0014  |  |  |  |  |
|                           | Putative S1 family peptidase                               |            |            |            |      | 55_0029  |  |  |  |  |
|                           | Serine protease-like protein                               |            |            |            |      |          |  |  |  |  |
| 3.4.11.-                  | Tricorn protease interacting factor F2                     | 17087_0065 | 17965_0189 | 13287_0152 | 1669 |          |  |  |  |  |
|                           |                                                            | 17087_0067 |            | 13296_0124 | 1669 |          |  |  |  |  |
|                           |                                                            |            |            | 13334_0067 |      |          |  |  |  |  |
| 3.4.11.-                  | Tricorn protease interacting factor F3                     |            |            |            | 1303 | 177_0005 |  |  |  |  |
| 3.4.21.-                  | Tricorn protease                                           |            |            | 13334_0050 | 1719 |          |  |  |  |  |
|                           |                                                            |            |            | 13459_0161 |      |          |  |  |  |  |
|                           | X-Pro dipeptidase                                          |            |            | 12303_0037 |      |          |  |  |  |  |
|                           |                                                            |            |            | 12302_0002 |      |          |  |  |  |  |
| 3.4.13.9                  | Xaa-Pro dipeptidase                                        | 17365_0015 |            |            | 1407 | 5_0090   |  |  |  |  |
| 3.4.24.-                  | Zinc metalloprotease TldD protein                          | 17365_0048 | 15243_0766 | 13287_0150 |      |          |  |  |  |  |
| <b>Sugar transporters</b> |                                                            |            |            |            |      |          |  |  |  |  |
|                           | Trehalose/maltose transport ATP-hydrolyzing subunit        |            |            | 13455_0097 |      |          |  |  |  |  |
|                           | Trehalose/maltose binding protein                          |            |            | 13455_0094 |      |          |  |  |  |  |
|                           | Sugar ABC transporter extracellular solute binding protein |            |            | 13374_0100 |      |          |  |  |  |  |

|  |                                                                    |            |  |            |  |         |  |  |  |  |
|--|--------------------------------------------------------------------|------------|--|------------|--|---------|--|--|--|--|
|  | Sugar ABC transporter<br>ATP binding protein                       |            |  | 13374_0098 |  |         |  |  |  |  |
|  | Sugar ABC transporter<br>1, extracellular binding<br>protein       |            |  | 13290_0080 |  | 12_0054 |  |  |  |  |
|  | Sugar ABC transporter<br>1, ATP binding protein                    |            |  | 13290_0079 |  | 12_0058 |  |  |  |  |
|  | Multiple sugar<br>transport system ATP-<br>binding-like protein    | 17112_0033 |  |            |  |         |  |  |  |  |
|  | Multiple sugar<br>transport system<br>substrate-binding<br>protein | 17112_0030 |  |            |  |         |  |  |  |  |

**Table S5: Gplasma proteins in higher relative abundance in sunken samples**

| Protein    | Annotation                                                                                                                      |
|------------|---------------------------------------------------------------------------------------------------------------------------------|
| 13455_0013 | hypothetical protein                                                                                                            |
| 13327_0045 | universal stress protein                                                                                                        |
| 13459_0287 | hypothetical protein                                                                                                            |
| 13459_0282 | hypothetical protein                                                                                                            |
| 13327_0057 | hypothetical protein                                                                                                            |
| 13327_0055 | hypothetical protein                                                                                                            |
| 13459_0100 | band 7 integral membrane protein-like protein                                                                                   |
| 13455_0058 | hypothetical protein                                                                                                            |
| 13459_0041 | ATPase                                                                                                                          |
| 13287_0011 | N-acyl-L-amino acid amidohydrolase (EC:3.5.1.14); K01436 aminoacylase [EC:3.5.1.14]                                             |
| 13477_0077 | aldo/keto reductase                                                                                                             |
| 13374_0102 | hypothetical protein; K07068                                                                                                    |
| 13374_0072 | NAD(FAD)-dependent dehydrogenase                                                                                                |
| 13290_0173 | O-methyltransferase family 3                                                                                                    |
| 13334_0022 | superoxide dismutase; K04564 superoxide dismutase, Fe-Mn family [EC:1.15.1.1]                                                   |
| 13334_0053 | galactonate dehydratase                                                                                                         |
| 13459_0036 | DNA polymerase sliding clamp; K04802 proliferating cell nuclear antigen                                                         |
| 13287_0124 | transcription factor; K03120 transcription initiation factor TFIID TATA-box-binding protein                                     |
| 13374_0118 | rpl7ae; 50S ribosomal protein L7Ae; K02936 large subunit ribosomal protein L7Ae                                                 |
| 13374_0101 | acetyl-CoA acetyltransferase (EC:2.3.1.9); K00626 acetyl-CoA C-acetyltransferase [EC:2.3.1.9]                                   |
| 13455_0035 | acyl-CoA dehydrogenase; K00257 [EC:1.3.99.-]                                                                                    |
| 12303_0024 | glucose-1-dehydrogenase (EC:1.1.1.47); K00034 glucose 1-dehydrogenase [EC:1.1.1.47]                                             |
| 13287_0116 | pyruvate phosphate dikinase (EC:2.7.9.1); K01006 pyruvate,orthophosphate dikinase [EC:2.7.9.1]                                  |
| 13290_0080 | sugar ABC transporter 1, extracellular binding protein; K02027 multiple sugar transport system substrate-binding protein        |
| 13290_0071 | putative transaldolase (EC:2.2.1.2); K00616 transaldolase [EC:2.2.1.2]                                                          |
| 13374_0117 | dihydrodipicolinate synthetase; K01714 dihydrodipicolinate synthase [EC:4.2.1.52]                                               |
| 13459_0095 | acetolactate synthase (EC:2.2.1.6); K01652 acetolactate synthase I/II/III large subunit [EC:2.2.1.6]                            |
| 13334_0132 | ilvE; branched-chain amino acid aminotransferase (EC:2.6.1.42); K00826 branched-chain amino acid aminotransferase [EC:2.6.1.42] |
| 13287_0159 | pyruvate dehydrogenase (EC:1.2.2.2); K00156 pyruvate dehydrogenase (cytochrome) [EC:1.2.2.2]                                    |

|            |                                                                                                                                                        |
|------------|--------------------------------------------------------------------------------------------------------------------------------------------------------|
| 13290_0041 | aspartate aminotransferase (EC:2.6.1.1); K00812 aspartate aminotransferase [EC:2.6.1.1]                                                                |
| 13287_0148 | glycine hydroxymethyltransferase related protein; K00600 glycine hydroxymethyltransferase [EC:2.1.2.1]                                                 |
| 13459_0263 | cystathionine gamma-lyase (EC:4.4.1.1); K01739 cystathionine gamma-synthase [EC:2.5.1.48]                                                              |
| 13334_0067 | tricorn protease interacting factor F2 (EC:3.4.11.-); K13722 tricorn protease interacting factor F2/3 [EC:3.4.11.-]                                    |
| 13287_0036 | NAD-dependent aldehyde dehydrogenase; K00128 aldehyde dehydrogenase (NAD+) [EC:1.2.1.3]                                                                |
| 13477_0019 | oxidoreductase                                                                                                                                         |
| 13459_0040 | malate dehydrogenase (EC:1.1.1.37); K00024 malate dehydrogenase [EC:1.1.1.37]                                                                          |
| 13455_0087 | electron transfer flavoprotein subunit beta; K03521 electron transfer flavoprotein beta subunit                                                        |
| 13459_0214 | dihydrolipoamide dehydrogenase (EC:1.8.1.4); K00382 dihydrolipoamide dehydrogenase [EC:1.8.1.4]                                                        |
| 13459_0213 | branched-chain alpha-keto acid dehydrogenase subunit E2; K00627 pyruvate dehydrogenase E2 component (dihydrolipoamide acetyltransferase) [EC:2.3.1.12] |
| 13459_0212 | thiamine pyrophosphate-dependent dehydrogenase, E1 component beta subunit; K00162 pyruvate dehydrogenase E1 component subunit beta [EC:1.2.4.1]        |
| 13459_0162 | aconitate hydratase (EC:4.2.1.3); K01681 aconitate hydratase 1 [EC:4.2.1.3]                                                                            |
| 13459_0183 | pyruvate ferredoxin oxidoreductase, alpha chain (EC:1.2.7.1); K00174 2-oxoglutarate ferredoxin oxidoreductase subunit alpha [EC:1.2.7.3]               |

**Table S6. Results of pair-wise comparisons of deamidation frequencies between archaea and bacteria in early growth stage (GS1), late growth-stage (GS2) and sunken biofilms using Tukey's honestly significant difference test. NS = not significant; \* =  $p < 0.05$ ; \*\* =  $p < 0.01$ ; \*\*\*  $p = <.001$ .**

|                 | Archaea GS1 | Archaea GS2 | Archaea Sunken | Bacteria GS1 | Bacteria GS2 | Bacteria Sunken |
|-----------------|-------------|-------------|----------------|--------------|--------------|-----------------|
| Archaea GS1     |             | NS          | ***            | NS           | ***          | ***             |
| Archaea GS2     | NS          |             | **             | NS           | ***          | ***             |
| Archaea Sunken  | NS          | NS          |                | NS           | NS           | **              |
| Bacteria GS1    | NS          | NS          | NS             |              | ***          | ***             |
| Bacteria GS2    | *           | NS          | NS             | *            |              | *               |
| Bacteria Sunken | ***         | ***         | ***            | ***          | **           |                 |
